# Supplementary material for: Thermodynamically driven self-formation of copper-embedded nitrogen-doped carbon nanofiber catalysts for a cascade electroreduction of carbon dioxide to ethylene
Source: Royal Society of Chemistry journal article supplement (doi:10.1039/d0ta03322g), 2020-01-01
Supplement: d0ta03322g1.pdf [file d0ta03322g1.pdf]

## **Supplementary Information**

# **Thermodynamically driven self-formation of copper-embedded nitrogen-doped carbon nanofiber catalysts for a cascade electroreduction of carbon dioxide to ethylene**

Jae-Chan Lee,<sup>a</sup> Ji-Yong Kim,<sup>a</sup> Won-Hyo Joo,<sup>a</sup> Deokgi Hong,<sup>a</sup> Sang-Ho Oh,<sup>a</sup> Beomil Kim,<sup>b</sup> Gun-Do Lee,<sup>a</sup> Miyoung Kim,<sup>a</sup> Jihun Oh,<sup>b, \*</sup> and Young-Chang Joo<sup>a, \*</sup>

*<sup>a</sup>Department of Materials Science & Engineering, Seoul National University, Seoul 151-744, Korea*

*<sup>b</sup>Department of Materials Science and Engineering, Korea Advanced Institute of Science and Technology (KAIST), Daejeon 305-701, Korea*

**\*Corresponding authors:**

**Jihun Oh\***

**E-mail: [jihun.oh@kaist.ac.kr](mailto:jihun.oh@kaist.ac.kr), Tel: +82-42-350-1726**

**Daehak-ro, Yuseong-gu, Daejeon 305-701, Korea**

**Young-Chang Joo\***

**E-mail: [ycjoo@snu.ac.kr](mailto:ycjoo@snu.ac.kr), Tel: +82-2-880-8986, Fax: +82-2-883-8197**

**1 Gwanak-ro, Gwanak-gu, Seoul 151-744, Korea**

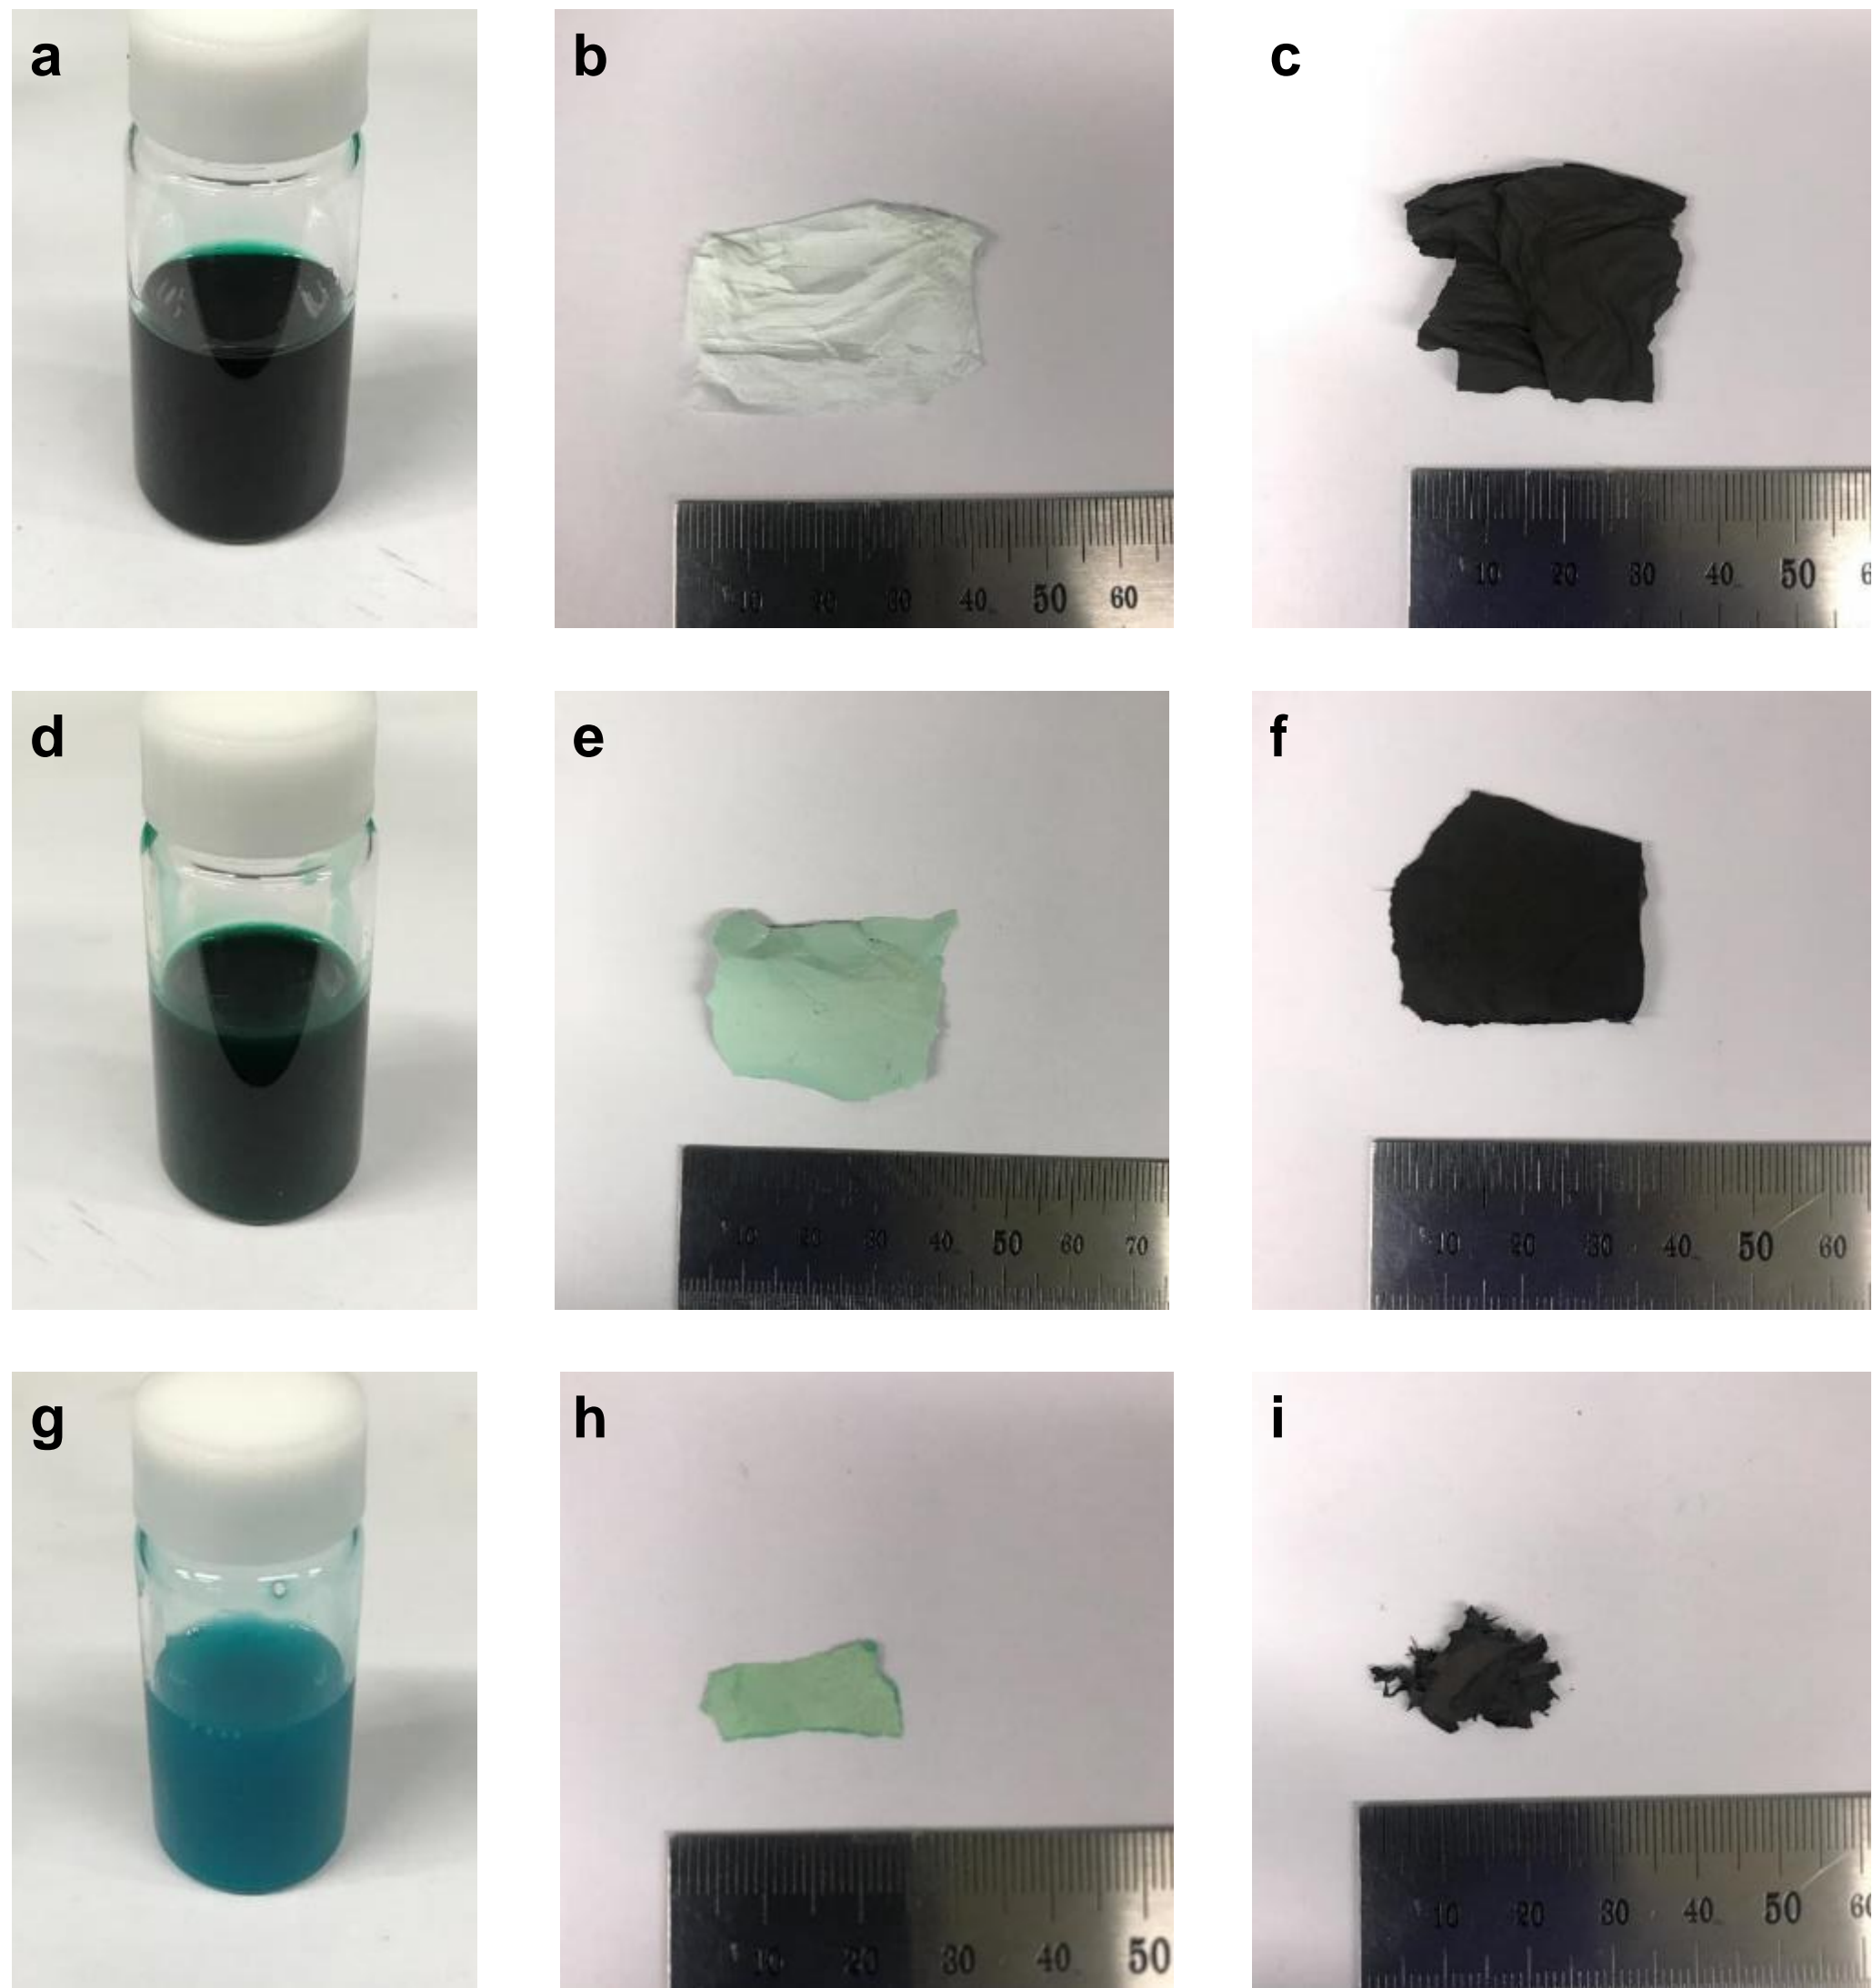

**Fig. S1** Digital images of (a, d, g,) electrospinning solution, (b, e, h) as spun nanofibers, and (c, f, i) calcinated nanofibers of (a, b, c) Cu30/N-CNF, (d, e, f) Cu50/N-CNF, and (g, h, i) Cu50/CNF

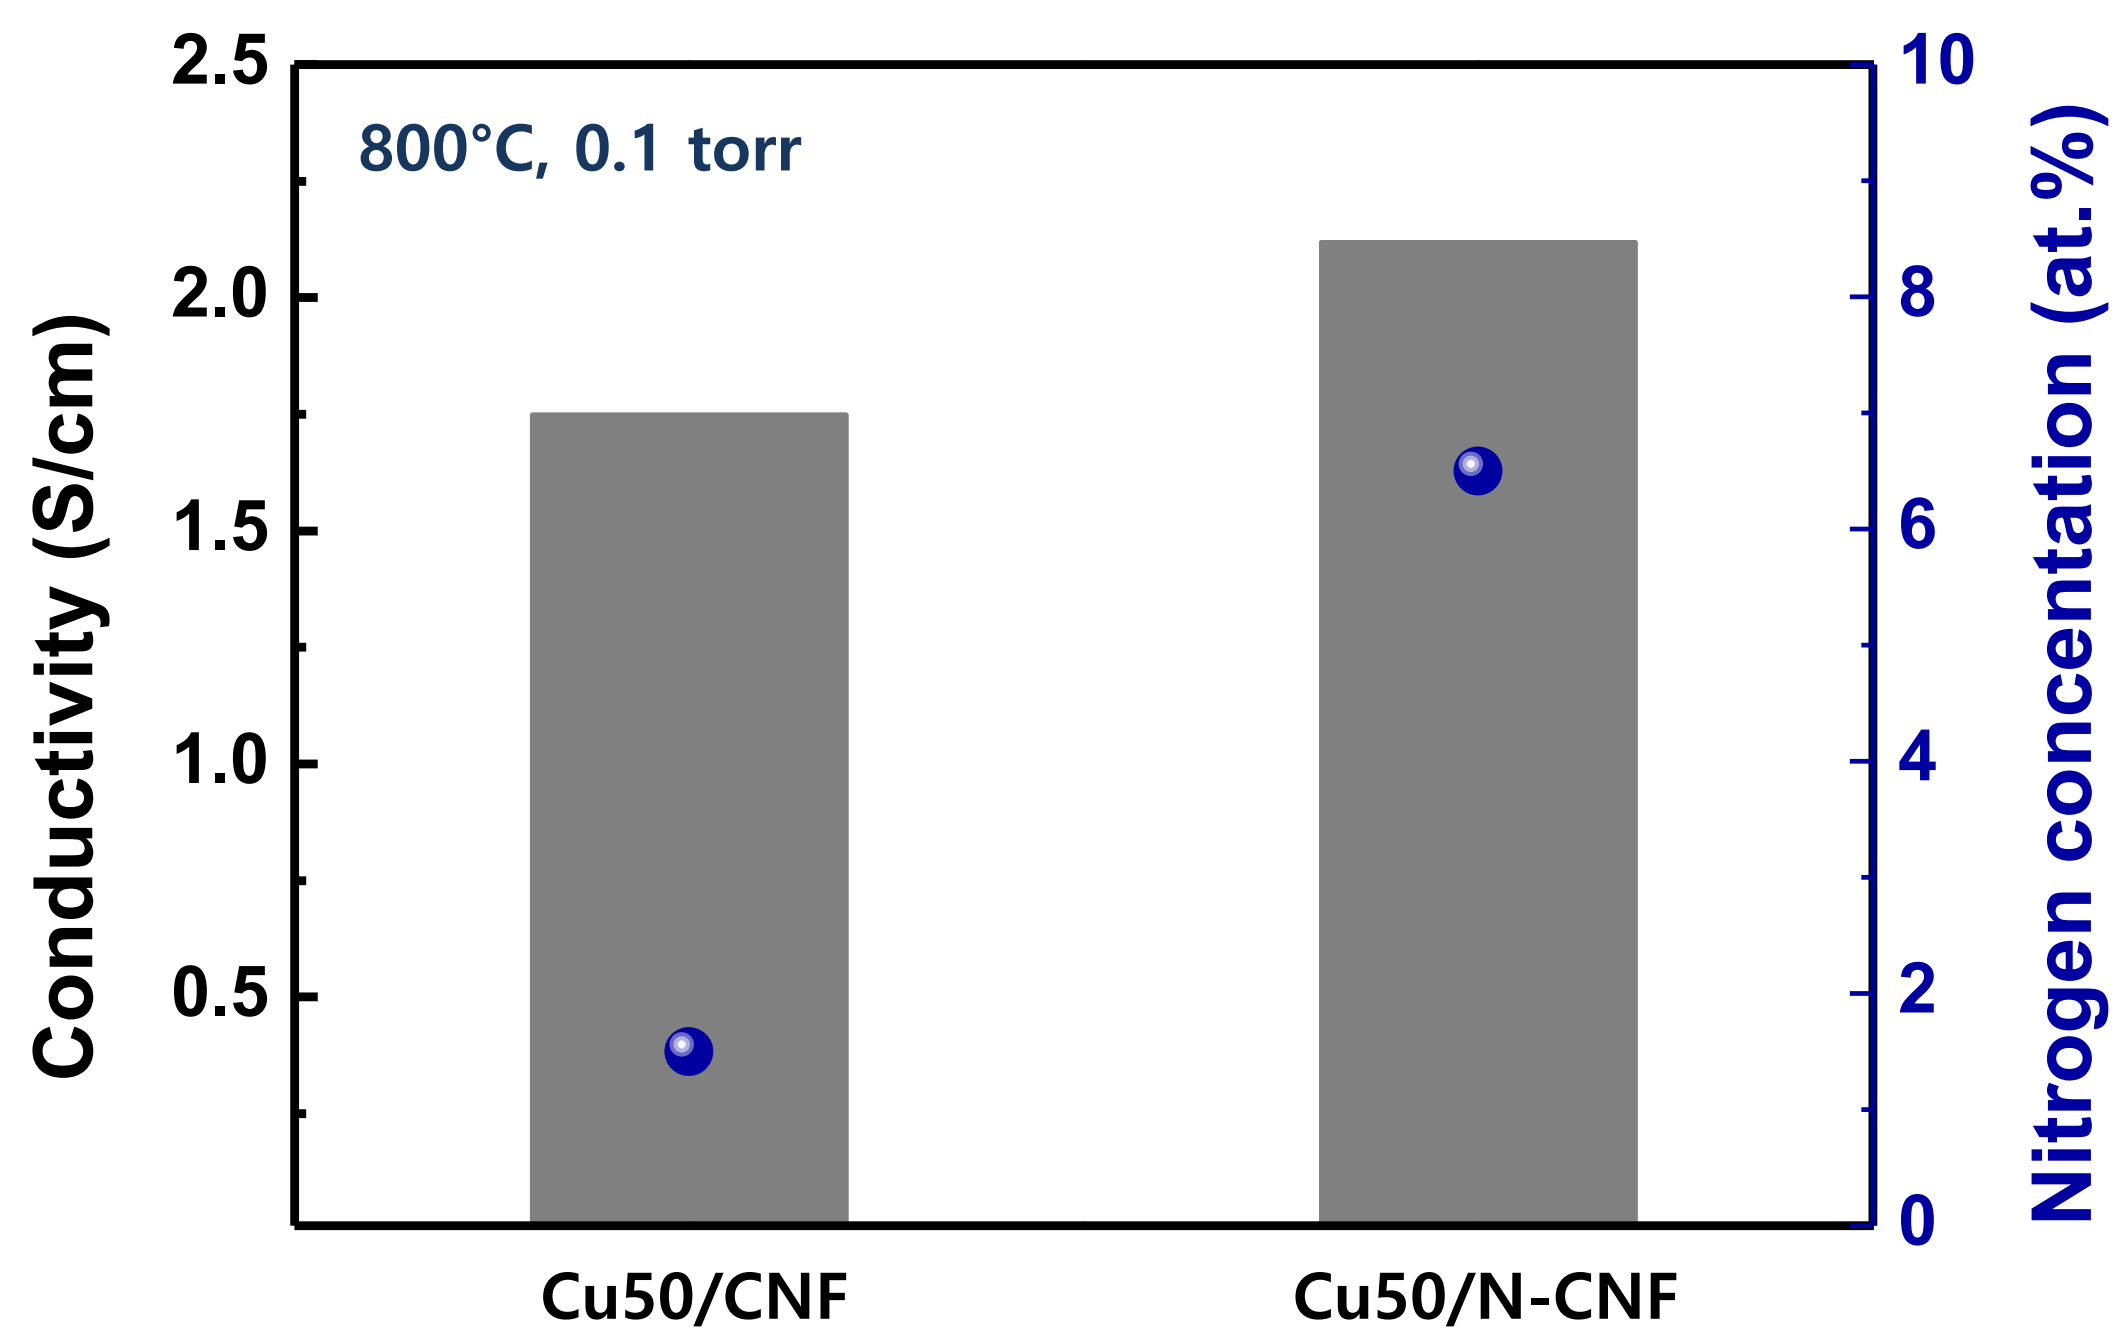

**Fig. S2** Electrical conductivity and nitrogen concentration of Cu50/CNF and Cu50/N-CNF catalysts

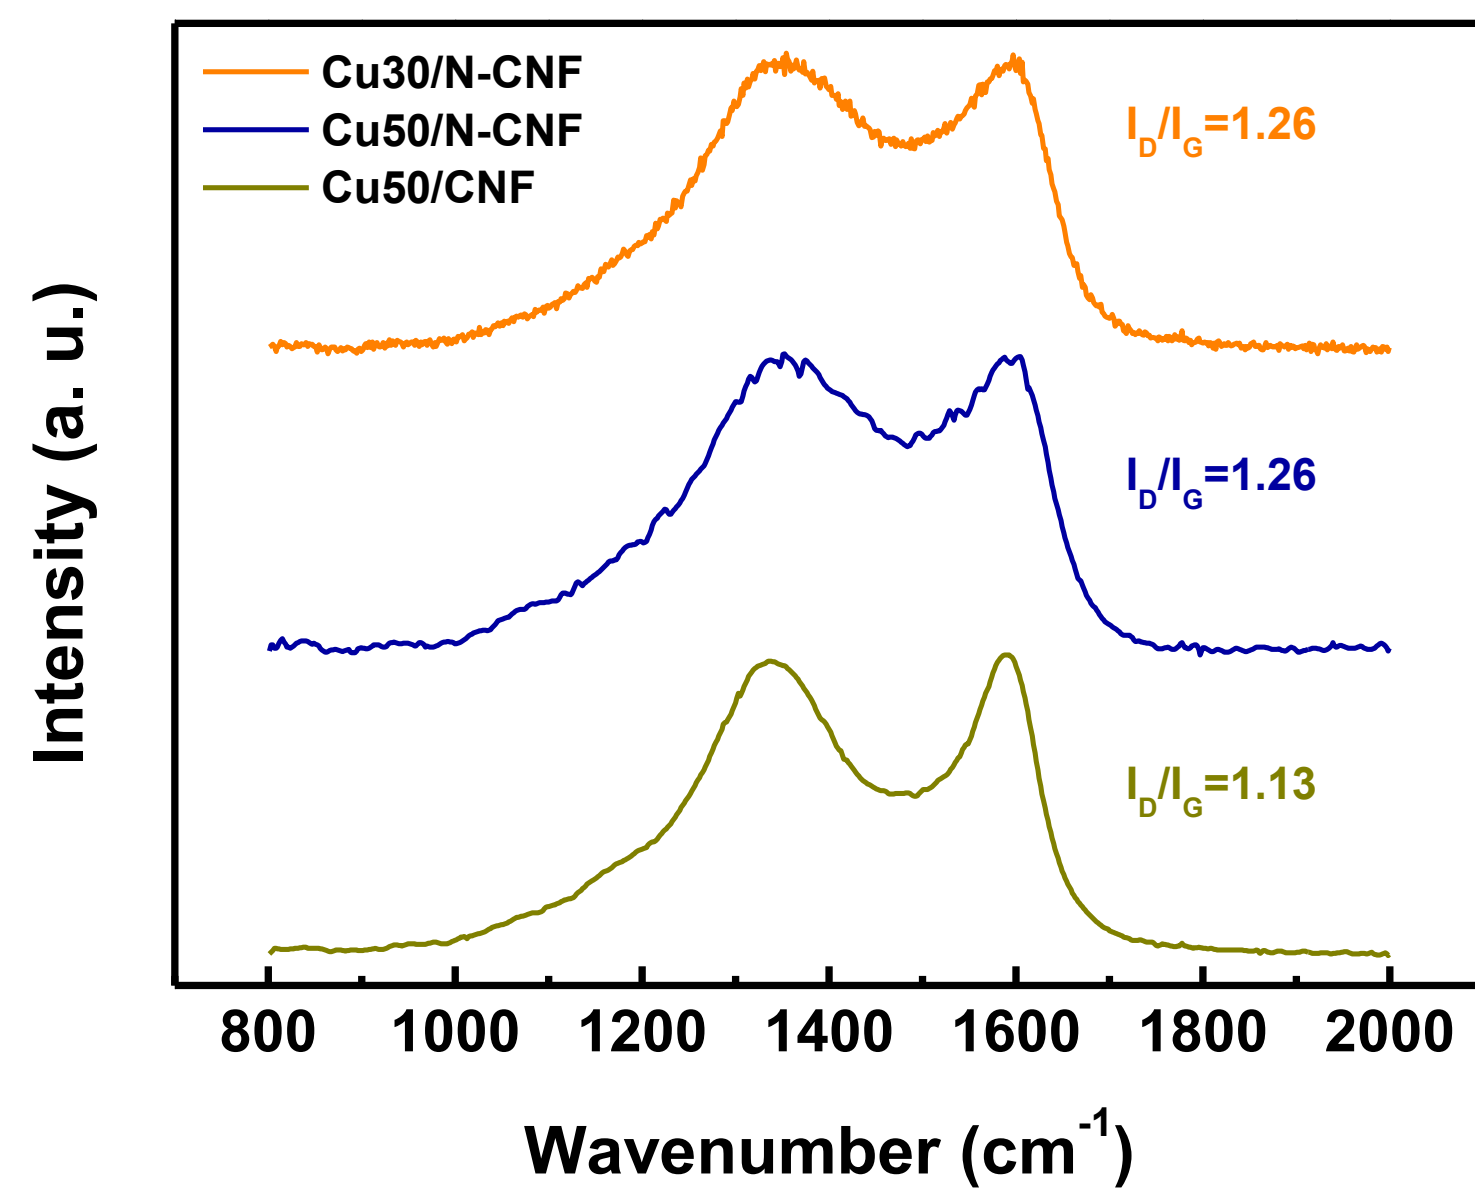

**Fig. S3** Raman spectrum of Cu30/N-CNF, Cu50/N-CNF, and Cu50/CNF catalyst

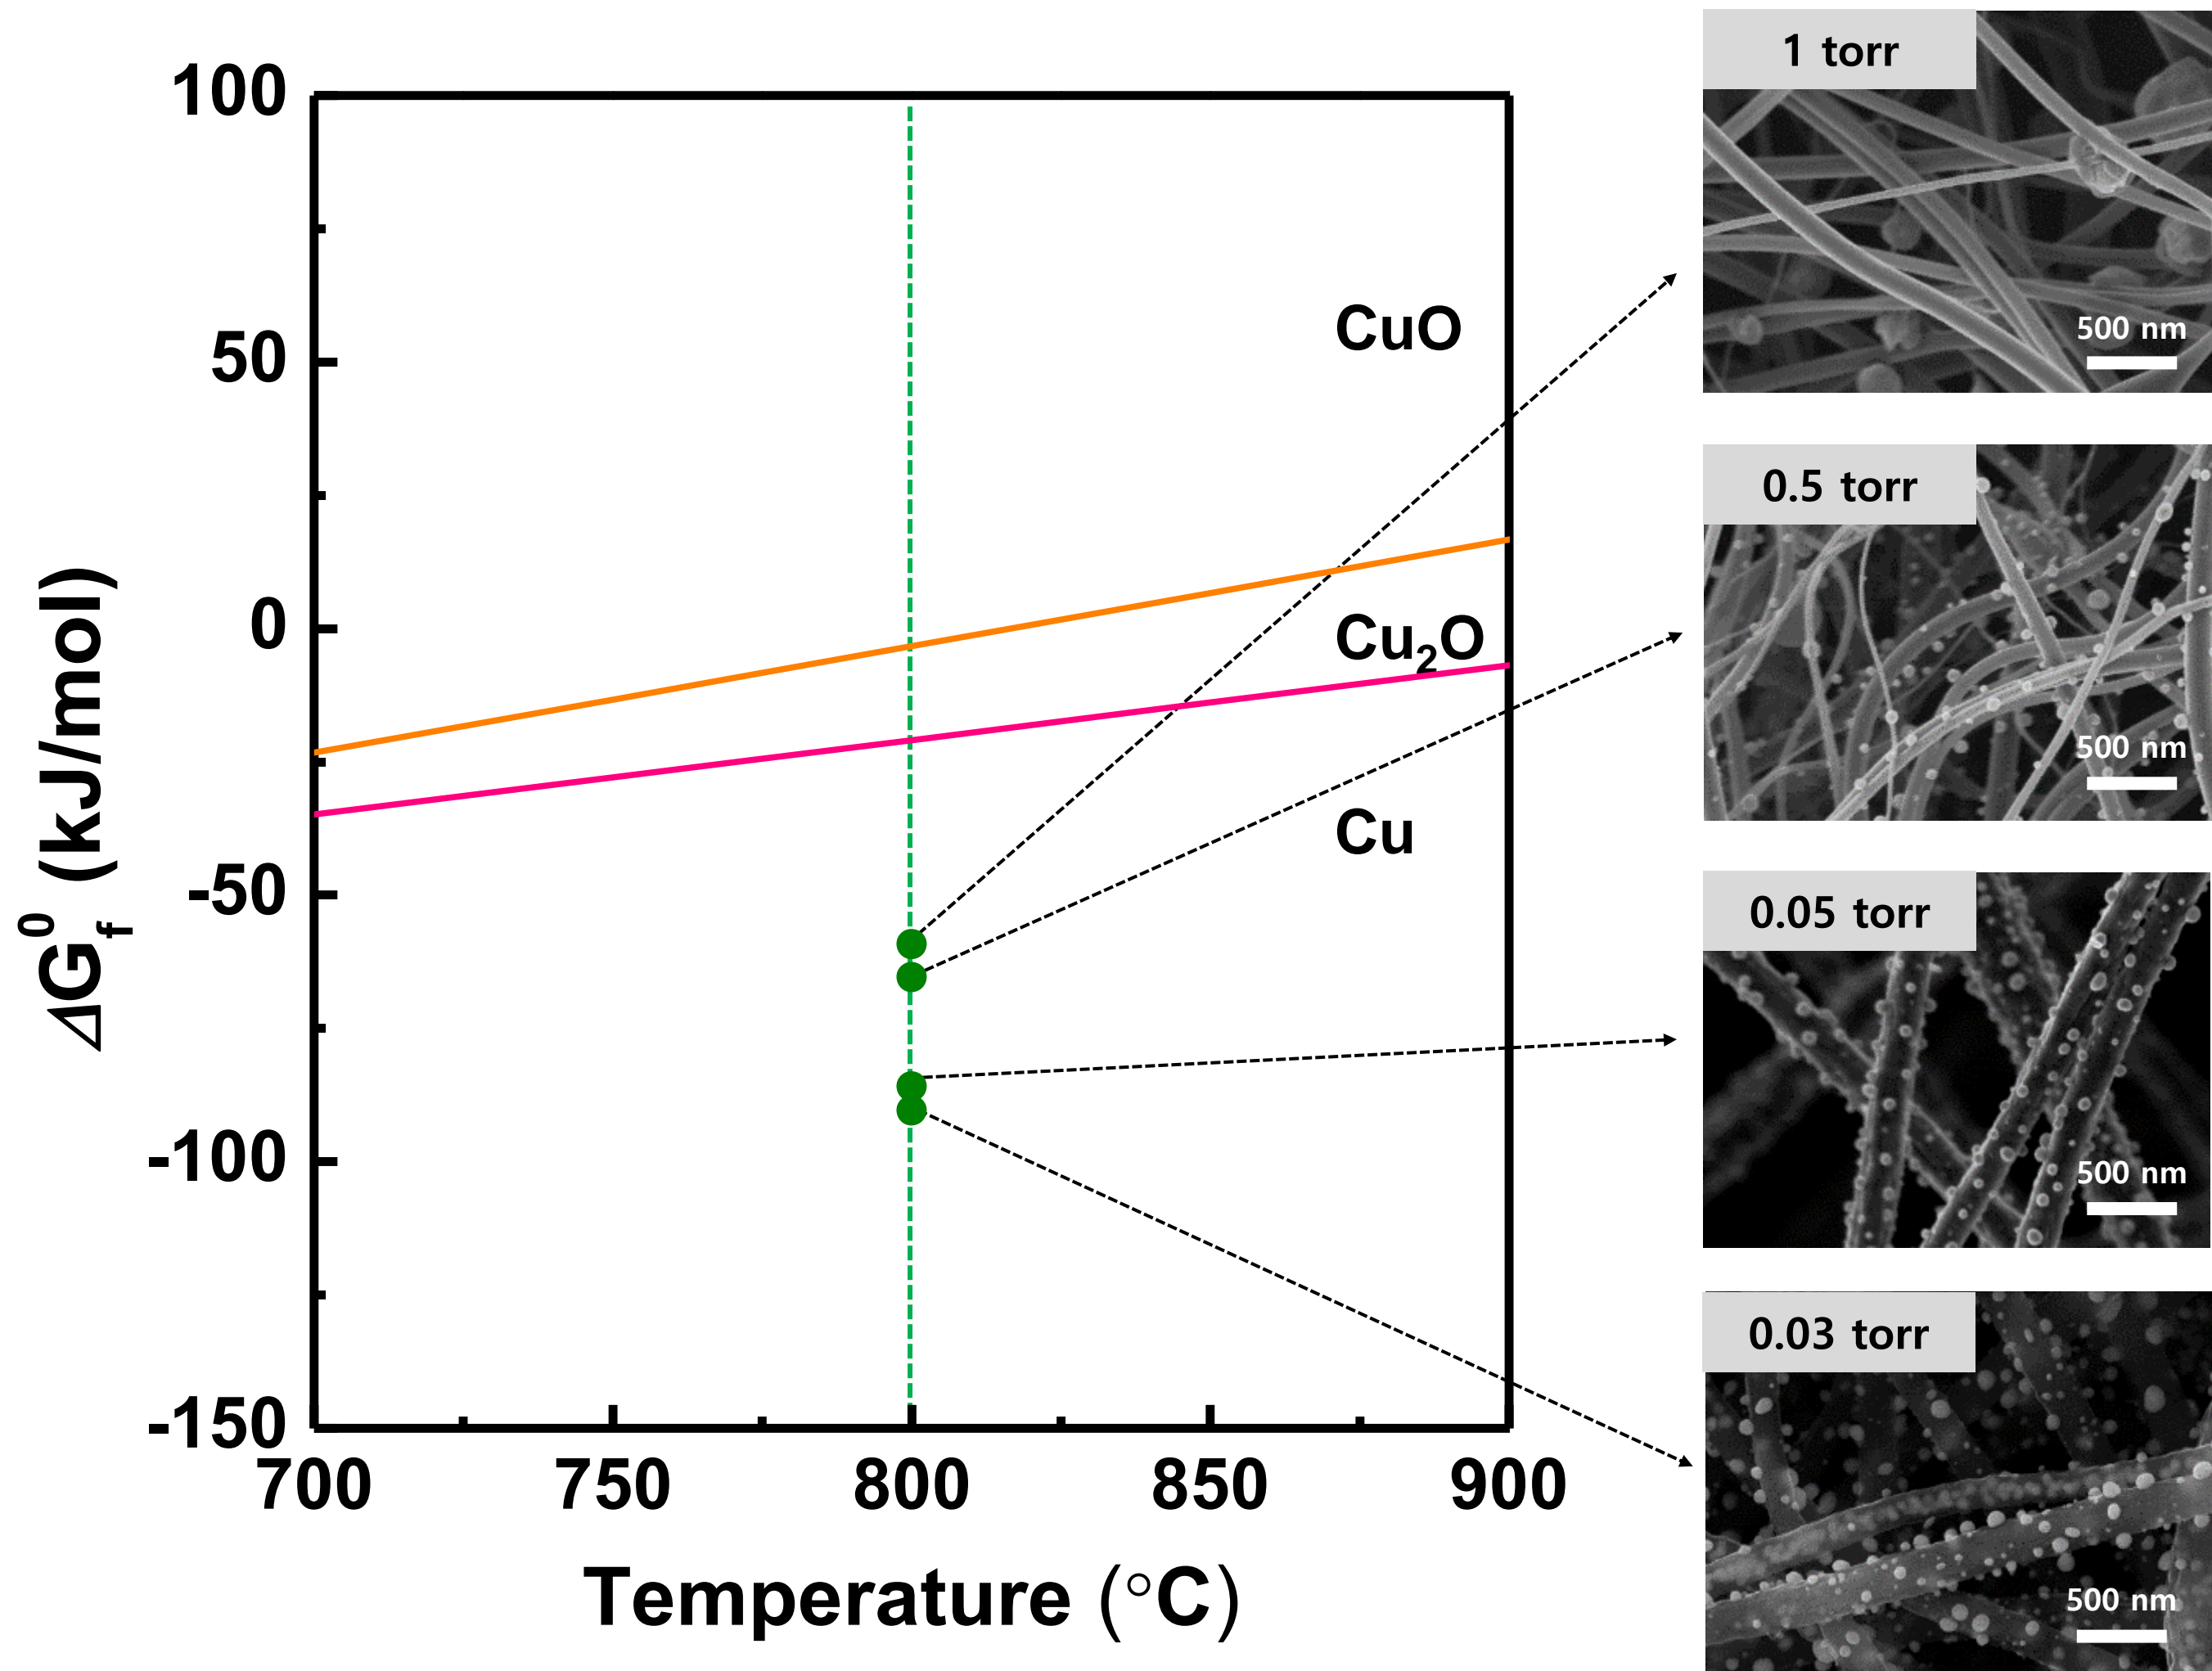

**Fig. S4** Ellingham diagram of N, C, and Cu and morphological change of Cu50/N-CNF as O<sub>2</sub> partial pressure increases



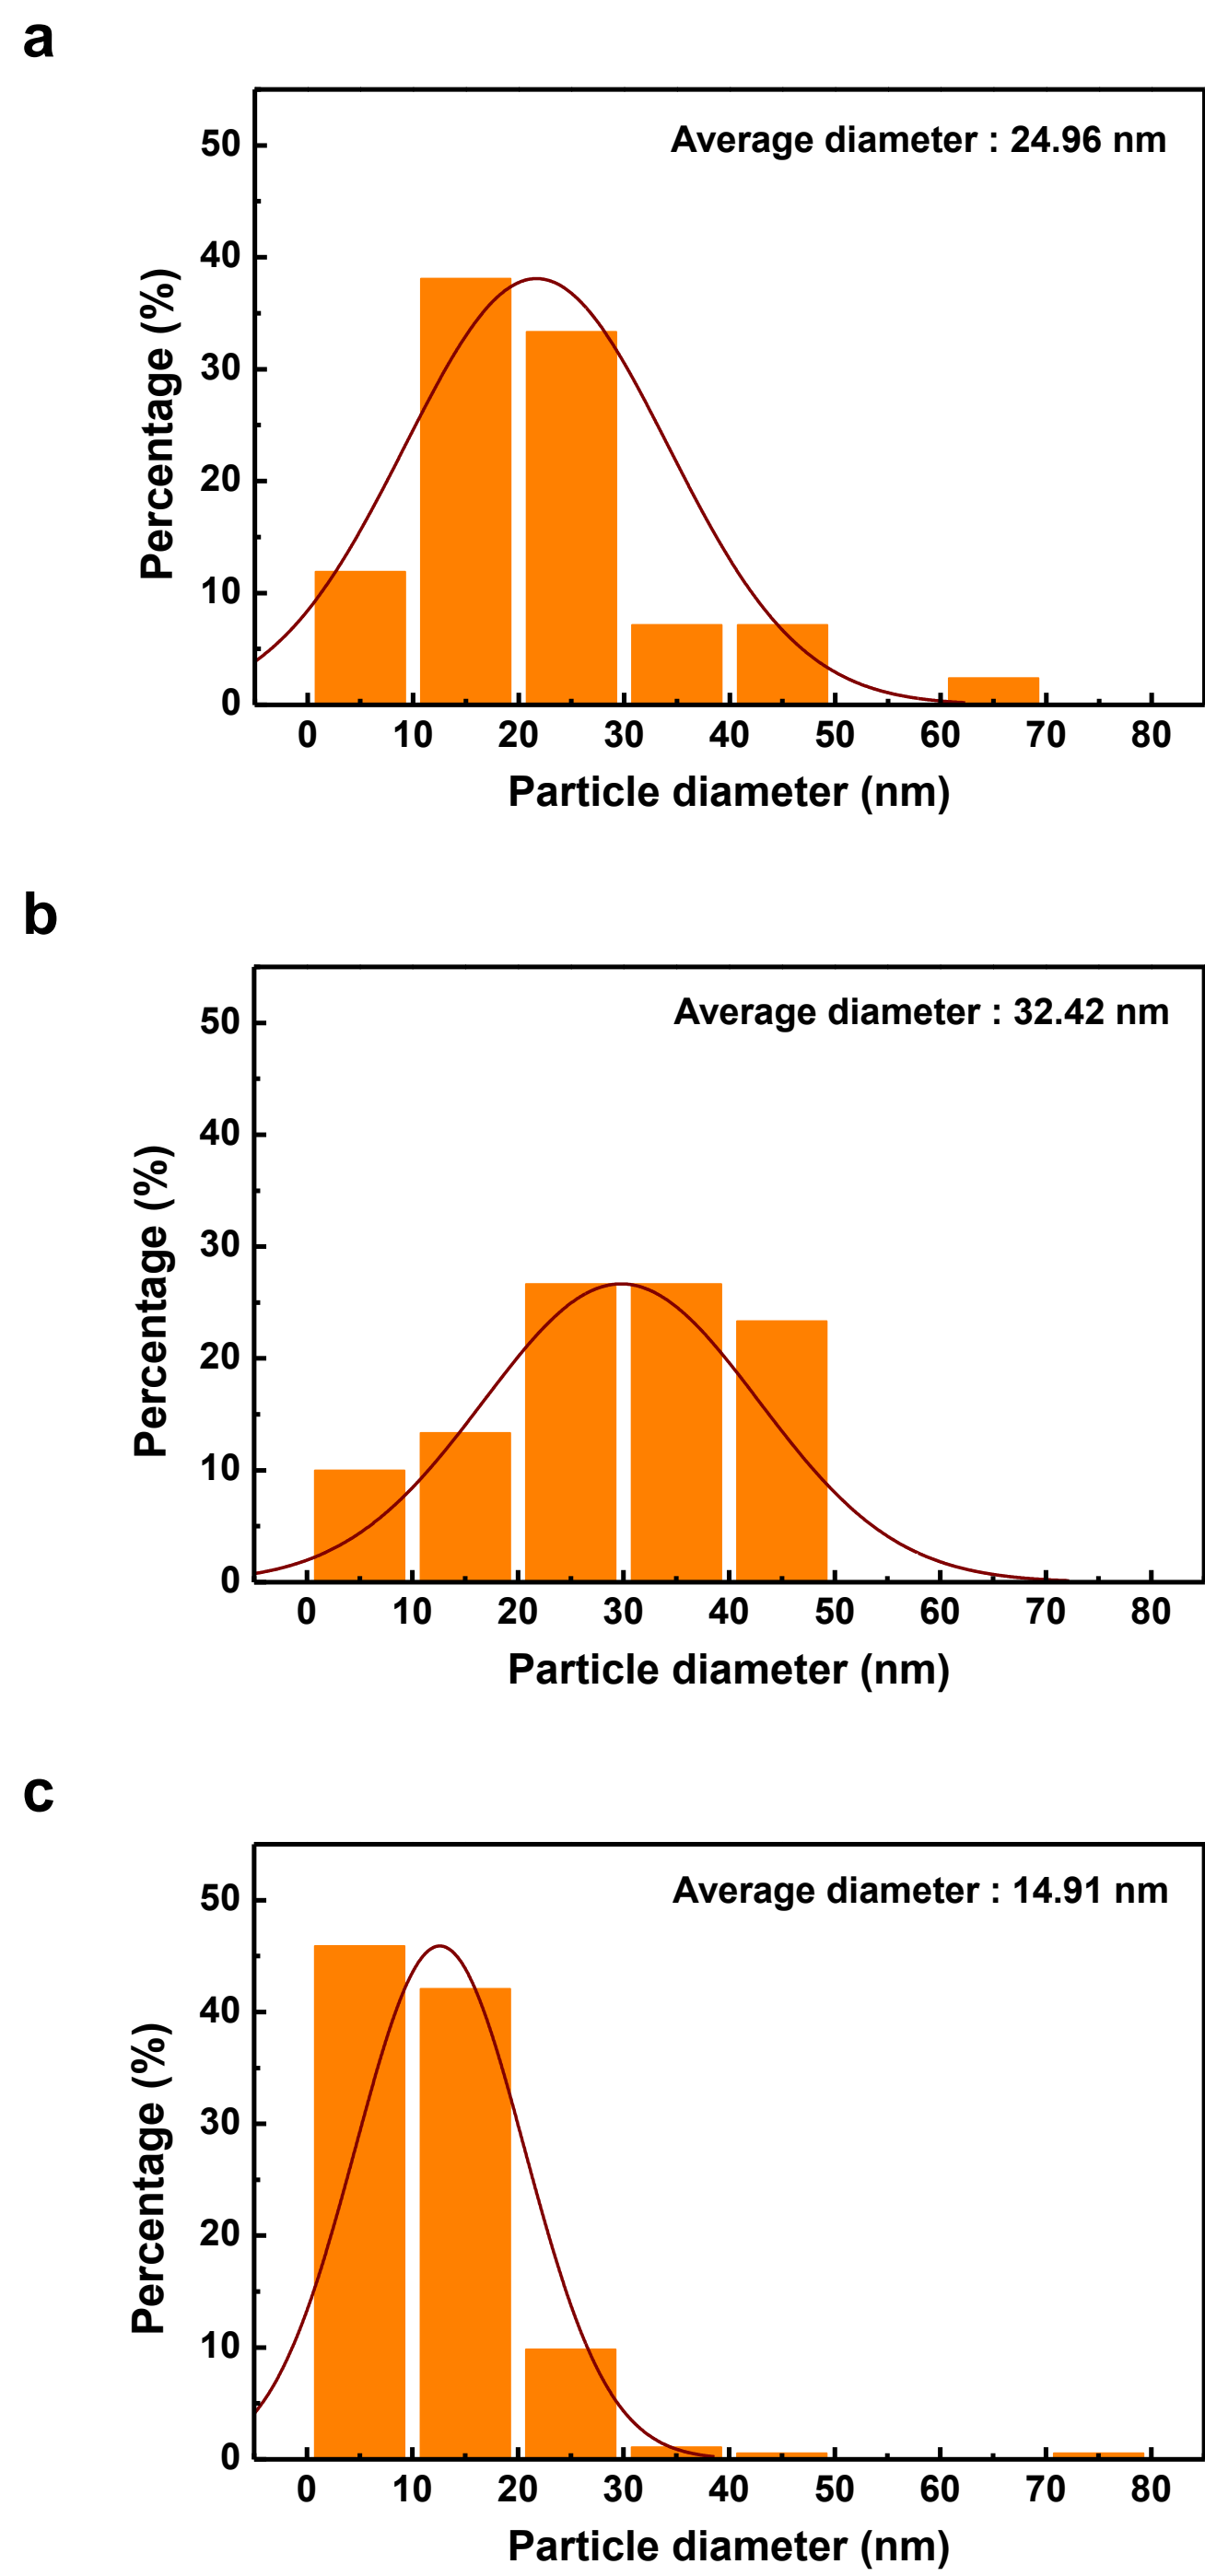

**Fig. S5** Particle size distribution of (a) Cu30/N-CNF and (b) Cu50/N-CNF, and (c) Cu50/CNF

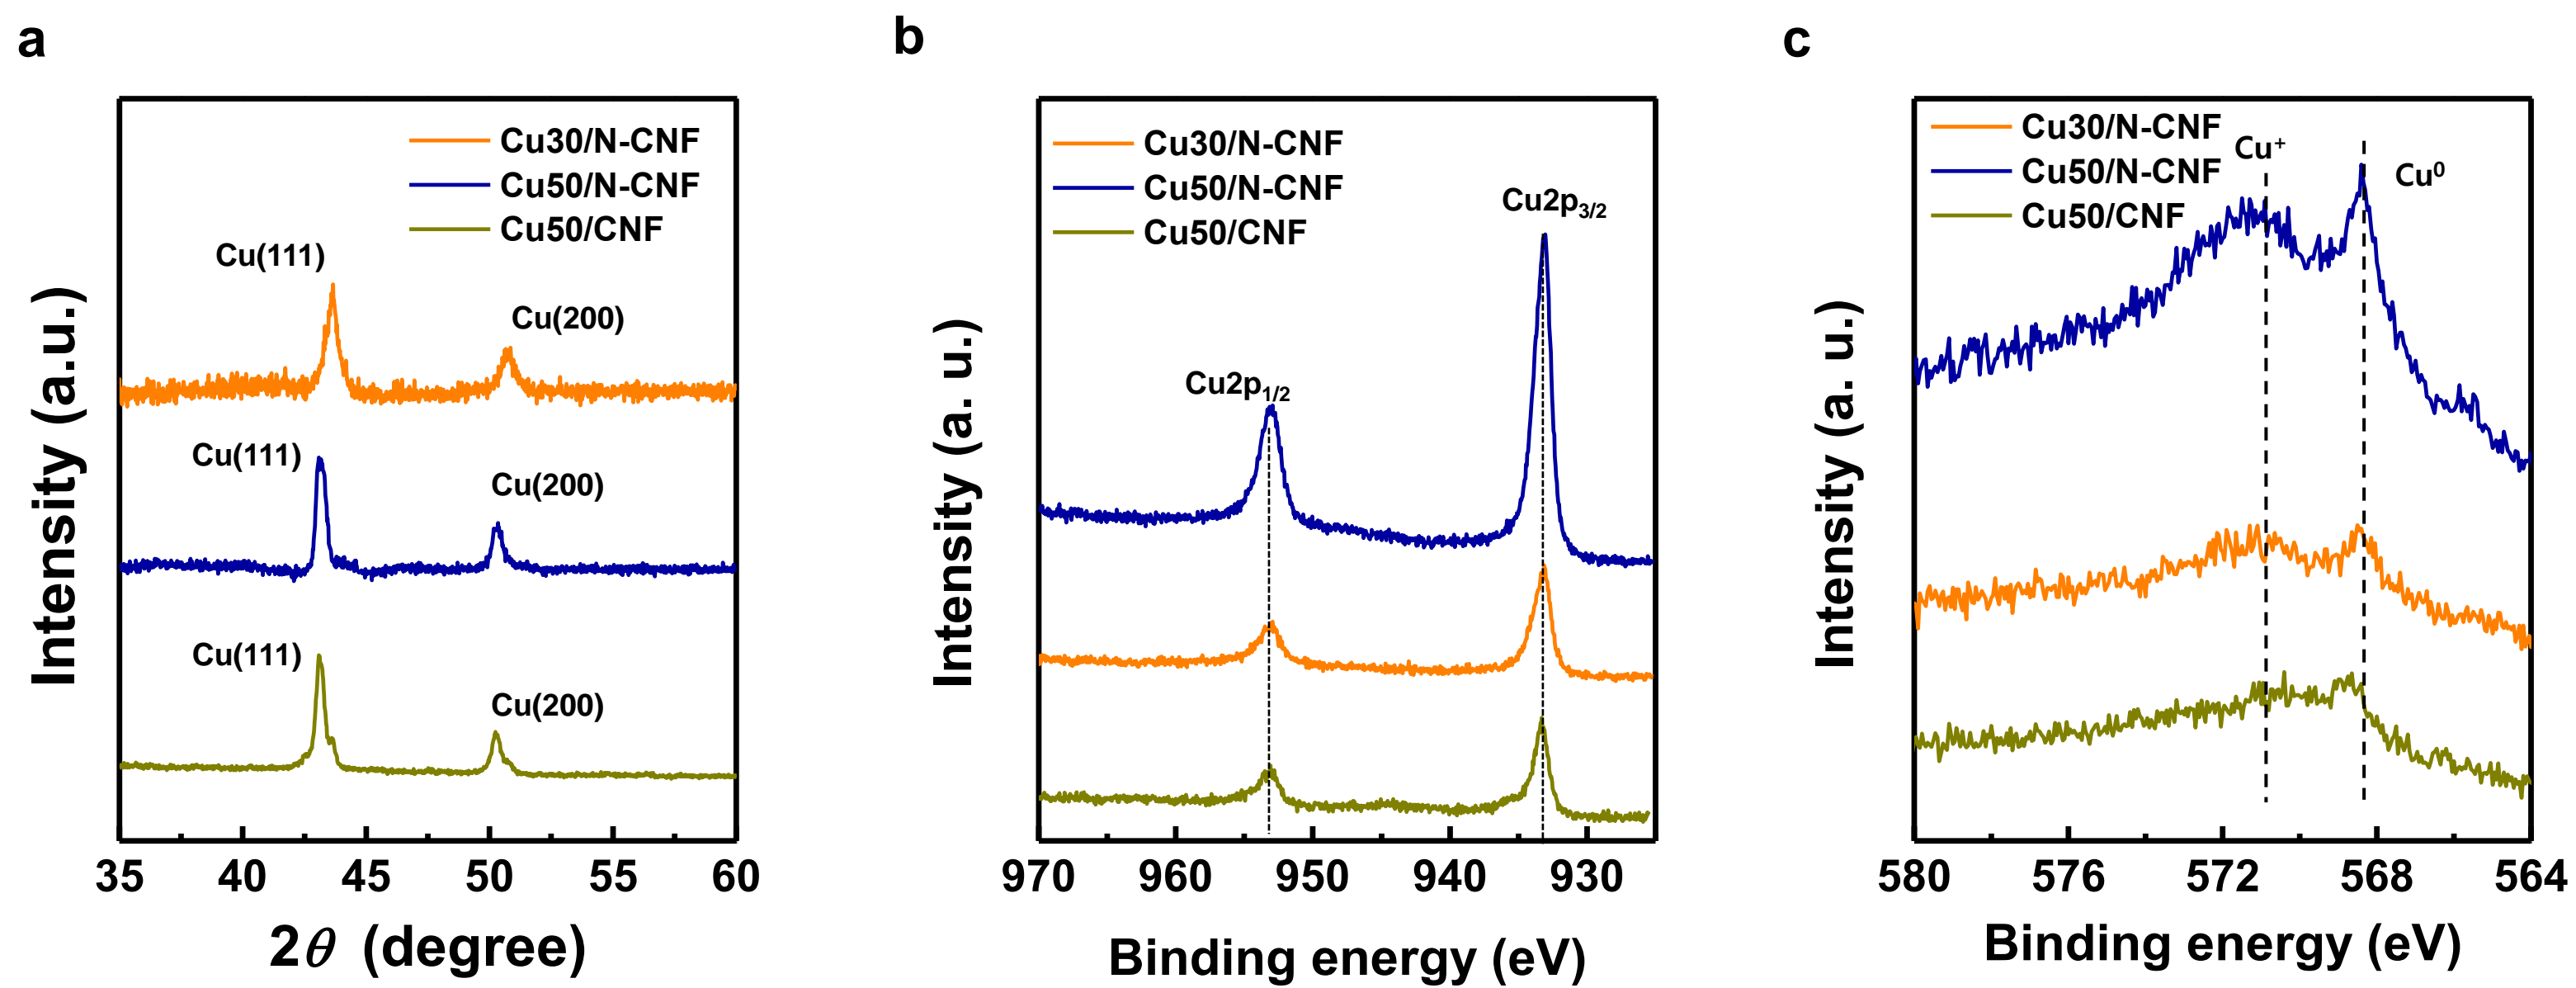

**Fig. S6** (a) XRD pattern (b) Cu2p spectra, and (c) Cu LMM spectra of Cu/N-CNF catalysts



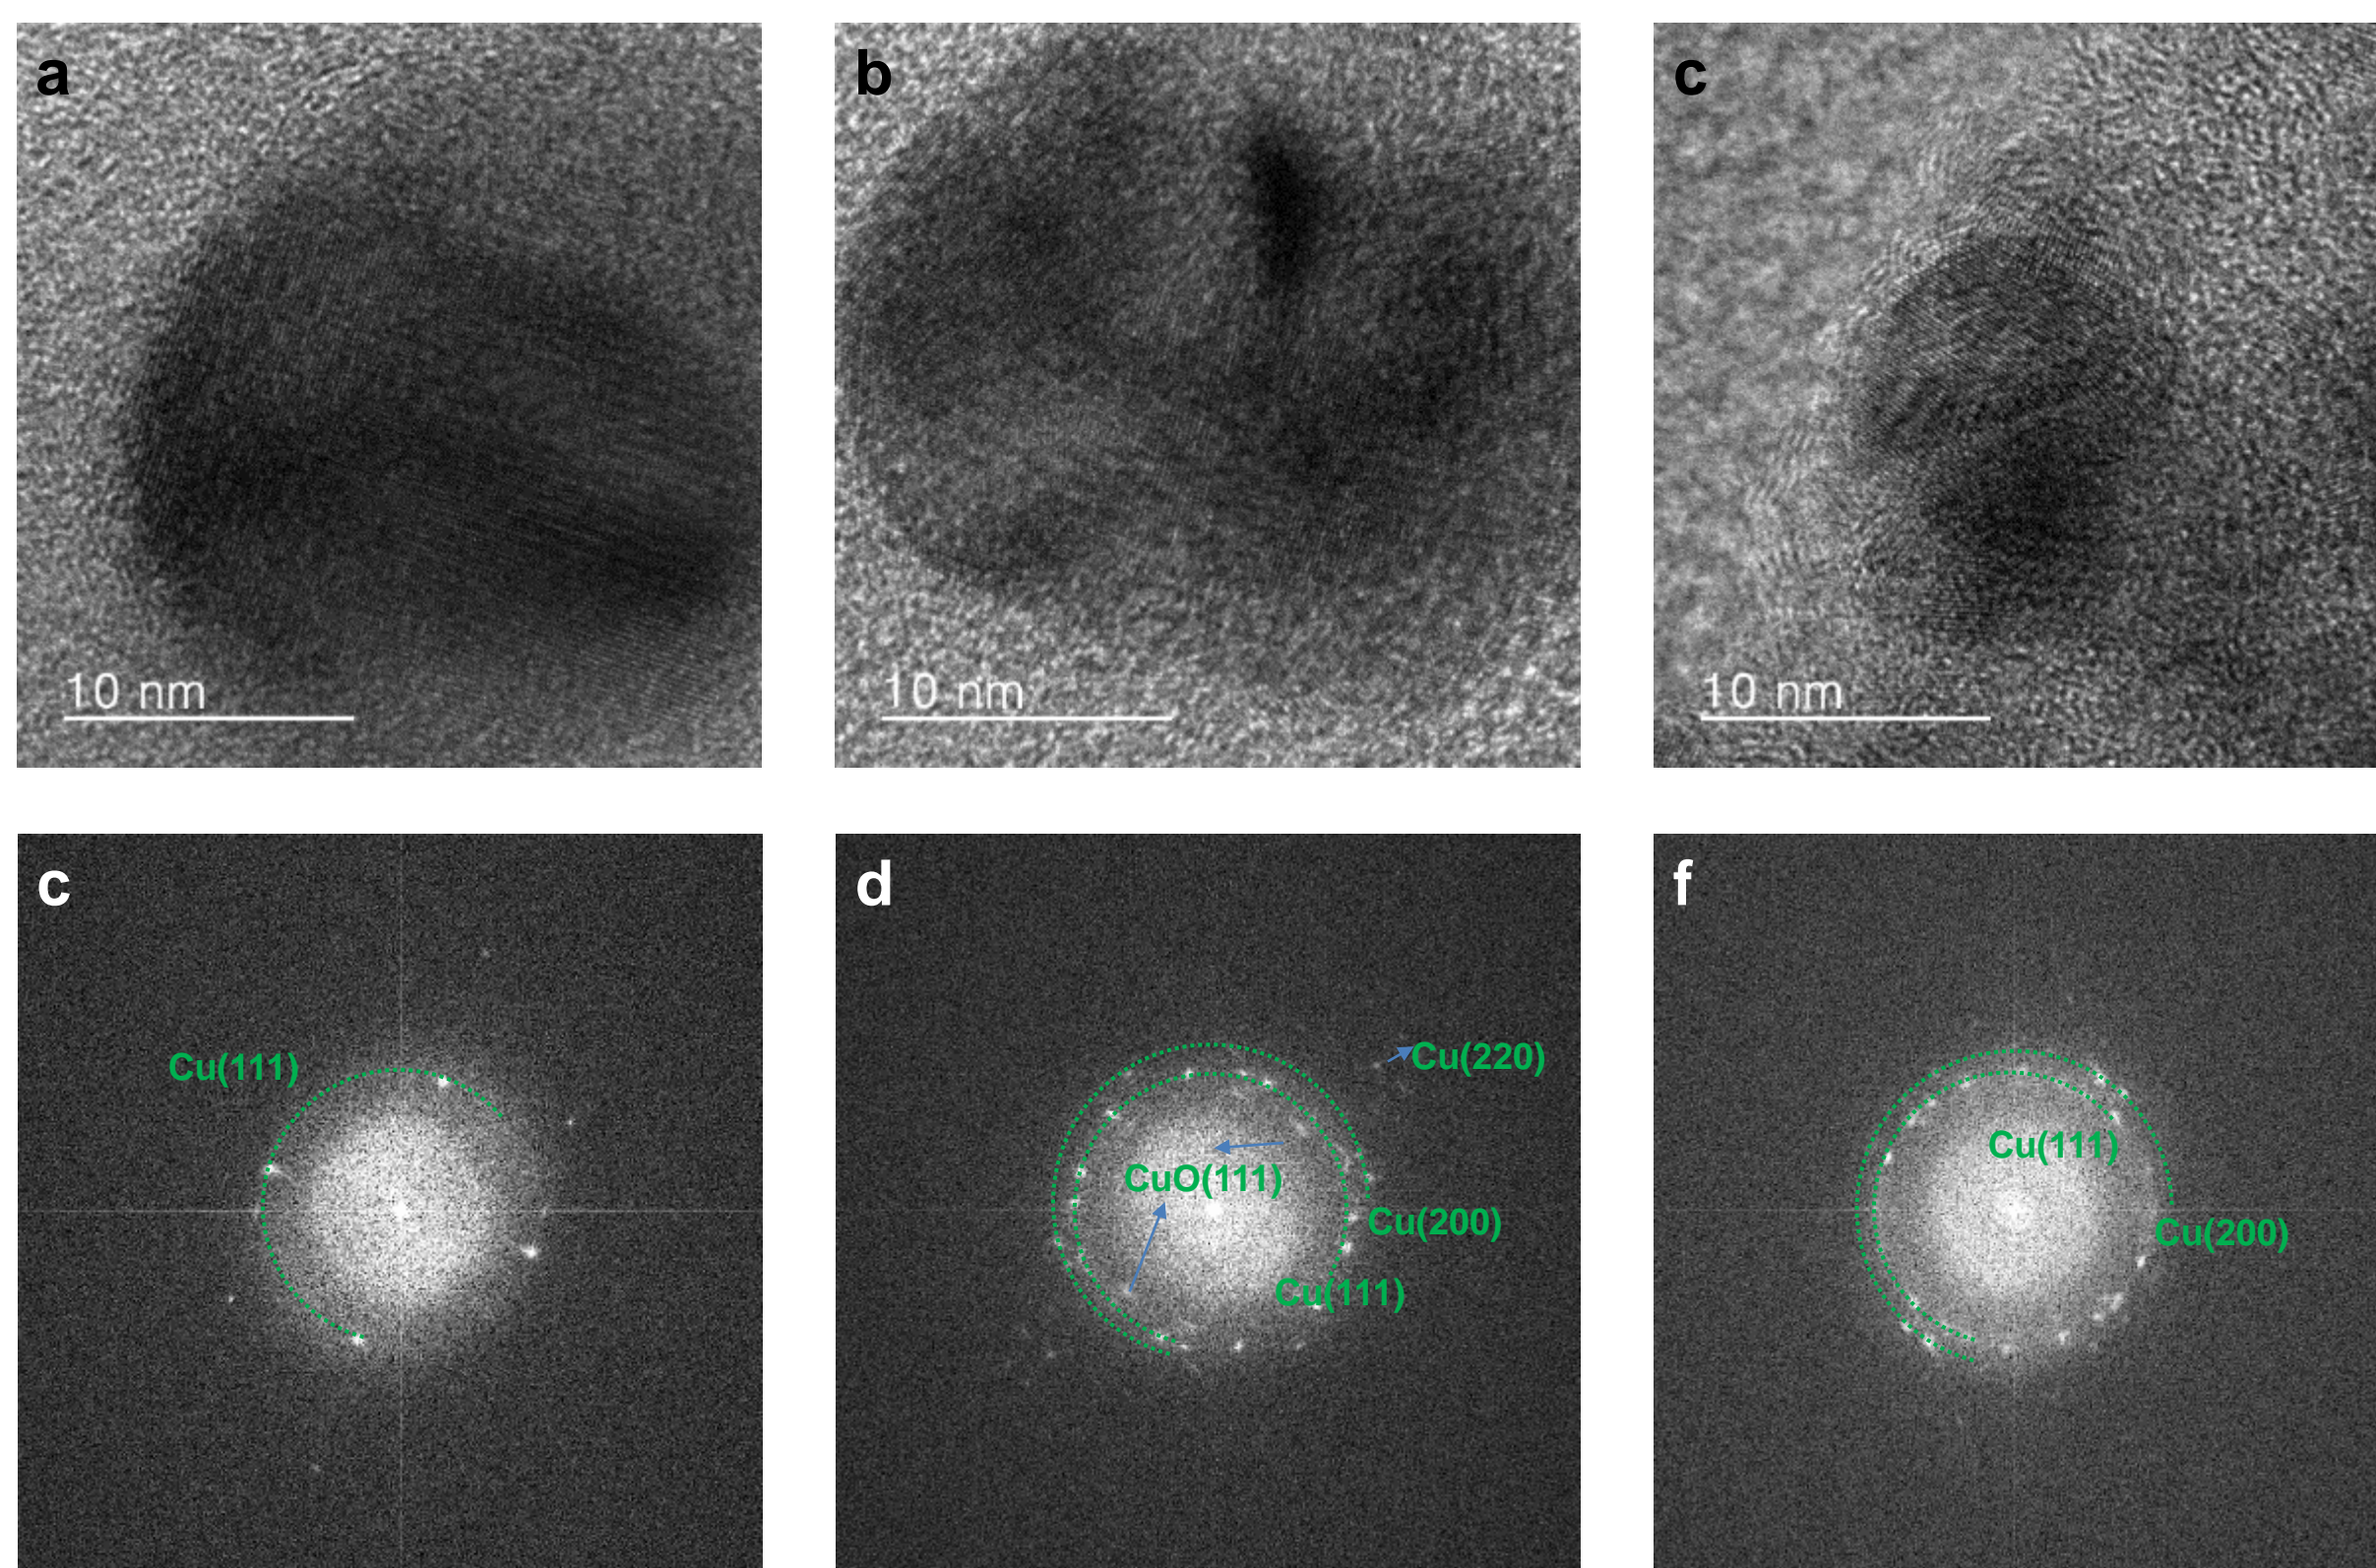

**Fig. S7** HRTEM image and FFT diffraction pattern of (a, c) Cu<sub>30</sub>/N-CNF, (b, d) Cu<sub>50</sub>/N-CNF, and (c, f) Cu<sub>50</sub>/CNF



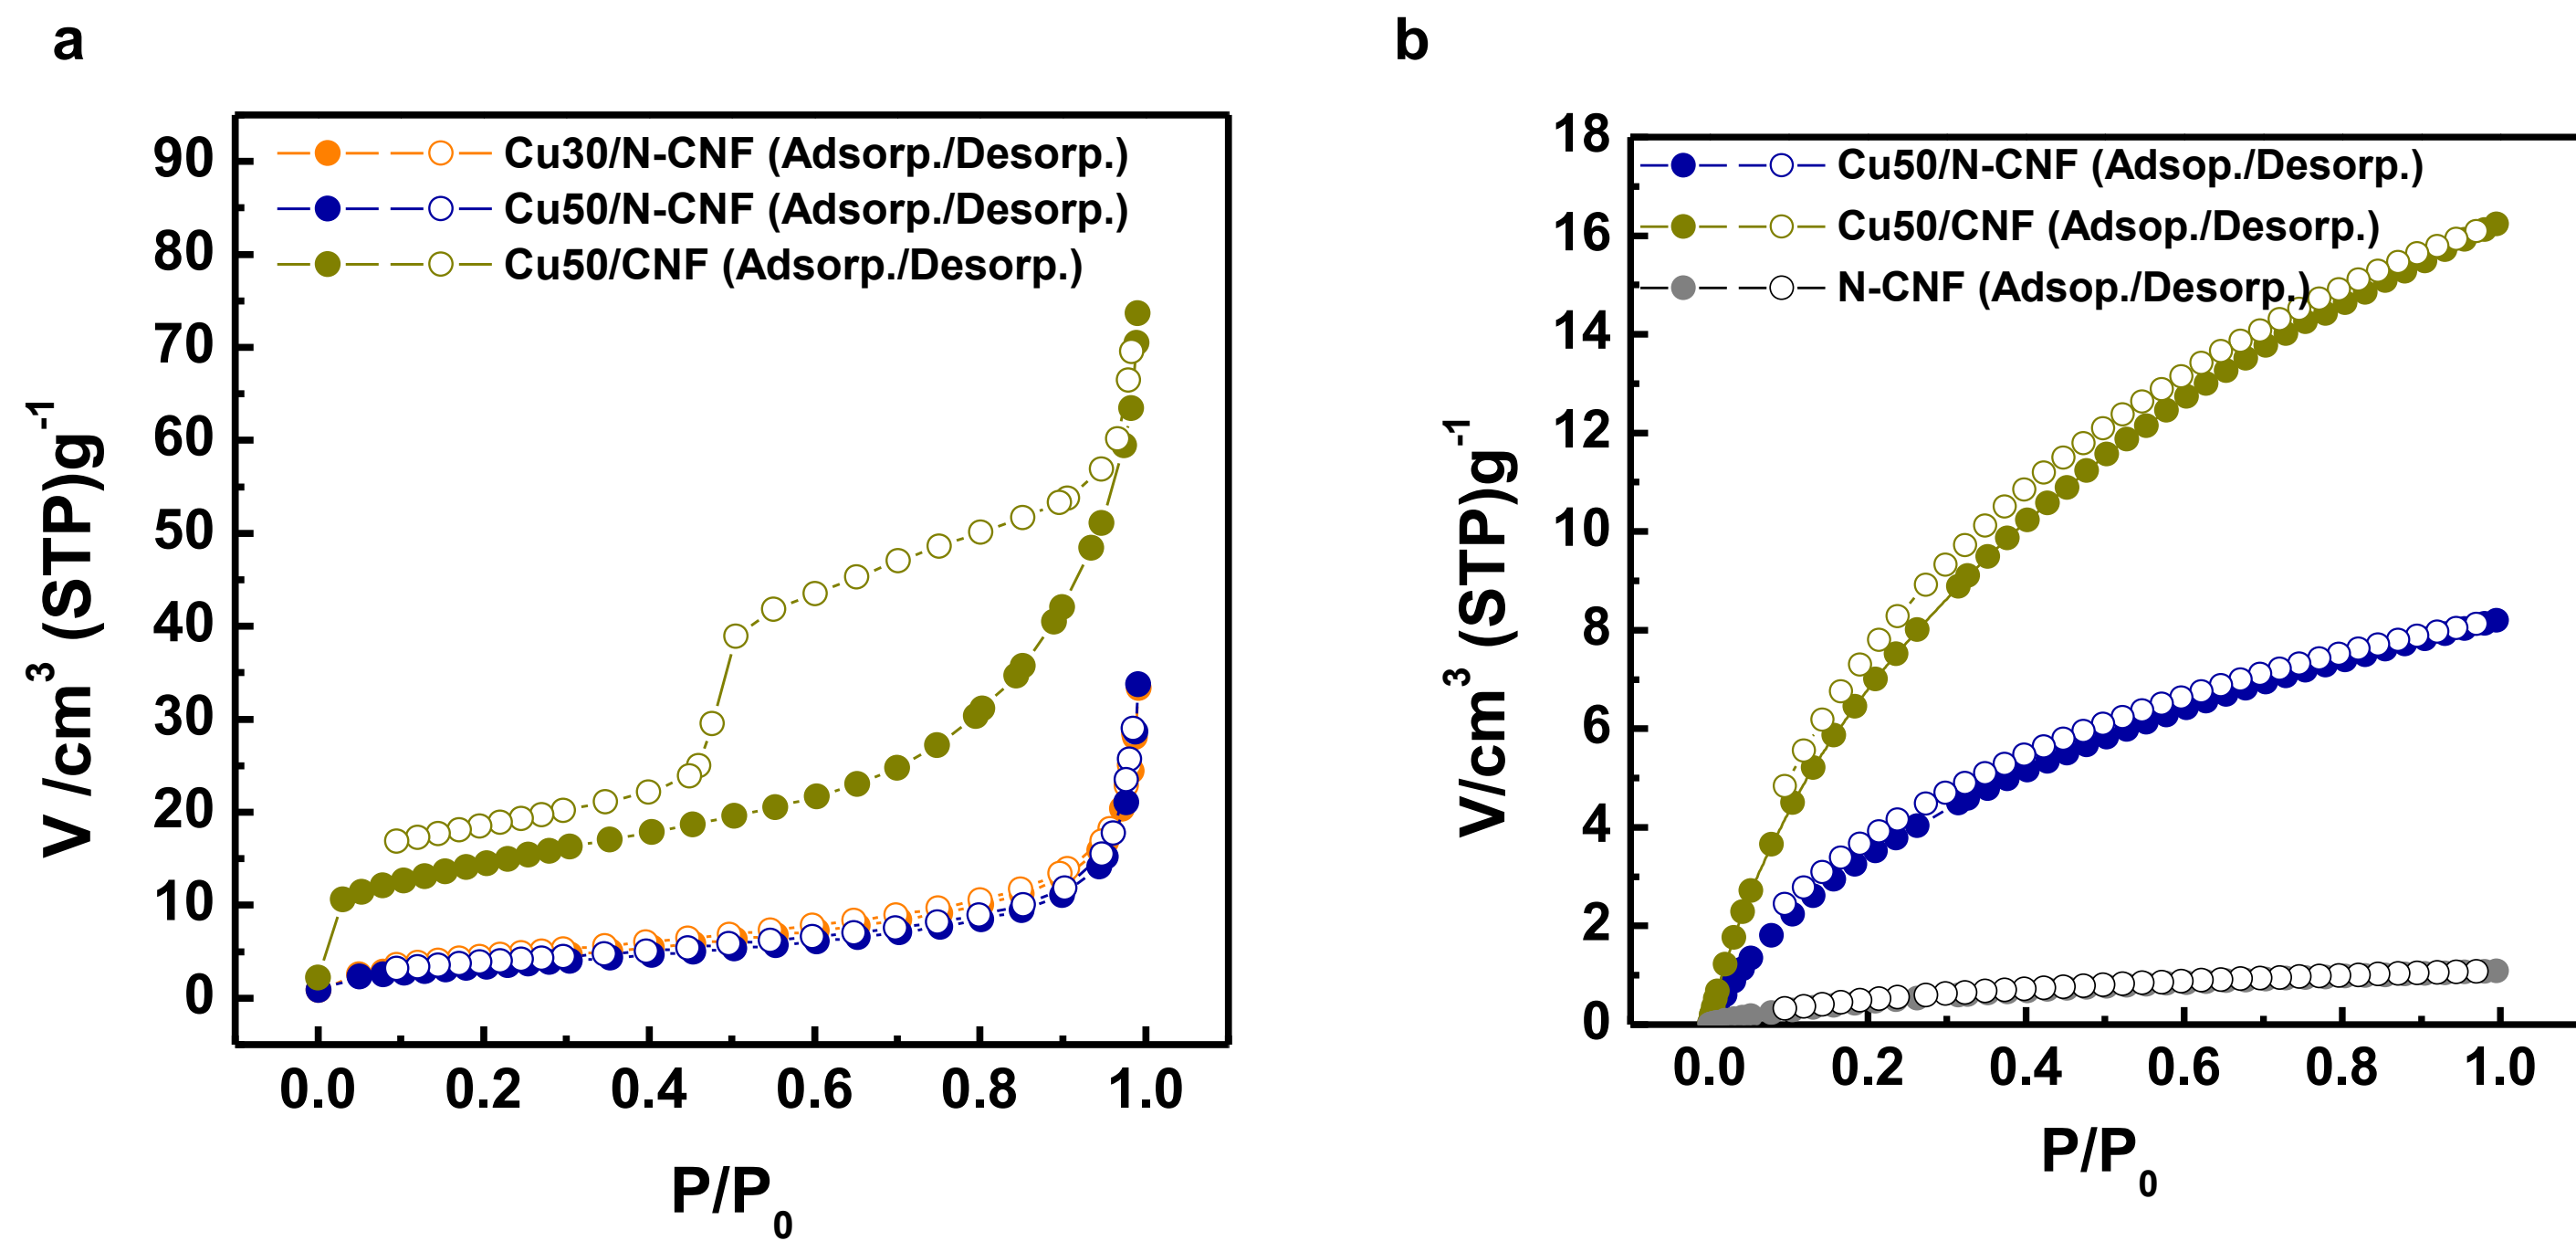

**Fig. S8** Brunauer-Emmett-Teller (BET) specific surface area measured by (a)  $\text{N}_2$  and (b)  $\text{CO}_2$  gas.

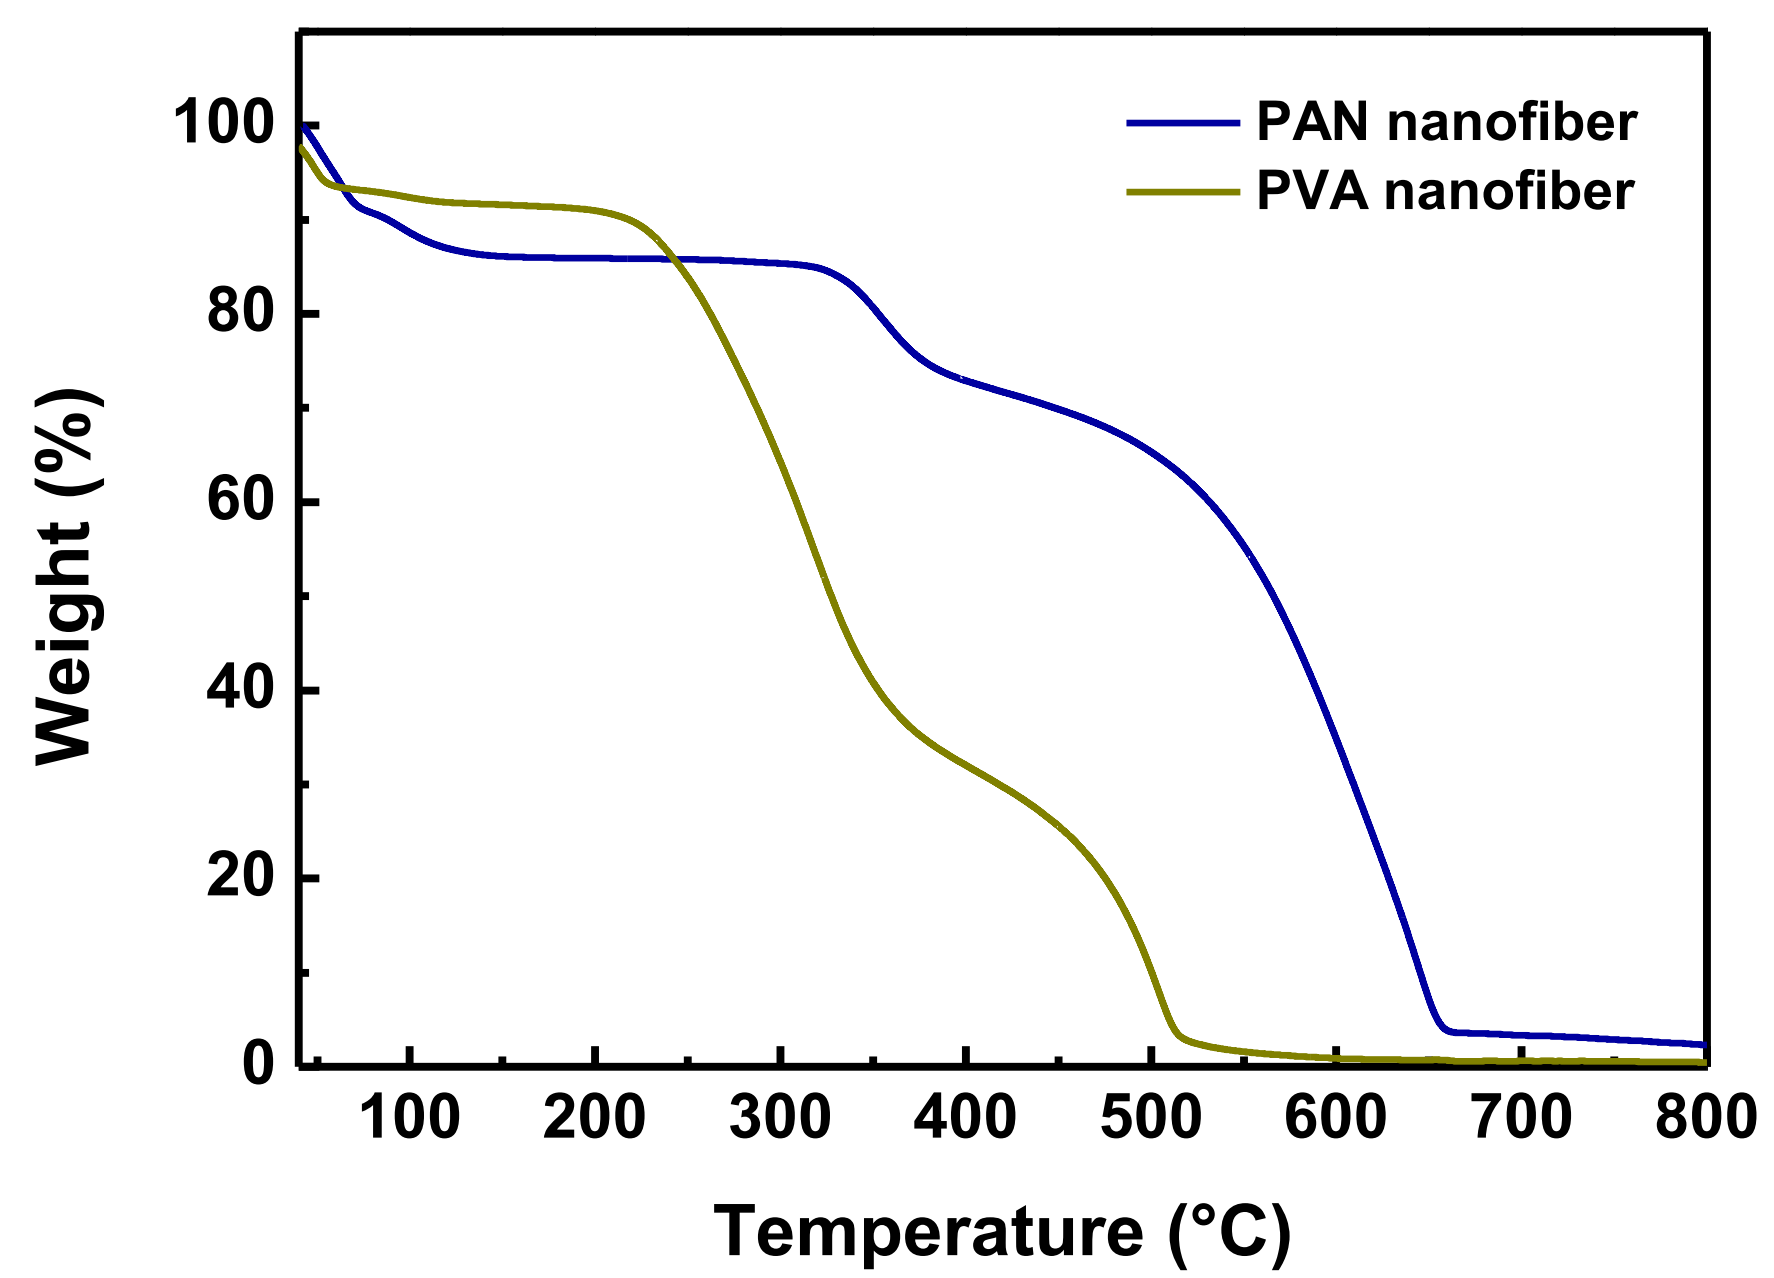

**Fig. S9** TGA curves of PAN and PVA nanofibers.

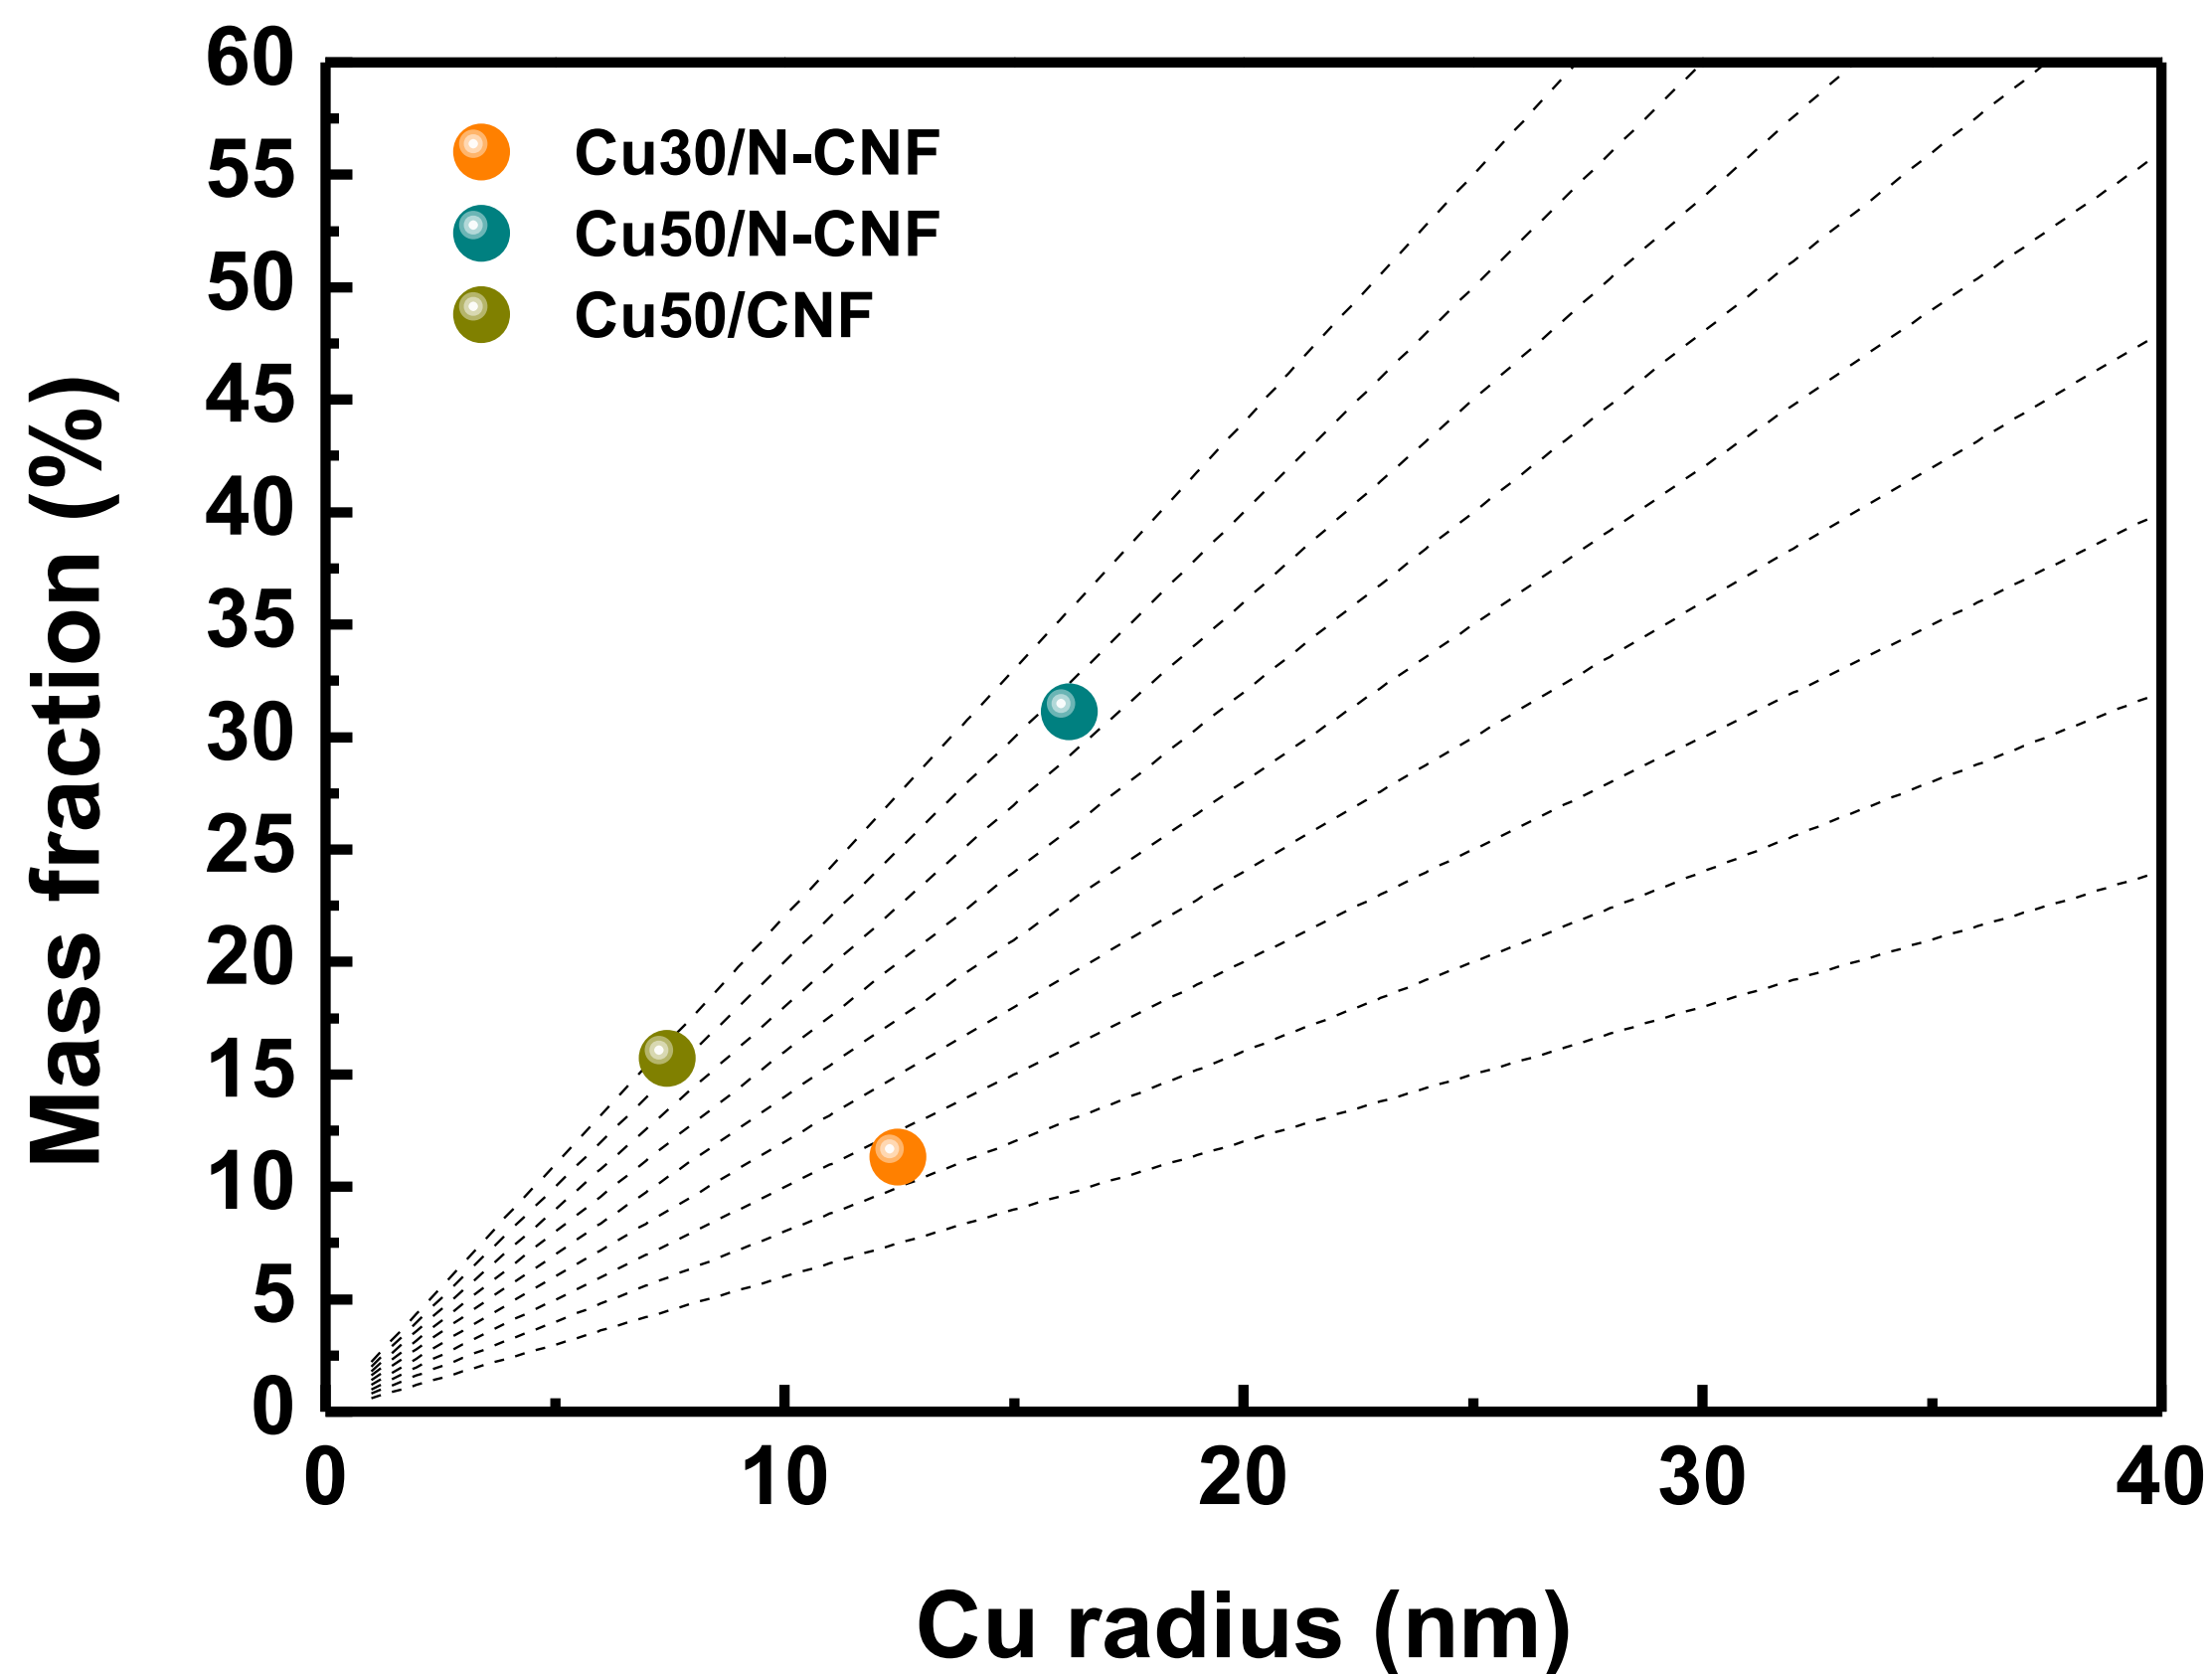

**Fig. S10** Map of Cu radius – Cu mass fraction of Cu/(N)-CNF catalyst.

Assuming that the copper particle is sphere, surface area of copper particle and mass of copper are given as below: ( $n$  = The number of particles,  $r$  = Radius of copper particle,  $S$  = total surface area of copper particle,  $\mu$  = Density of copper,  $\alpha$  = Mass fraction of copper,  $M$  = Mass of catalyst)

$$S = n(4\pi r^2) \quad (\text{Eq. 1})$$

$$M_\alpha = n\mu \left( \frac{4}{3} \pi r^3 \right) = \alpha M \quad (\text{Eq. 2})$$

and Eq. 3 can be derived by Eq. 2. Moreover, Eq.4 and Eq.5 formed by Eq. 1 and Eq. 3 which is derived by Eq.2 as follows:

$$n = \frac{3\alpha M}{4\mu\pi r^3} \quad (\text{Eq. 3})$$

$$S = \frac{3\alpha M}{\mu r} \quad (\text{Eq. 4})$$

$$\alpha = \left( \frac{\mu S}{3M} \right) r = kr \quad (\text{Eq. 5})$$

When we plot the mass fraction of copper and radius of copper particle, it is confirmed that the slope is proportional to the total surface area of copper particle.

$$k = \frac{\mu}{3M} S \quad (\text{Eq. 6})$$



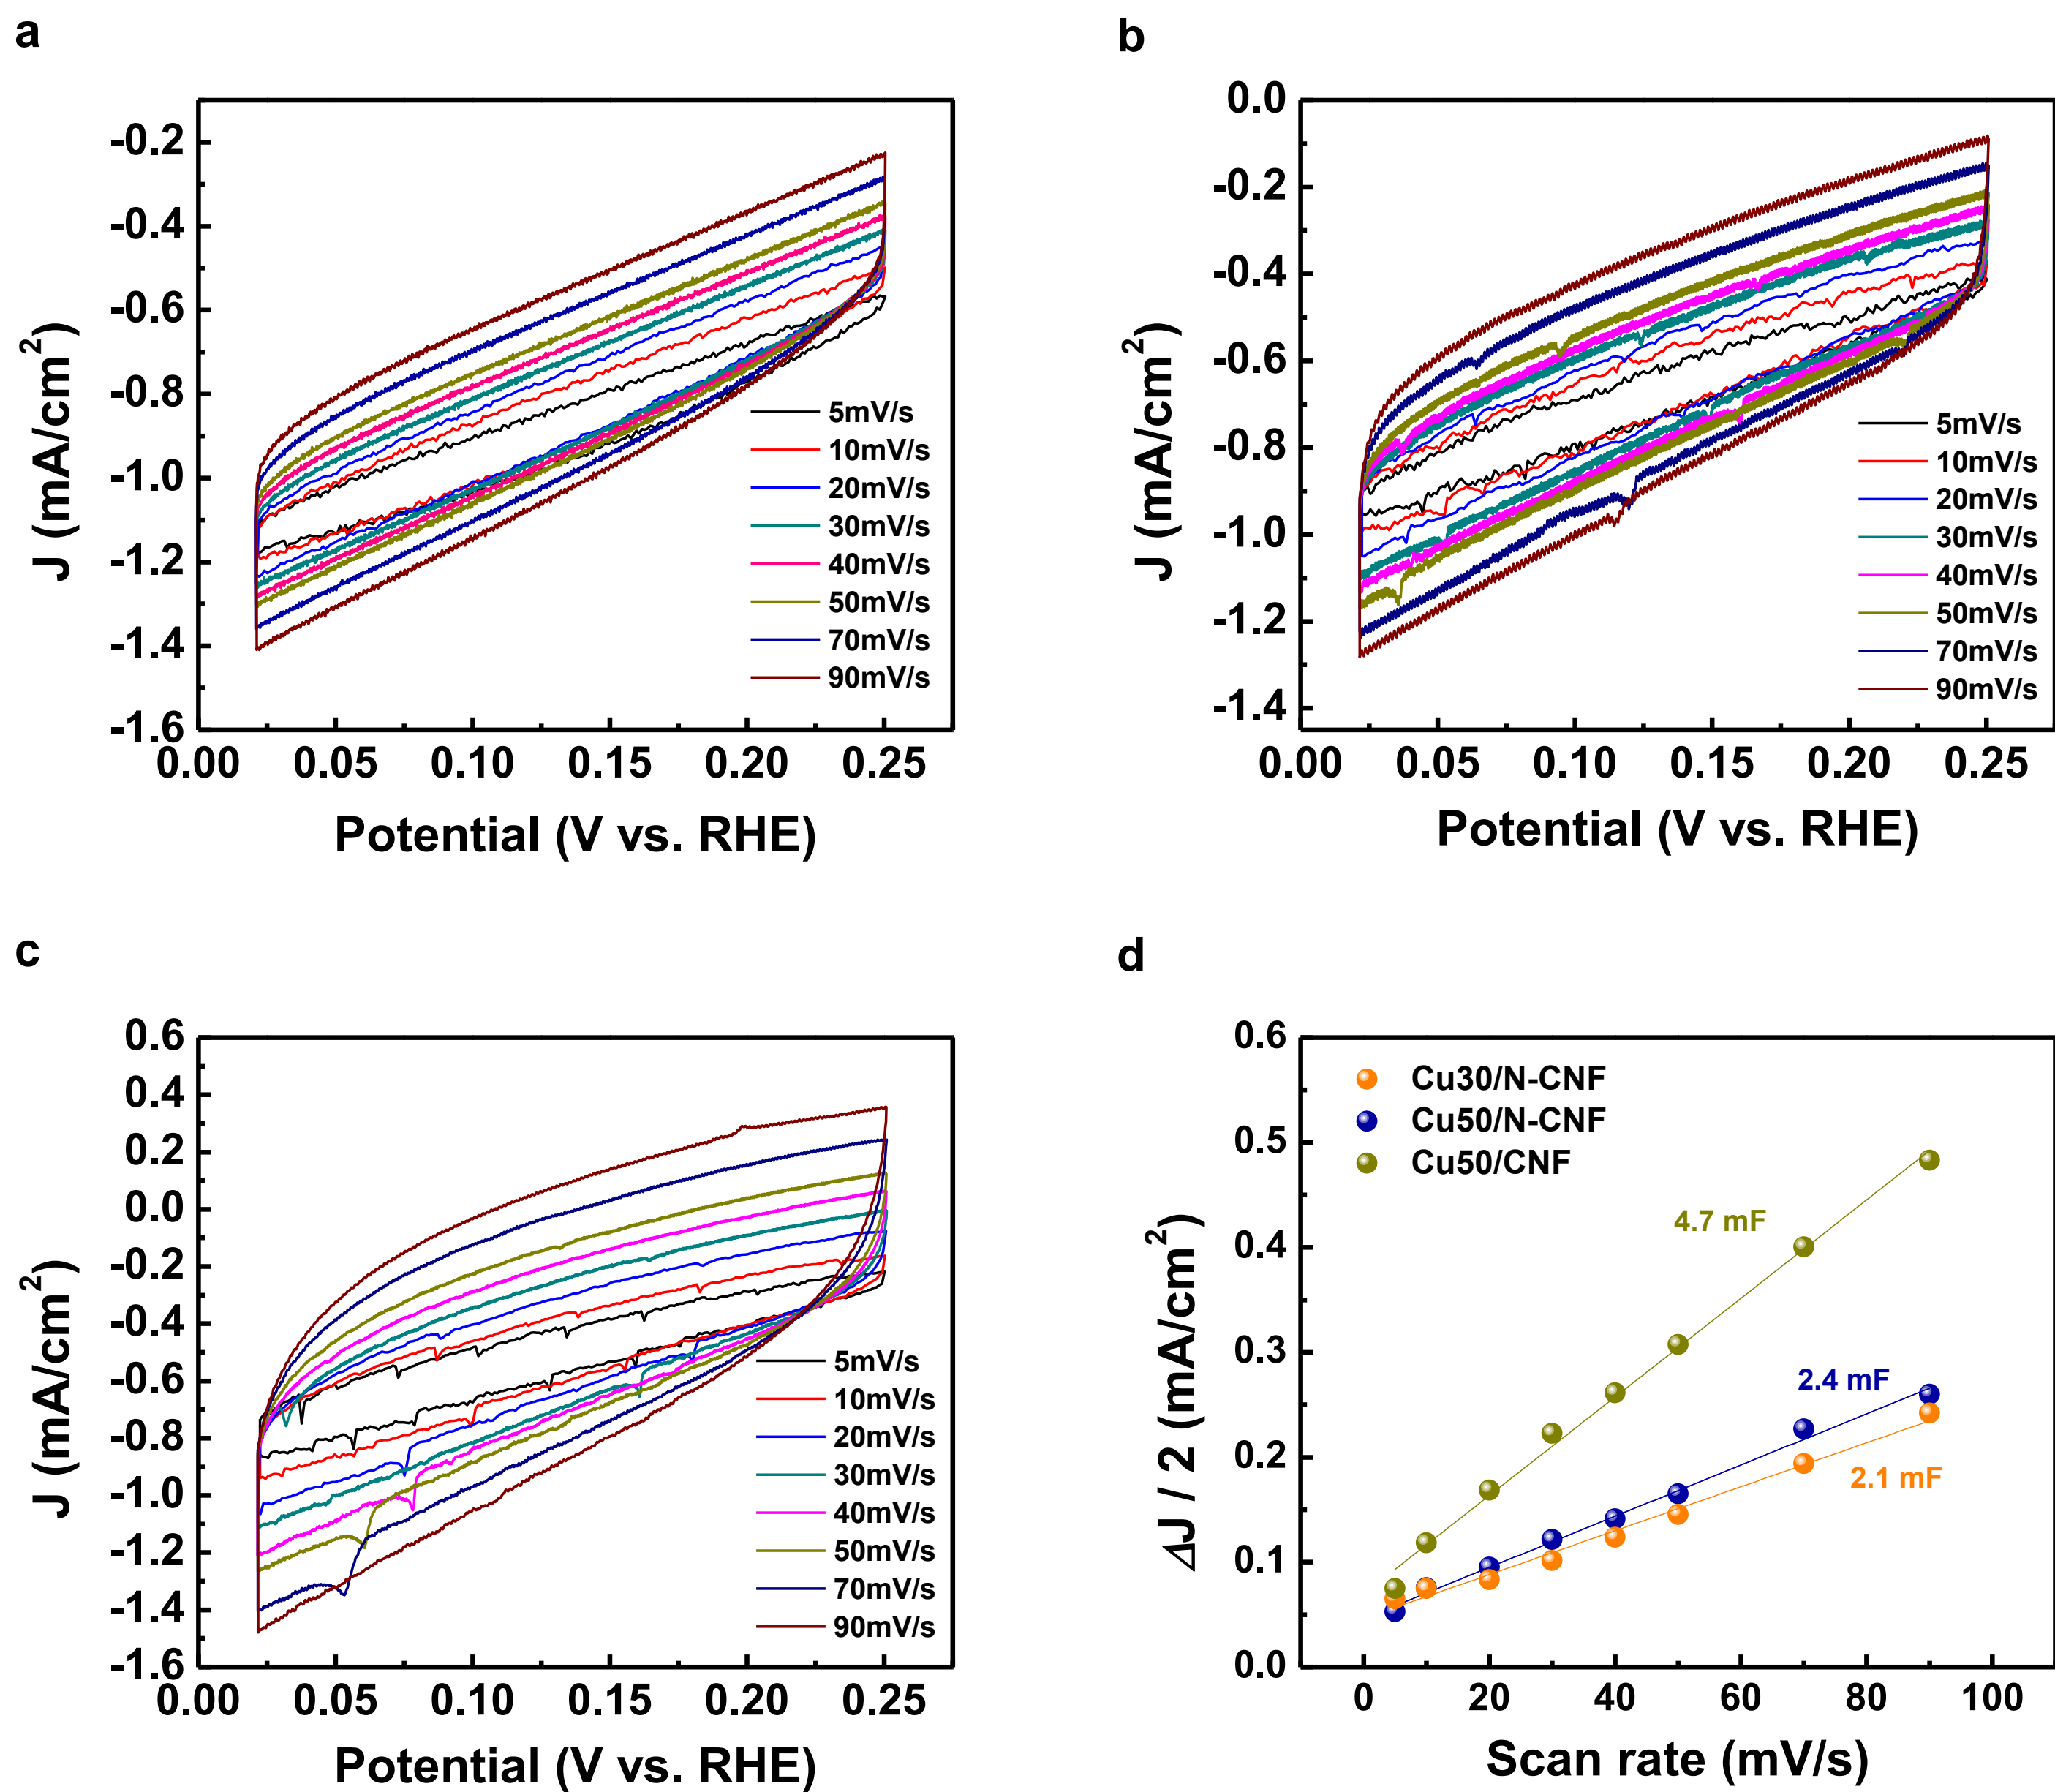

**Fig. S11** Cyclic voltammograms of (a) Cu30/N-CNF, (b) Cu50/N-CNF, and (c) Cu50/CNF, and (d) determination of double layer capacitance of Cu30/N-CNF, Cu50/N-CNF, and Cu50/CNF.

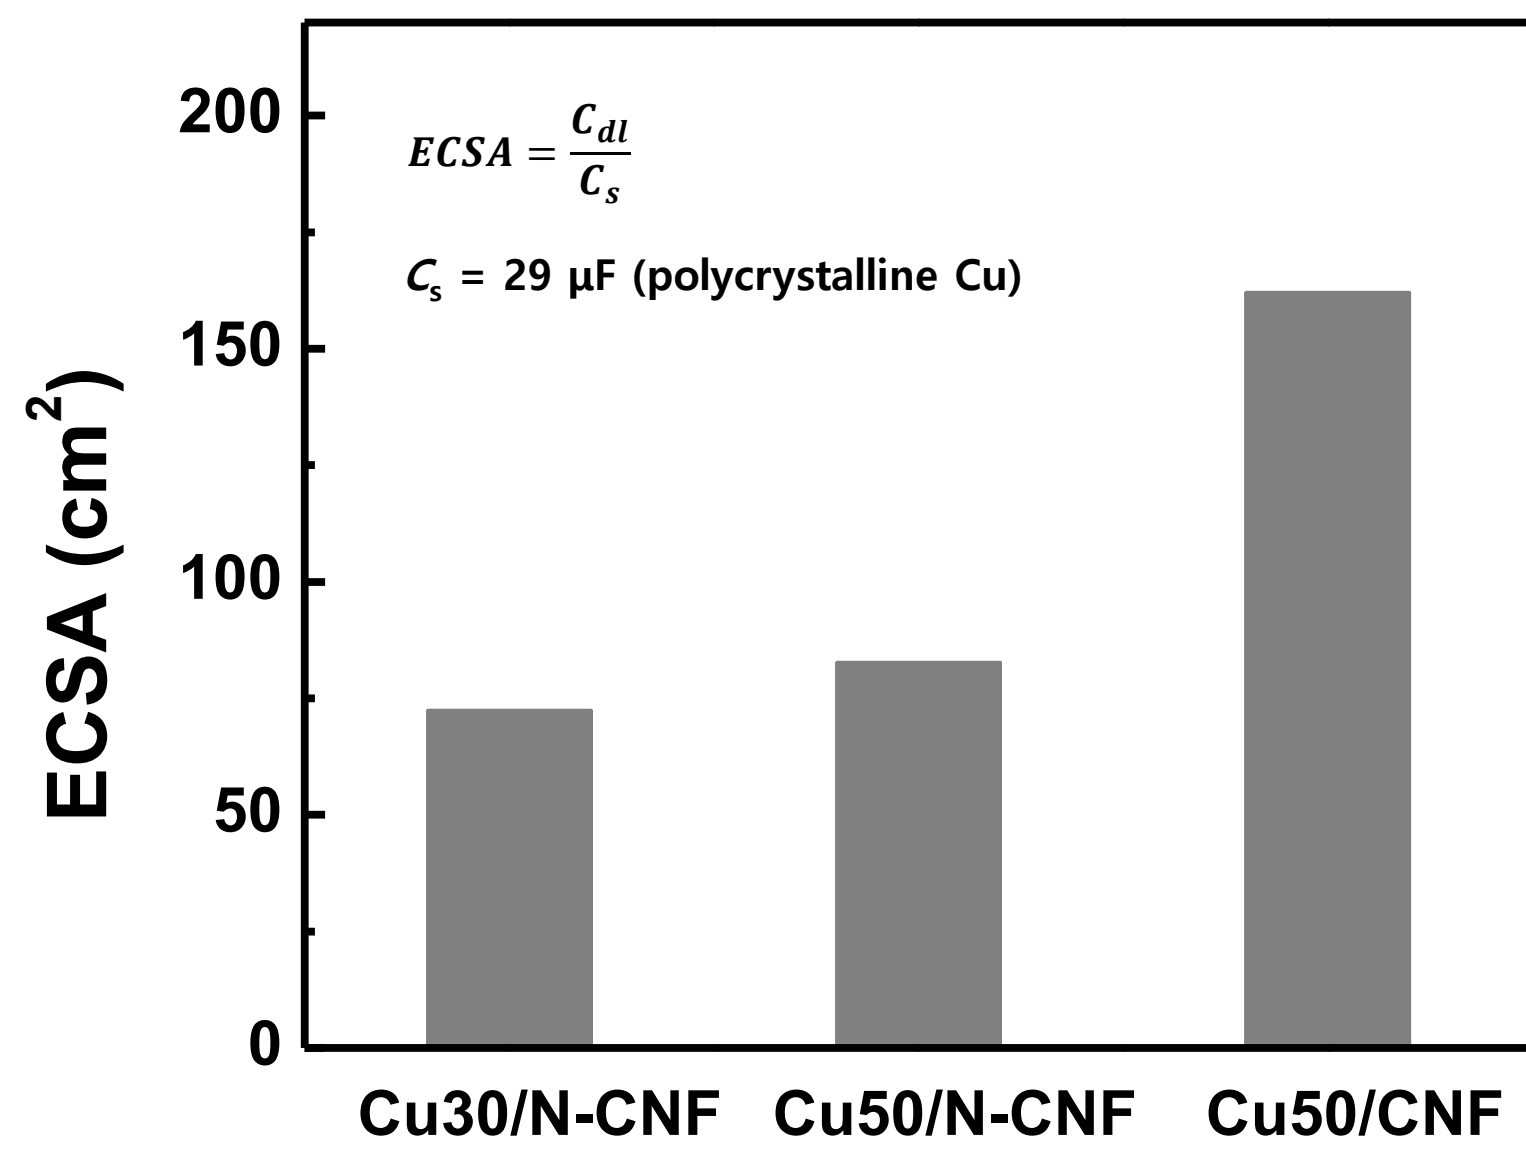

**Fig. S12** Electrochemical surface area of Cu/N-CNF and Cu/CNF catalysts

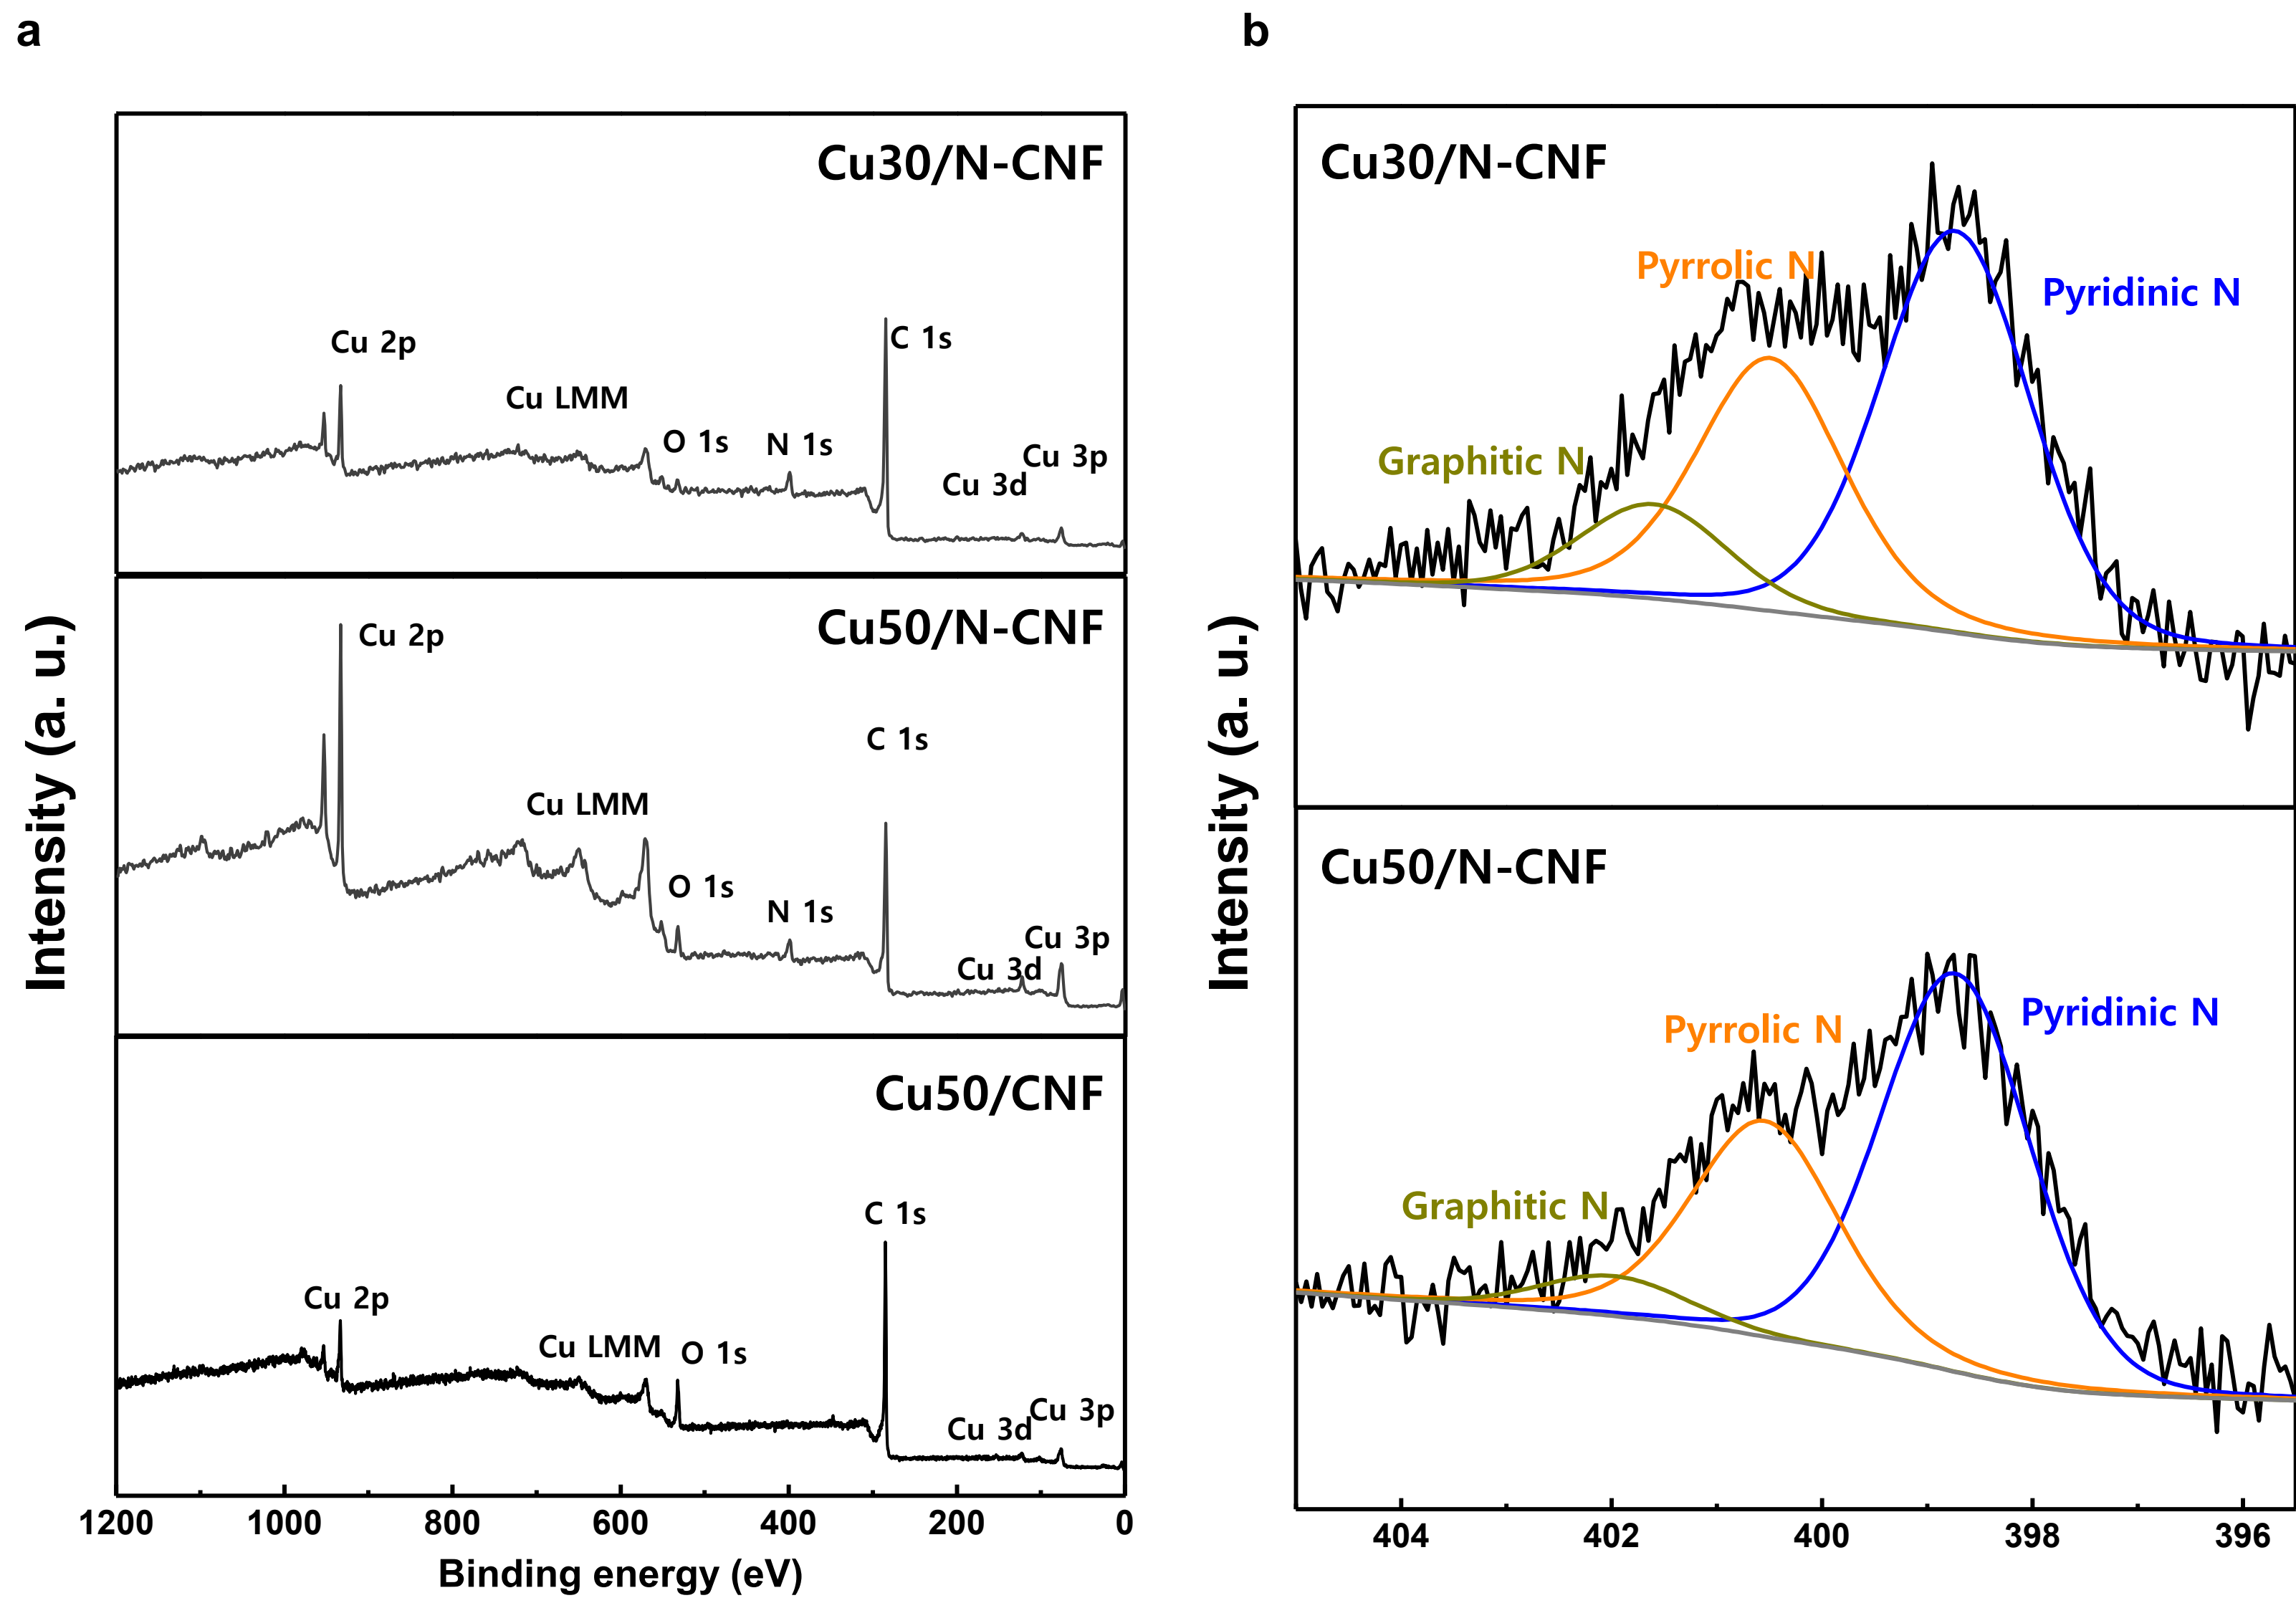

**Fig. S13** (a) XPS survey spectra, (b) deconvolution of XPS N1s spectra of Cu30/N-CNF and Cu50/N-CNF, and (c) pyridinic N/Cu ratio of Cu30/N-CNF, Cu50/N-CNF



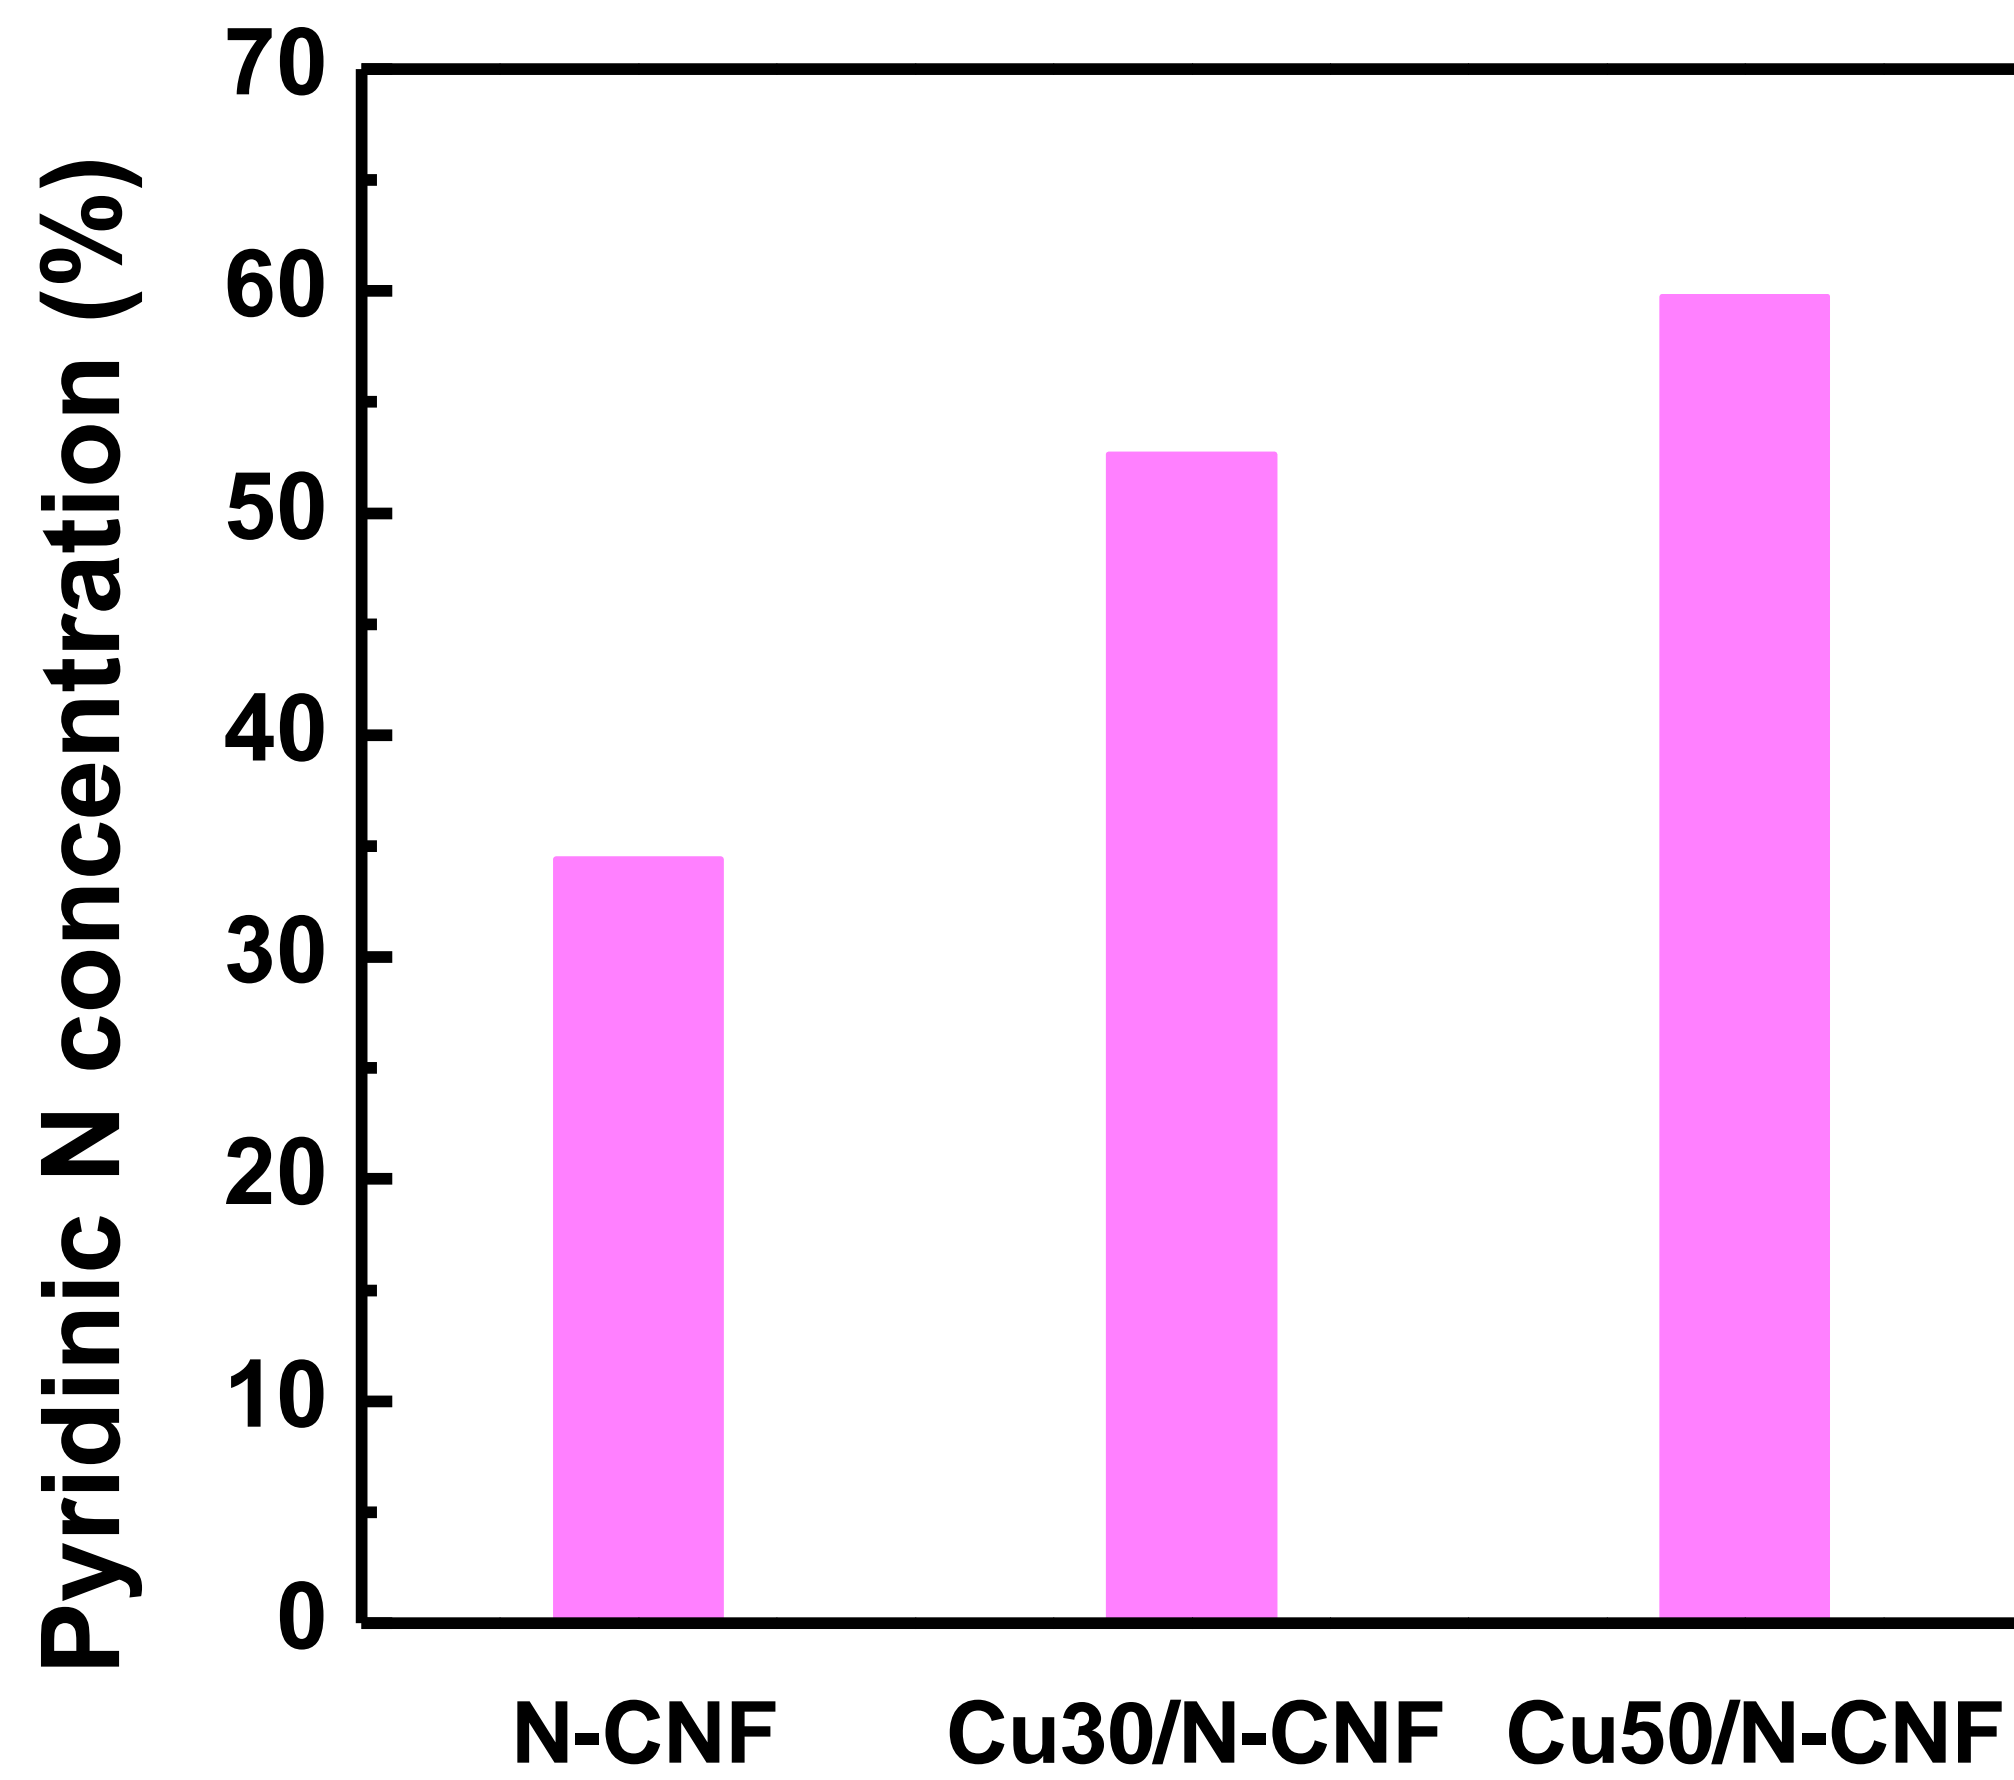

**Fig. S14** Pyridinic N concentration of N-CNF, Cu30/N-CNF, and Cu50/N-CNF catalysts



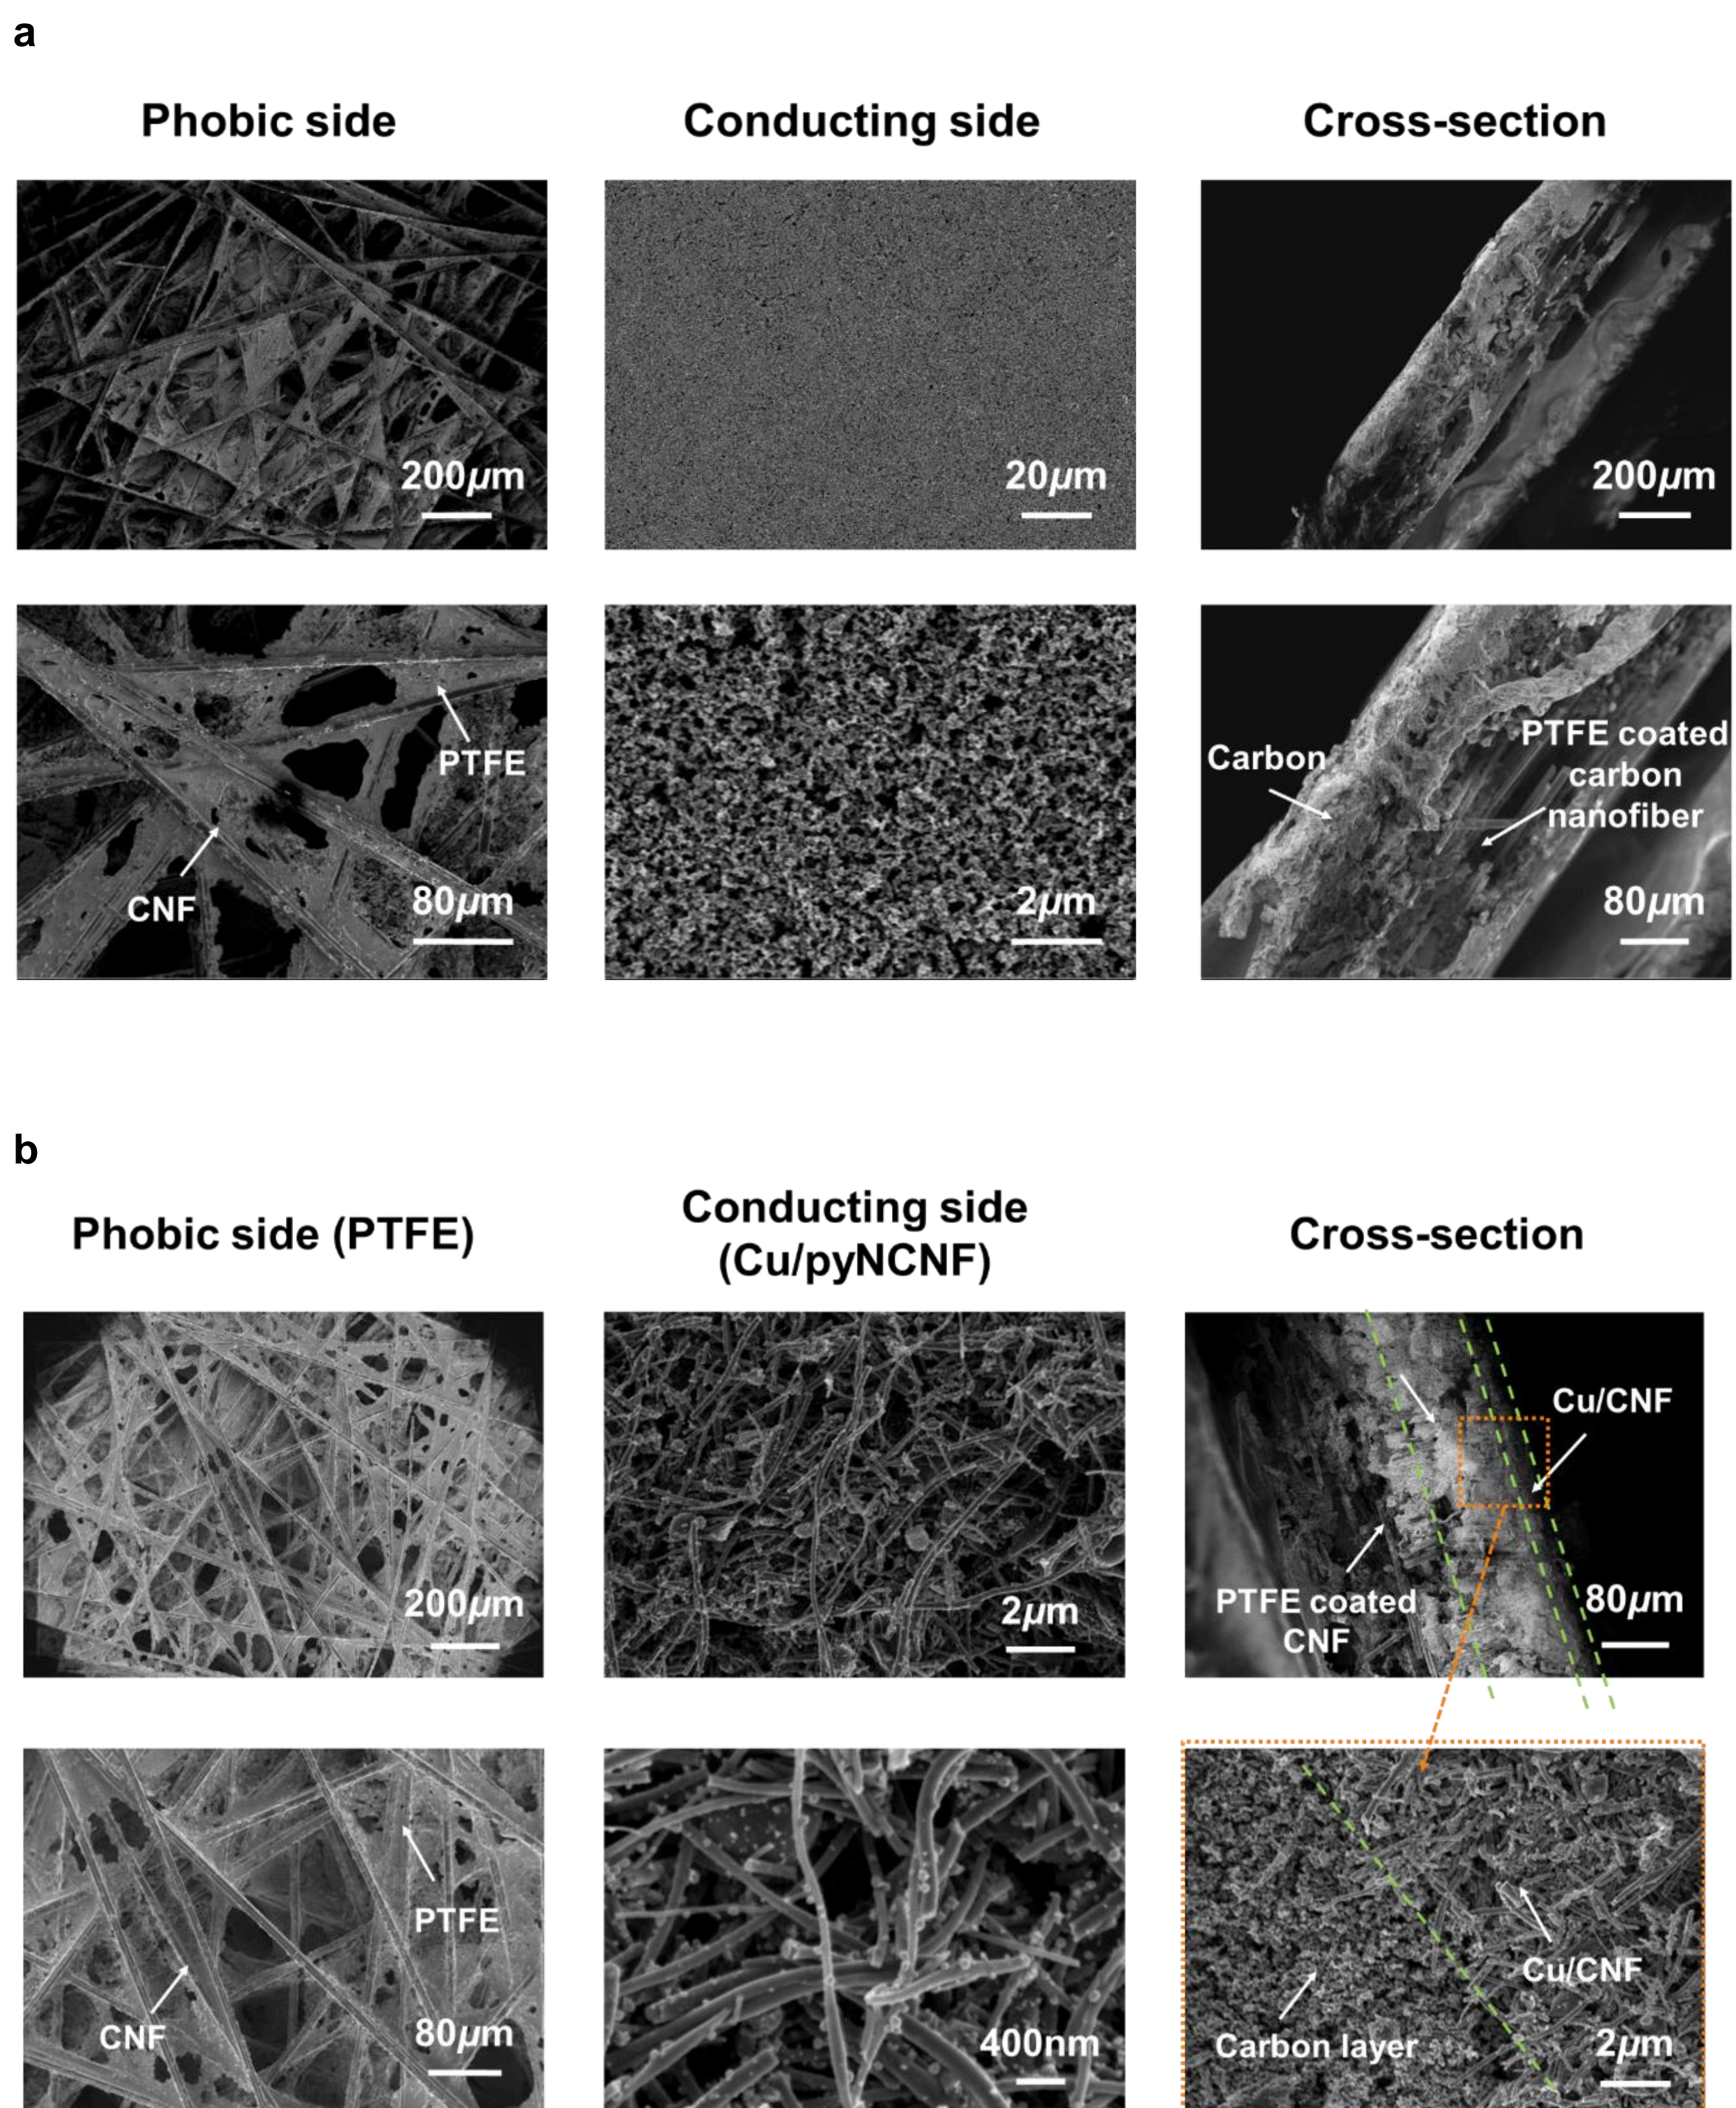

**Fig. S15** SEM images of (a) bare and (b) Cu50/N-CNF coated GDE



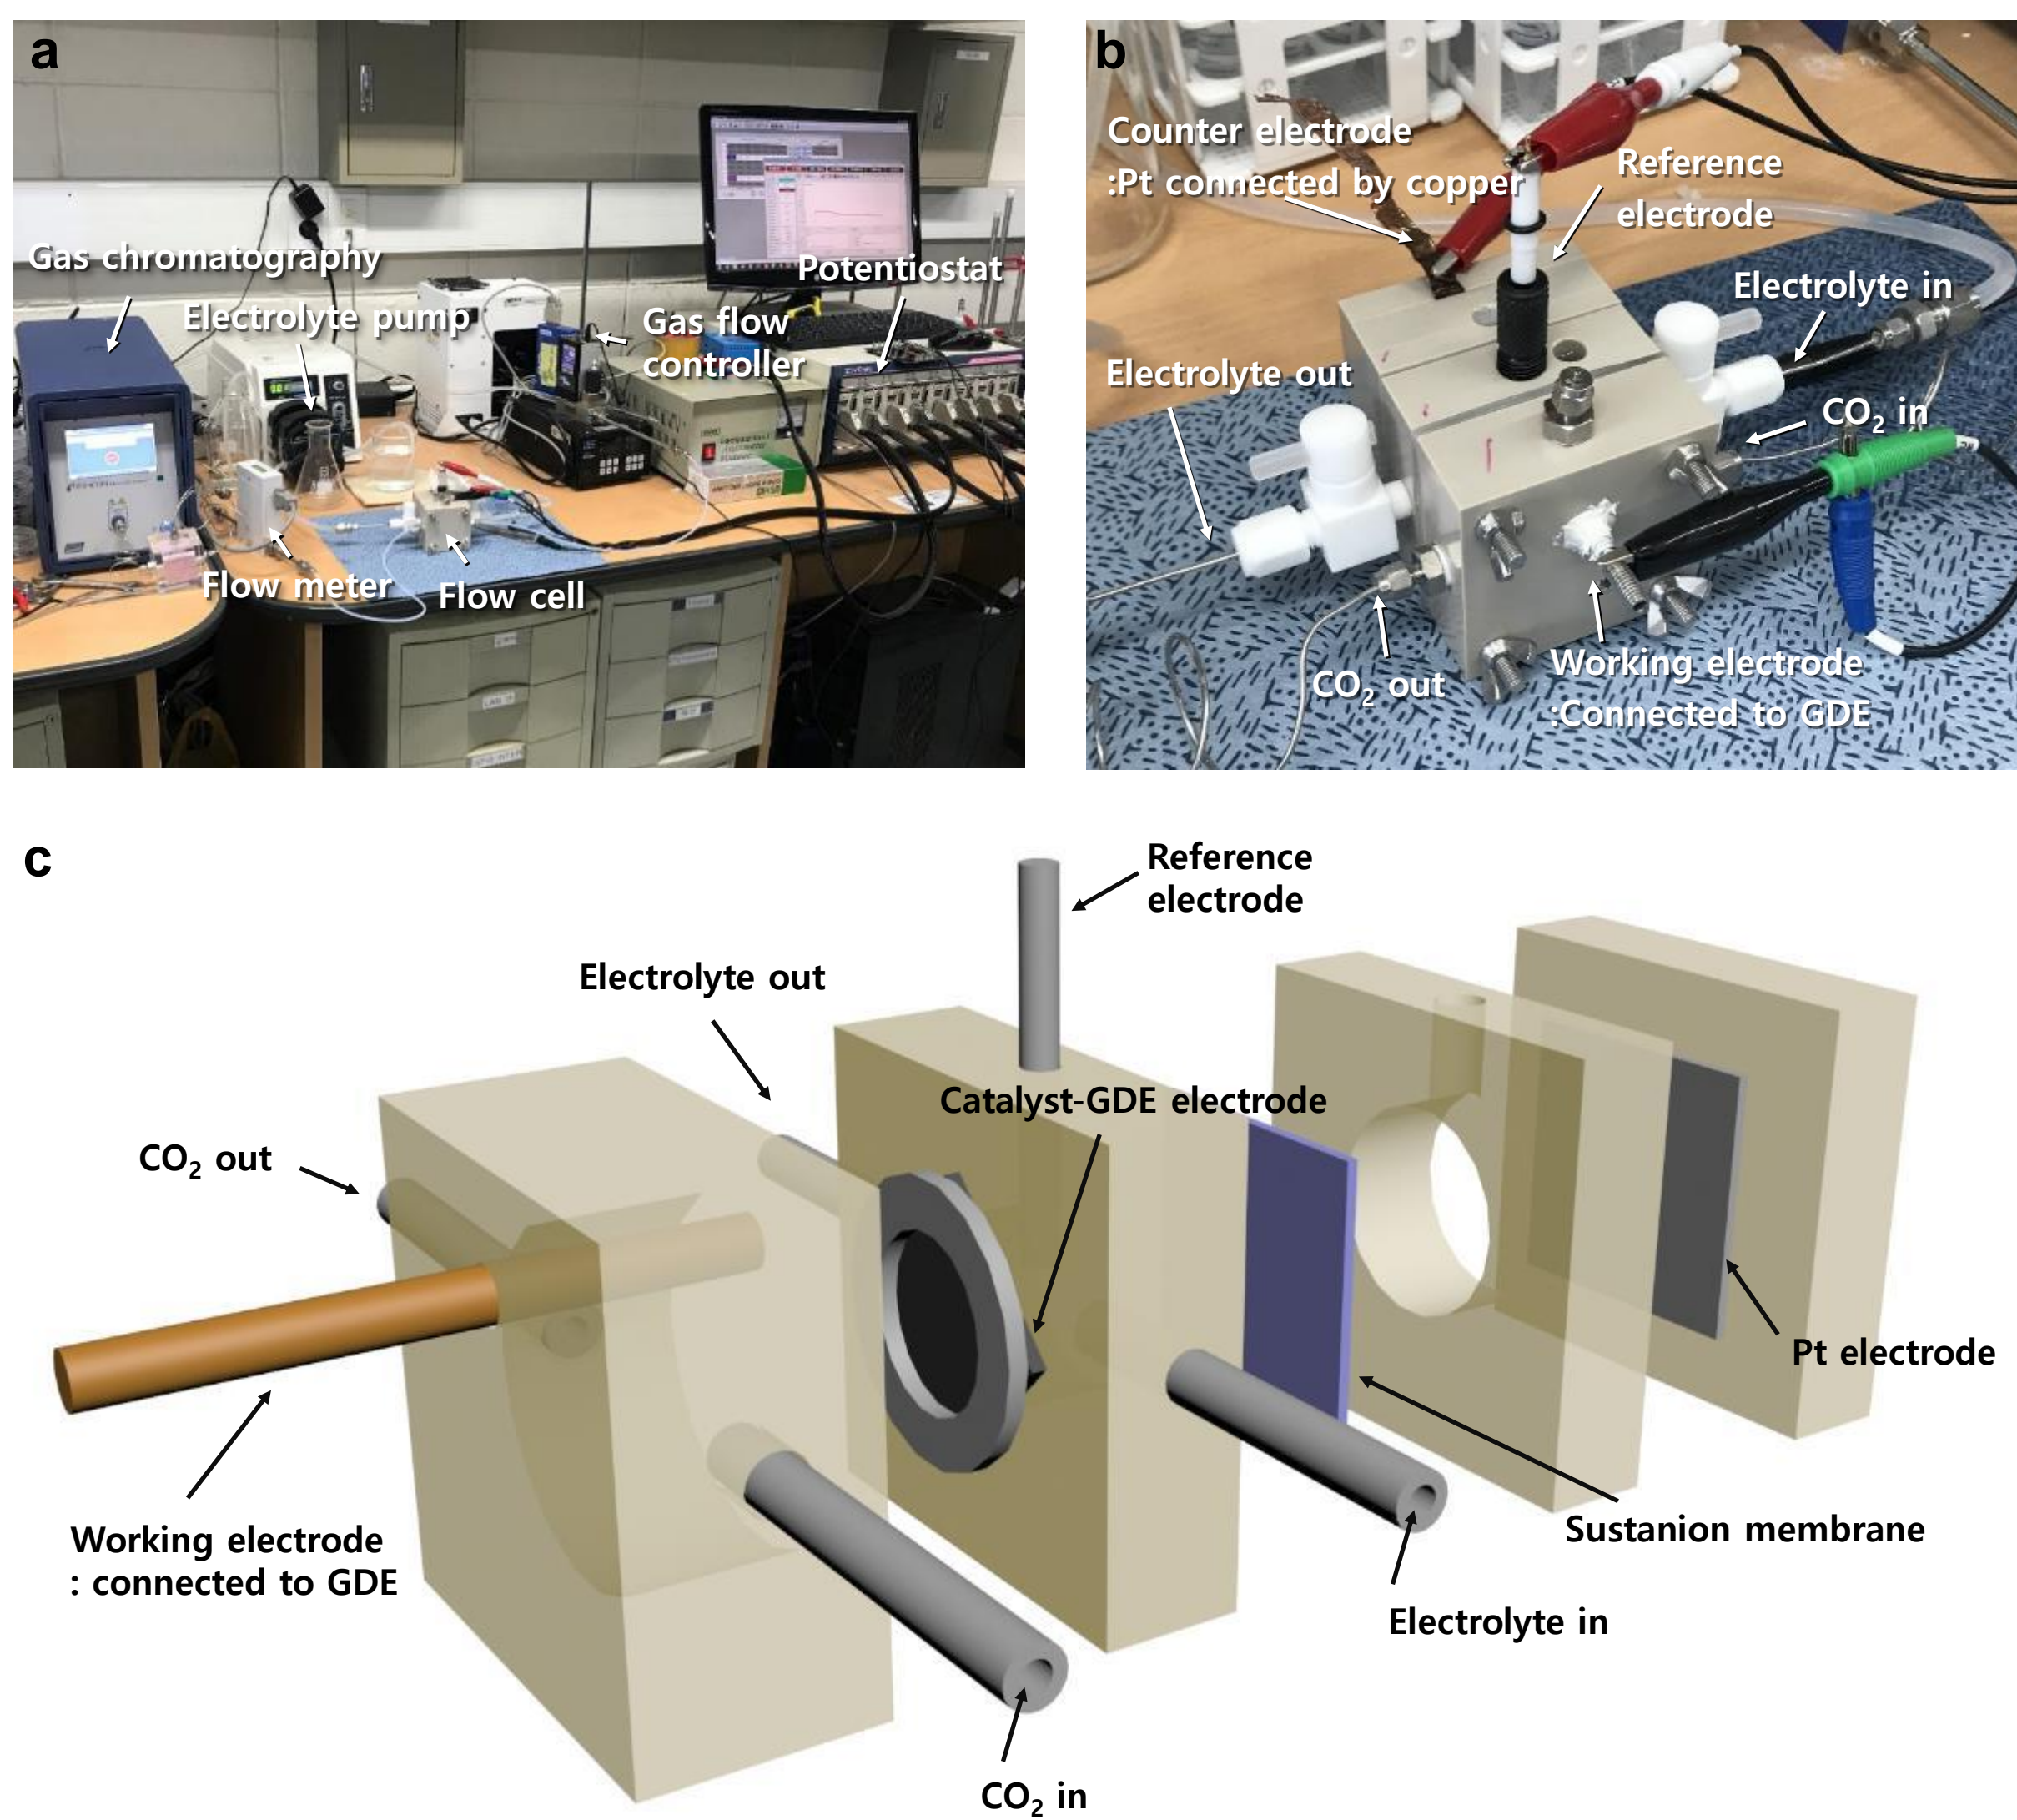

**Fig. S16** Images of (a) CO<sub>2</sub> reduction system and (b) flow cell reactor. (c) Schematics of flow cell reactor for electrochemical CO<sub>2</sub> reduction system



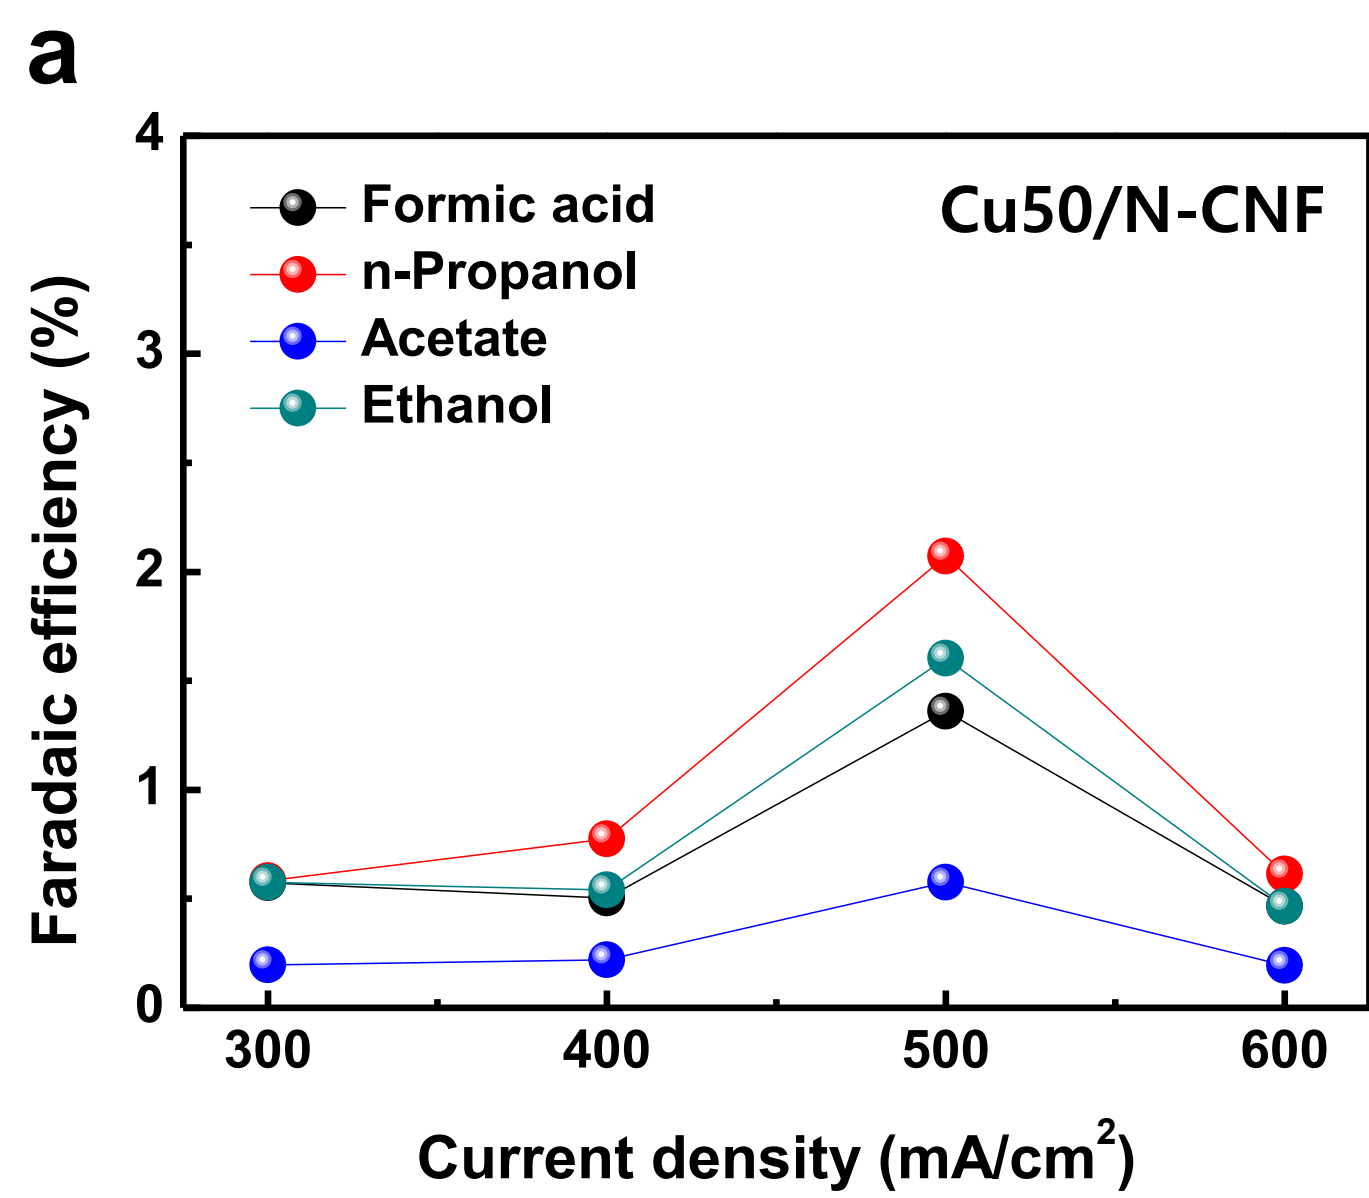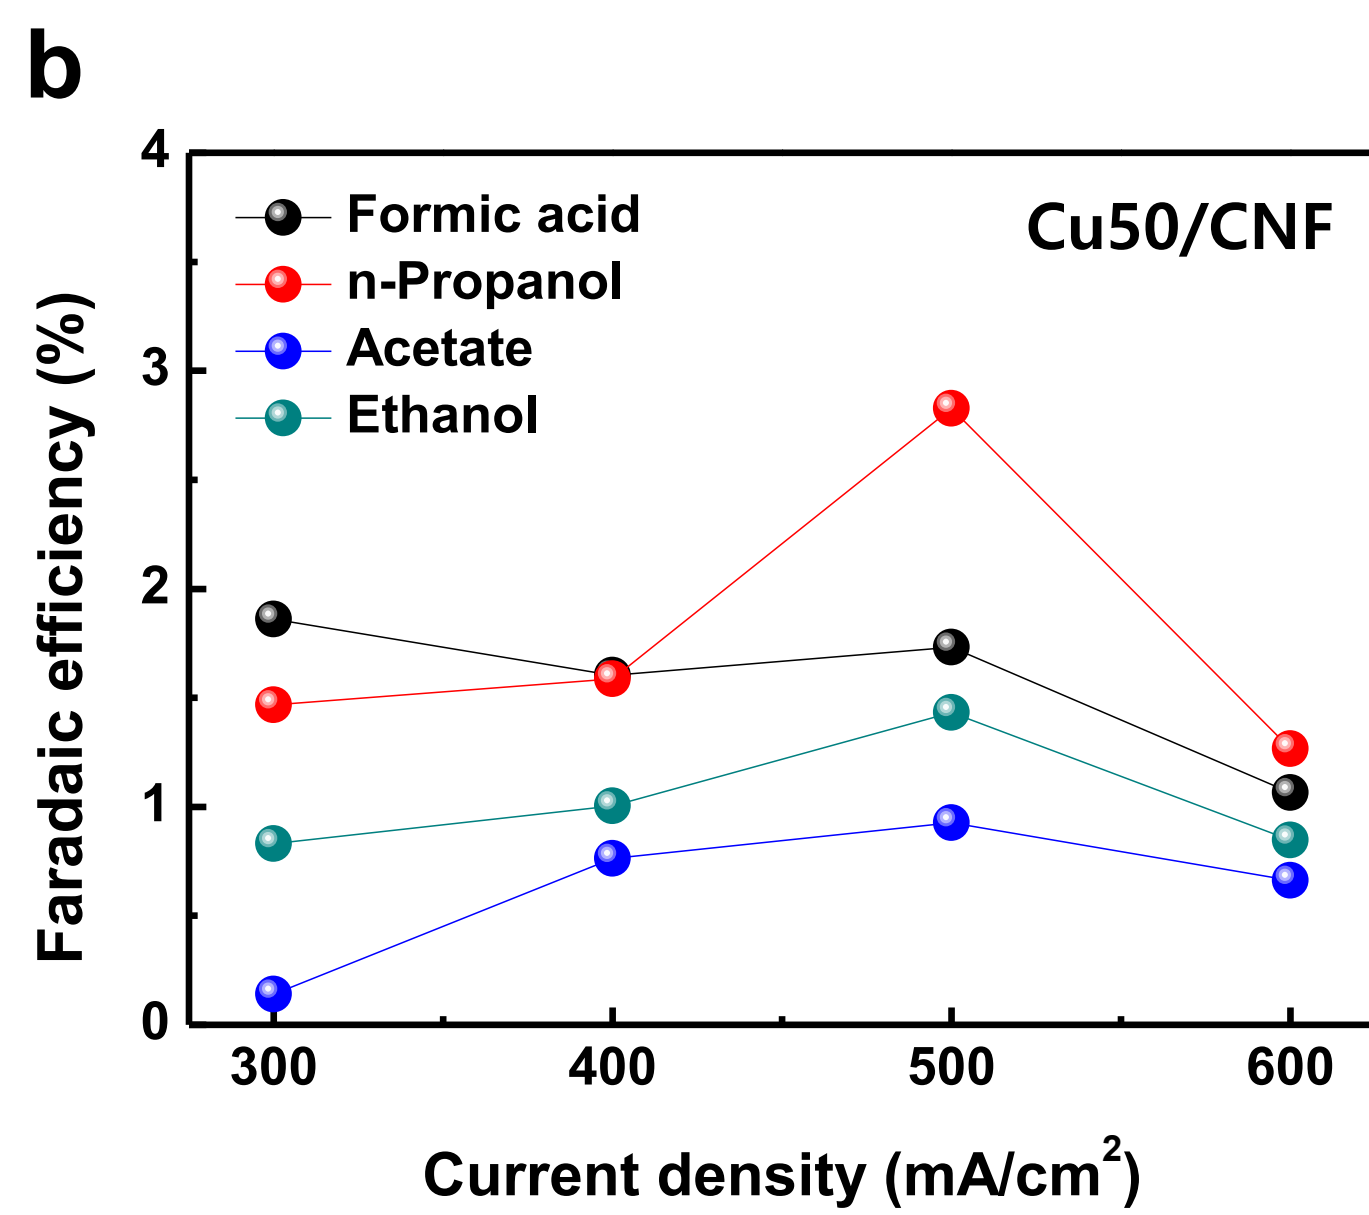

**Fig. S17** Faradaic efficiency of liquid products during CO<sub>2</sub>RR by (a) Cu50/N-CNF and (b) Cu50/CNF catalyst

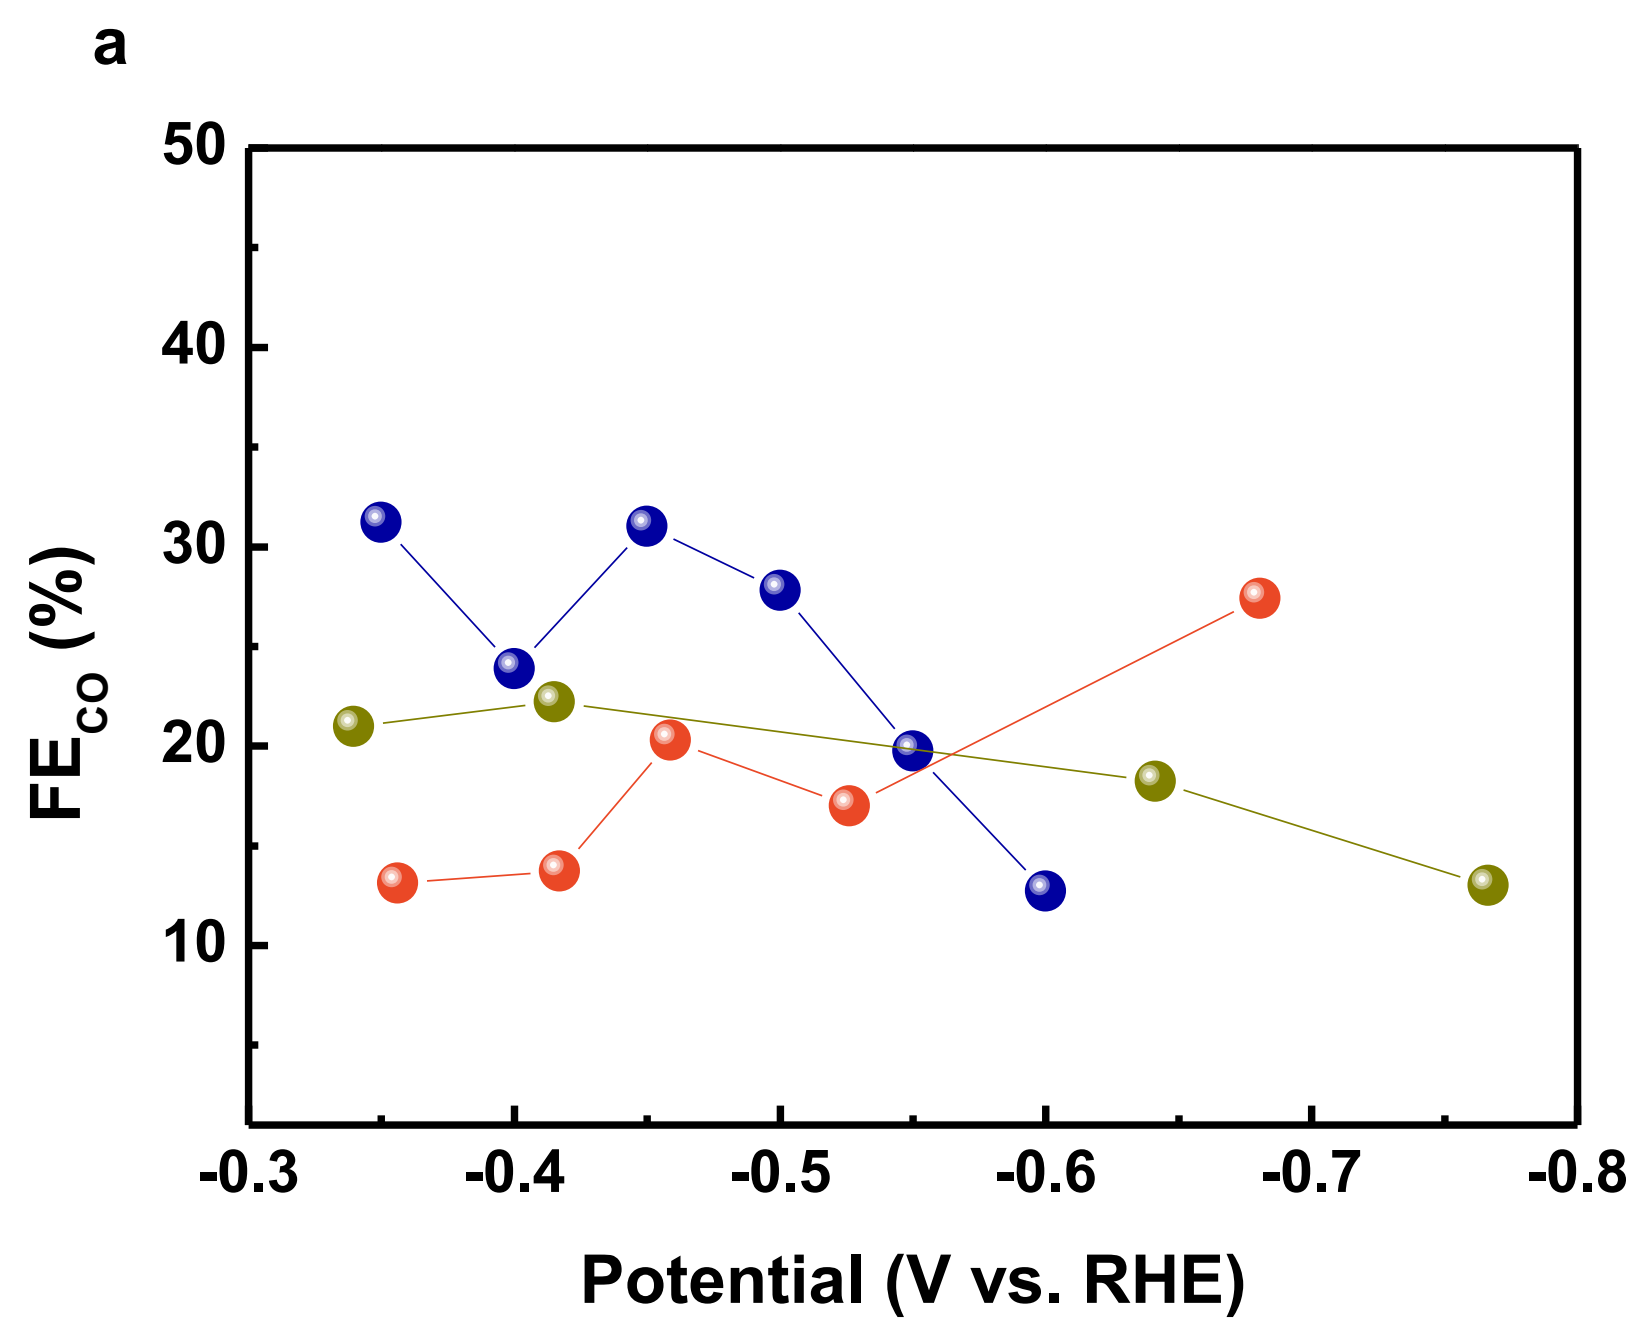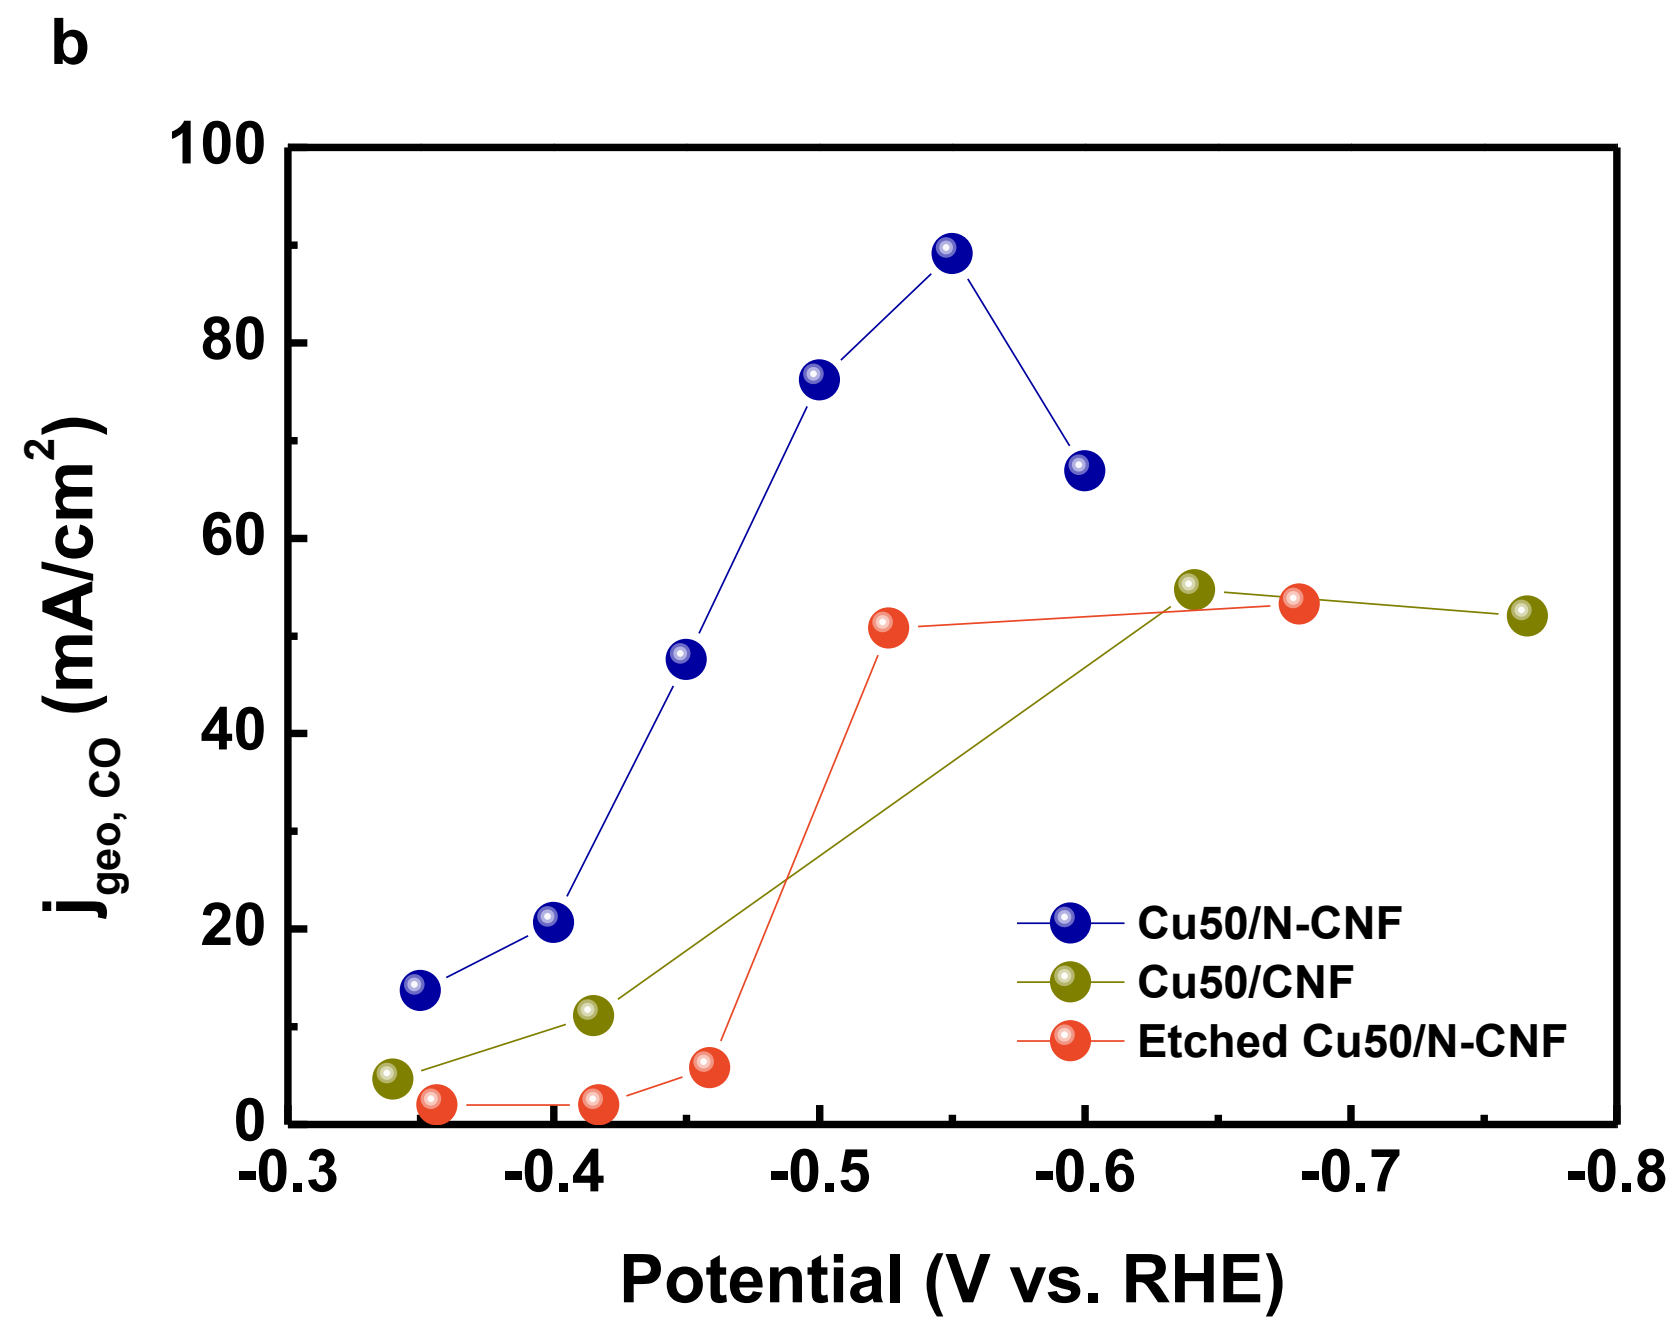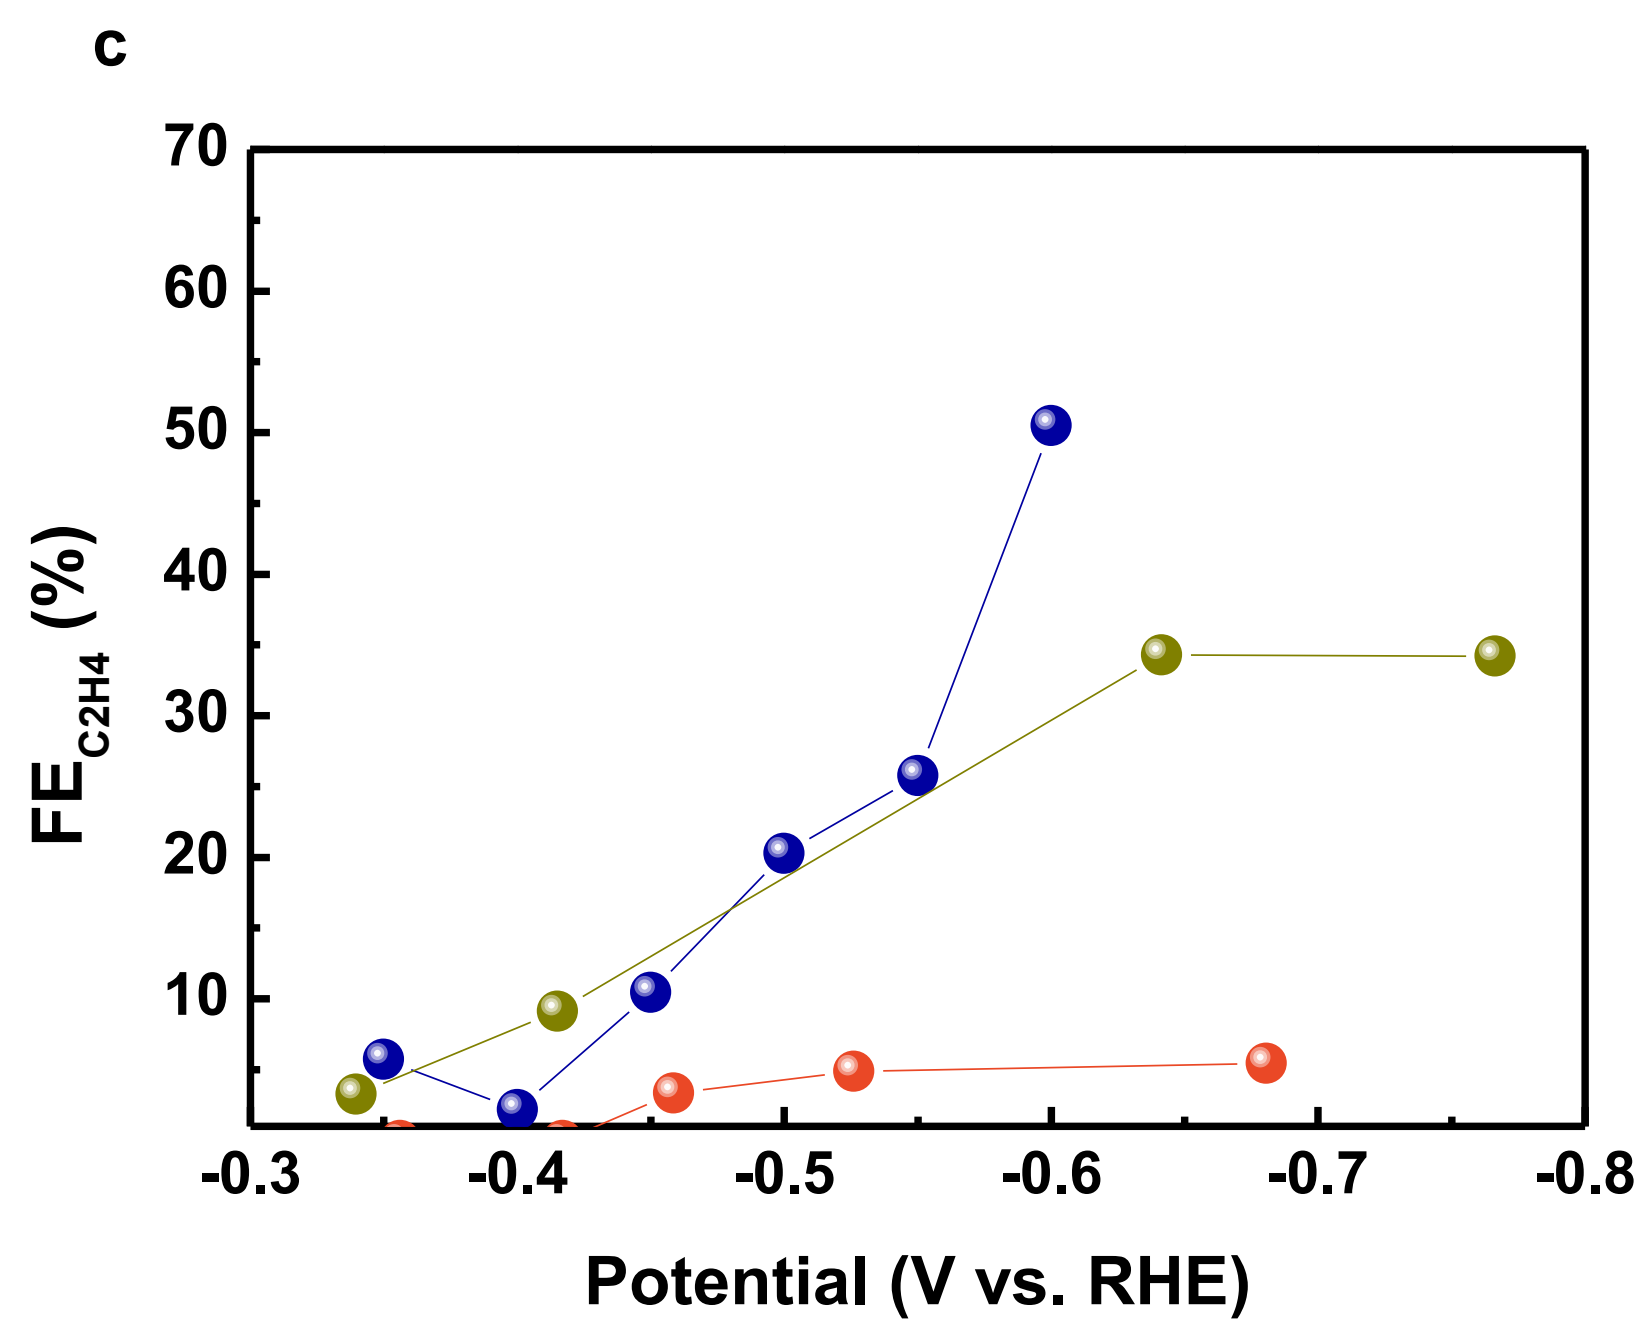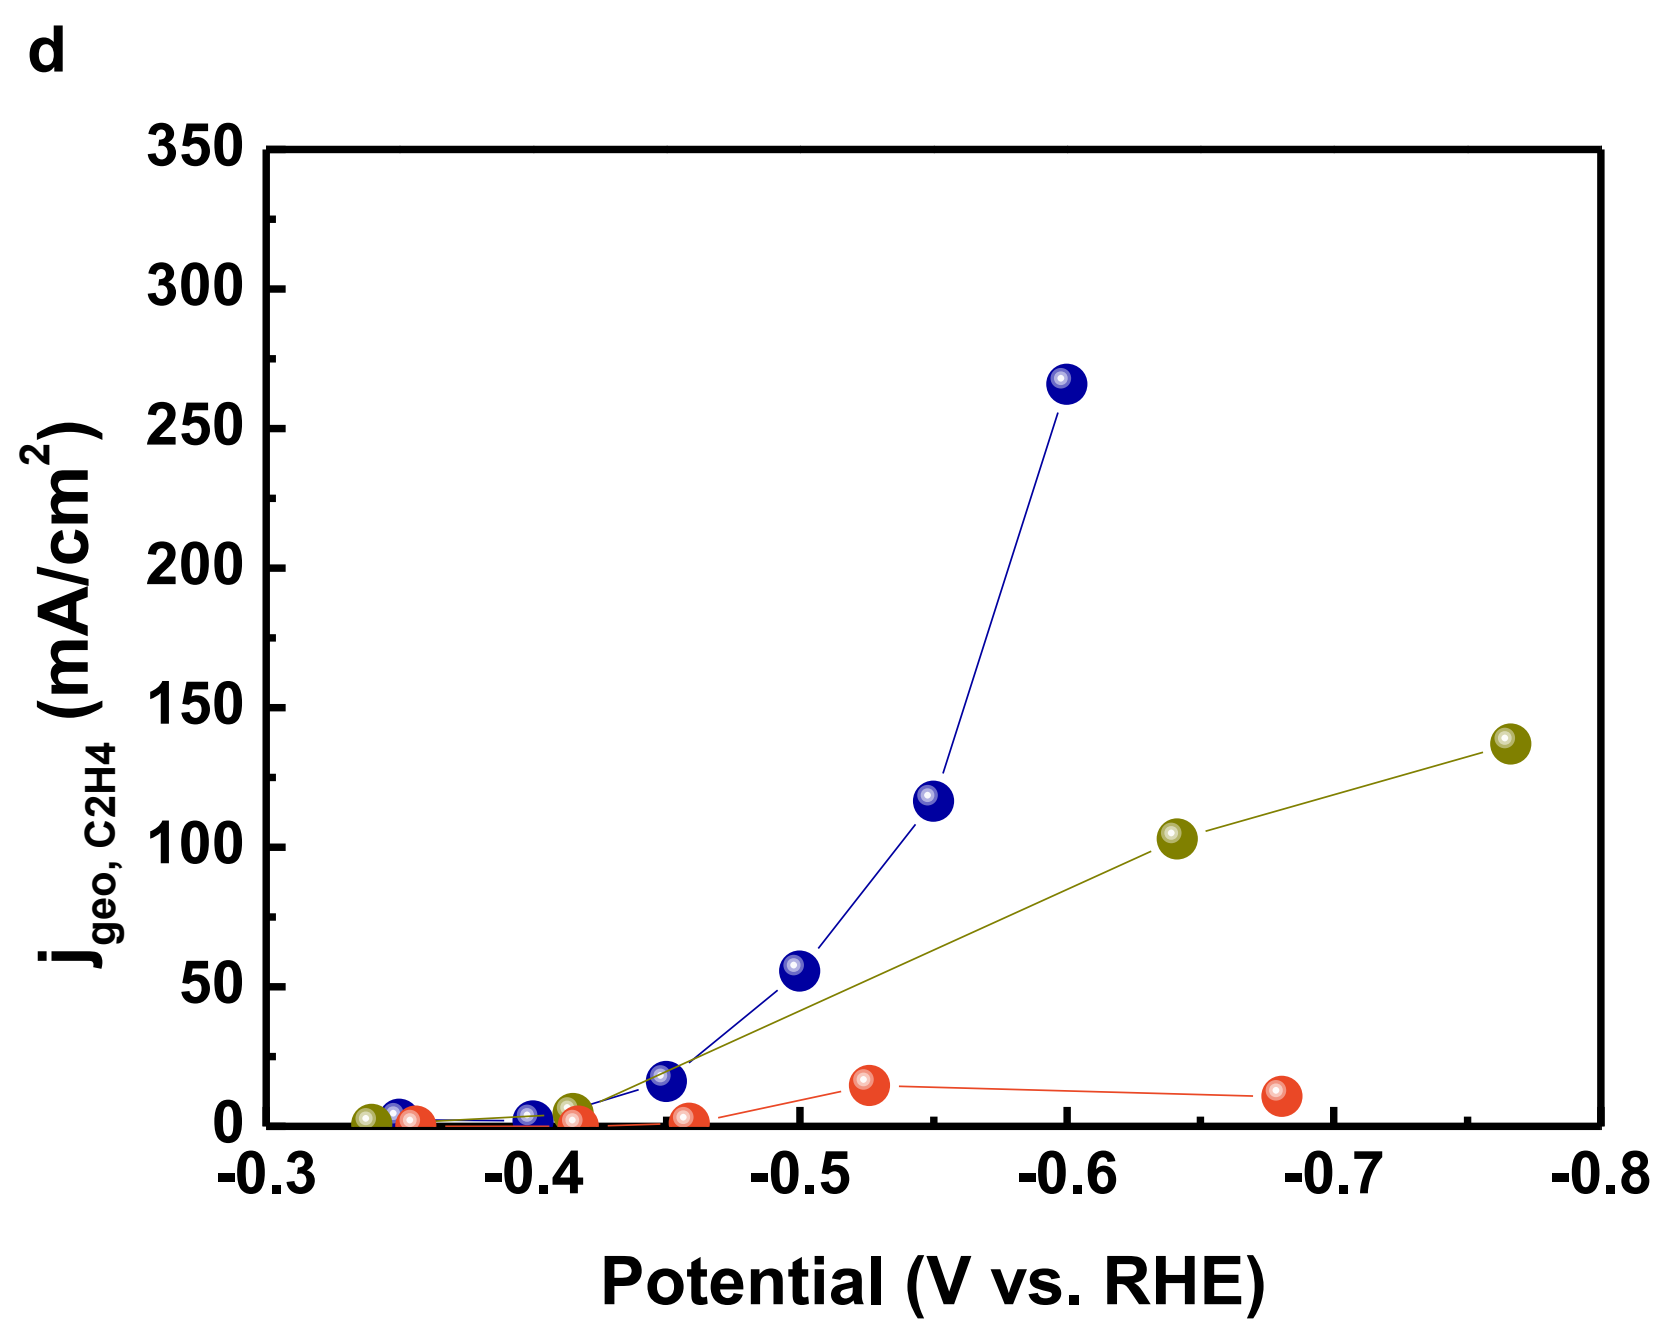

**Fig. S18** (a,c) Faradaic efficiency and (b,d) geometric partial current density of (a, b) CO and (c, d) C<sub>2</sub>H<sub>4</sub> as a function of potential

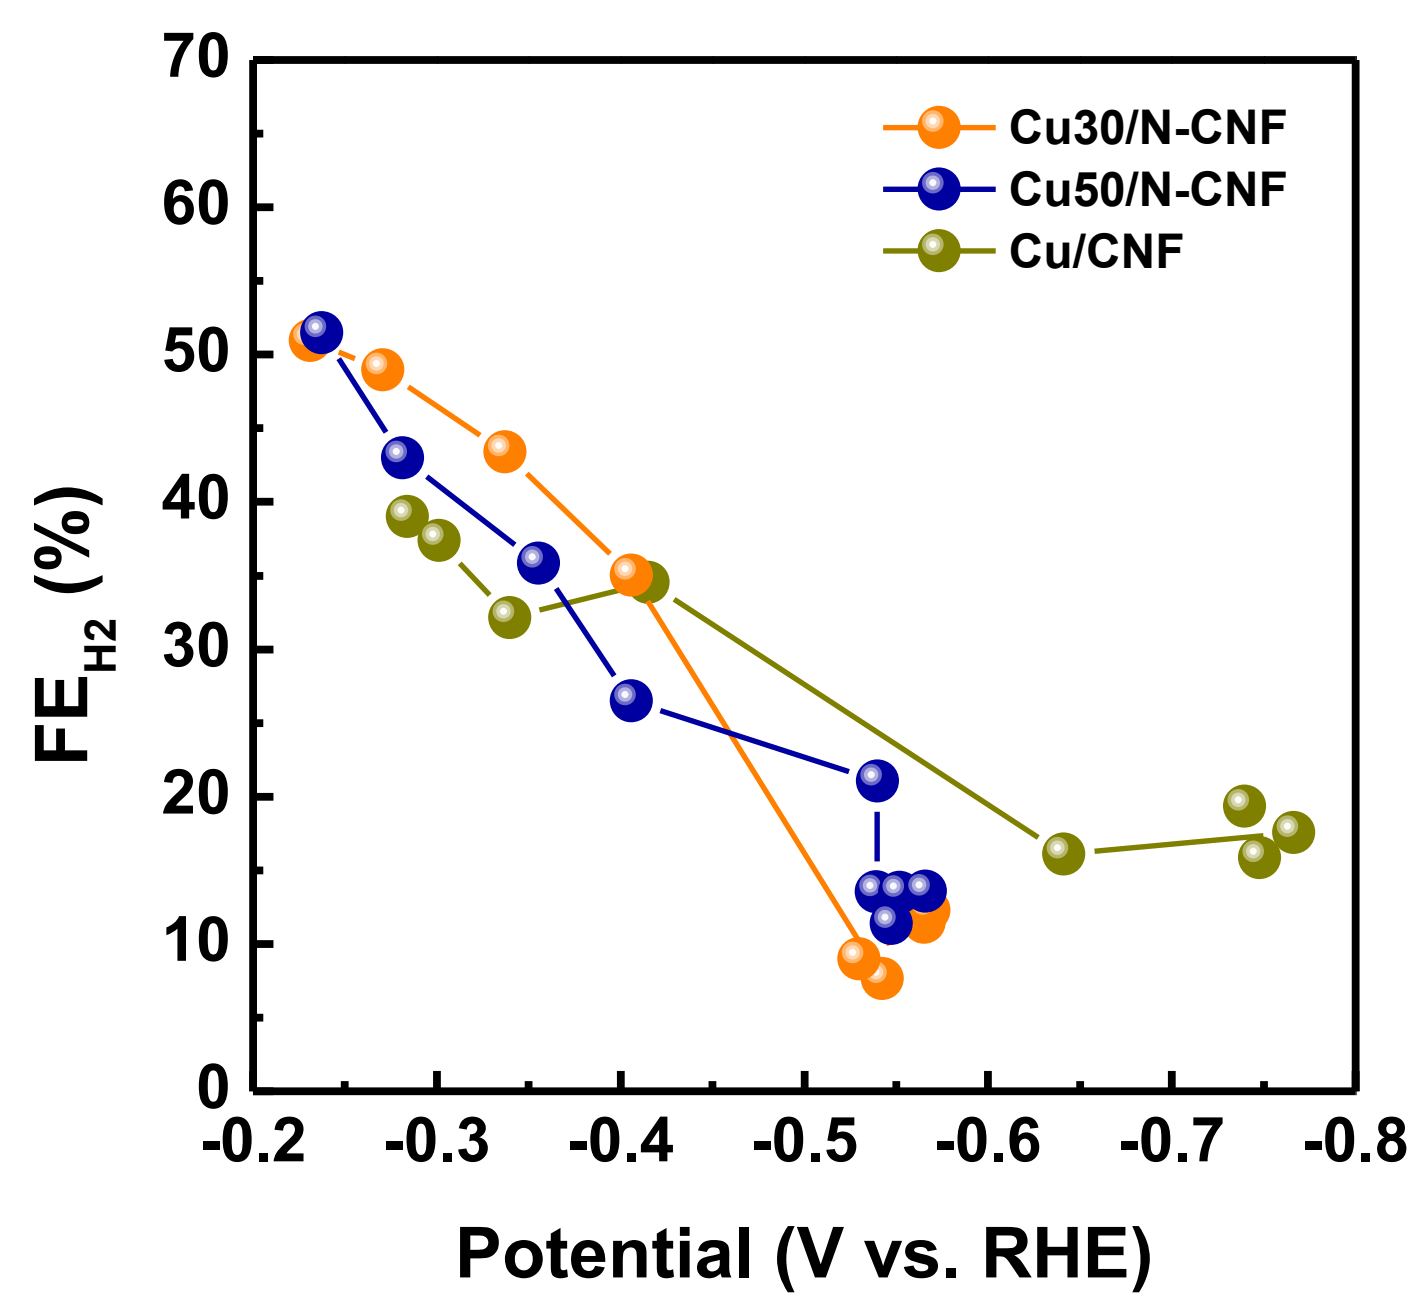

**Fig. S19** Faradaic efficiency of H<sub>2</sub> as function of potential.



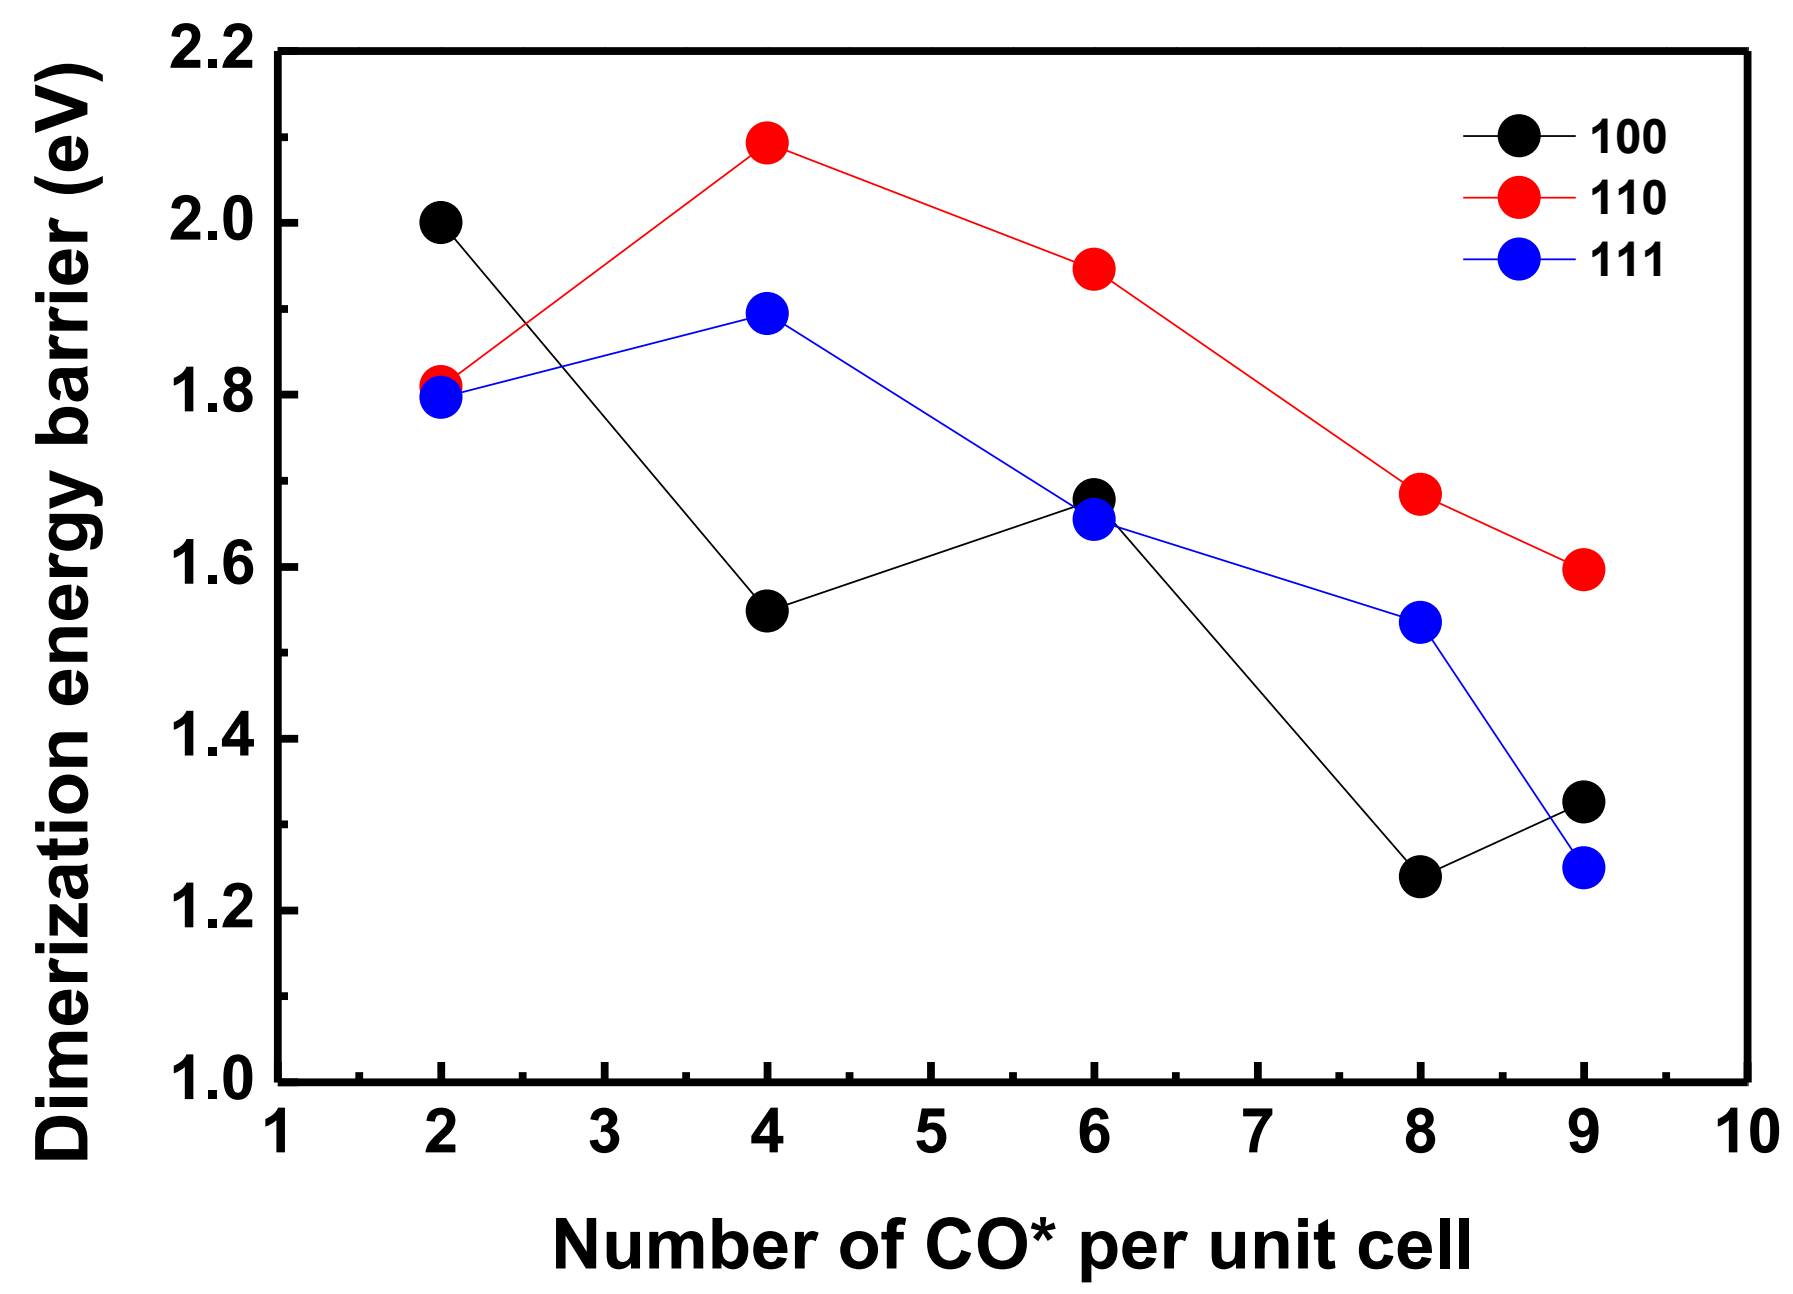

**Fig. S20** Dimerization energy barrier as function of number of CO\* per unit cell

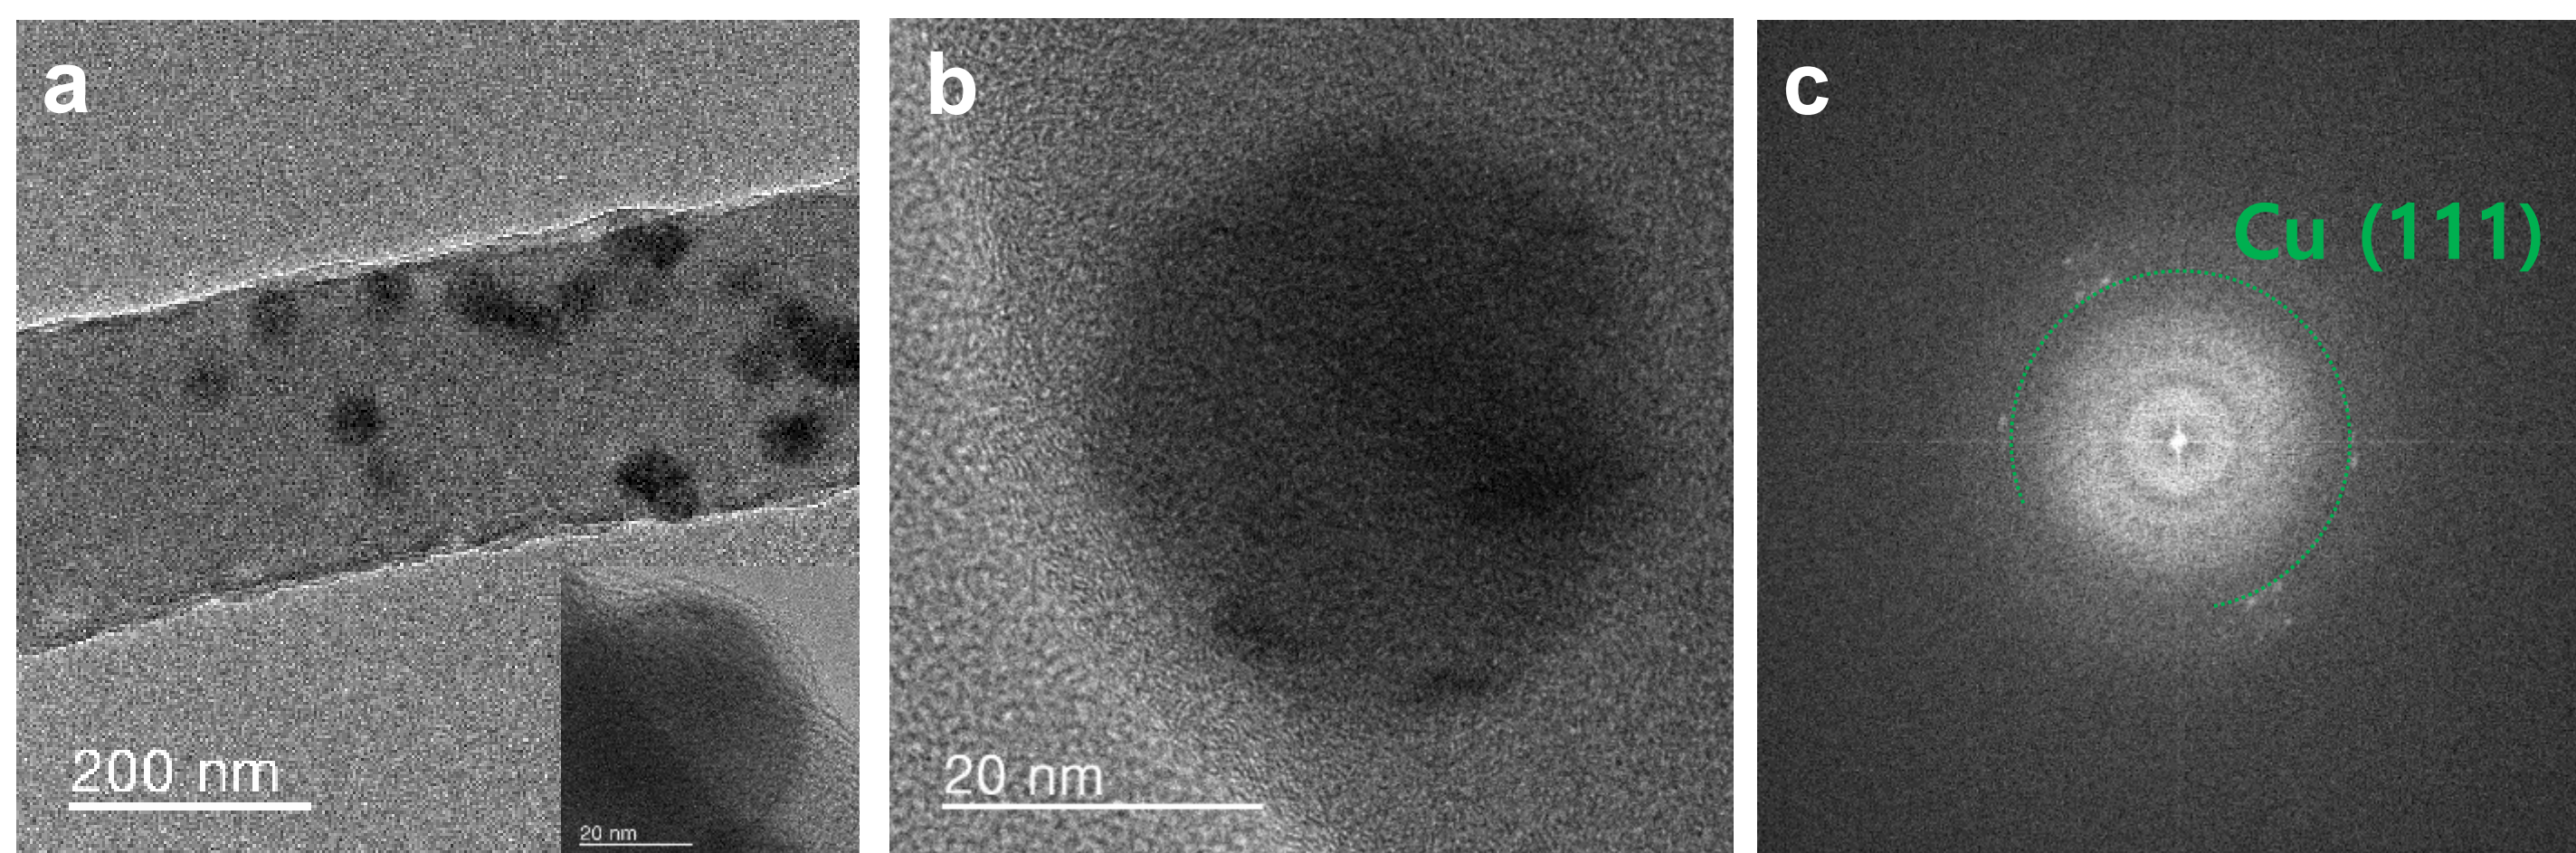

**Fig. S21** (a, b) HRTEM image and (c) FFT analysis of Cu50/N-CNF after 2 hour of CO<sub>2</sub> RR

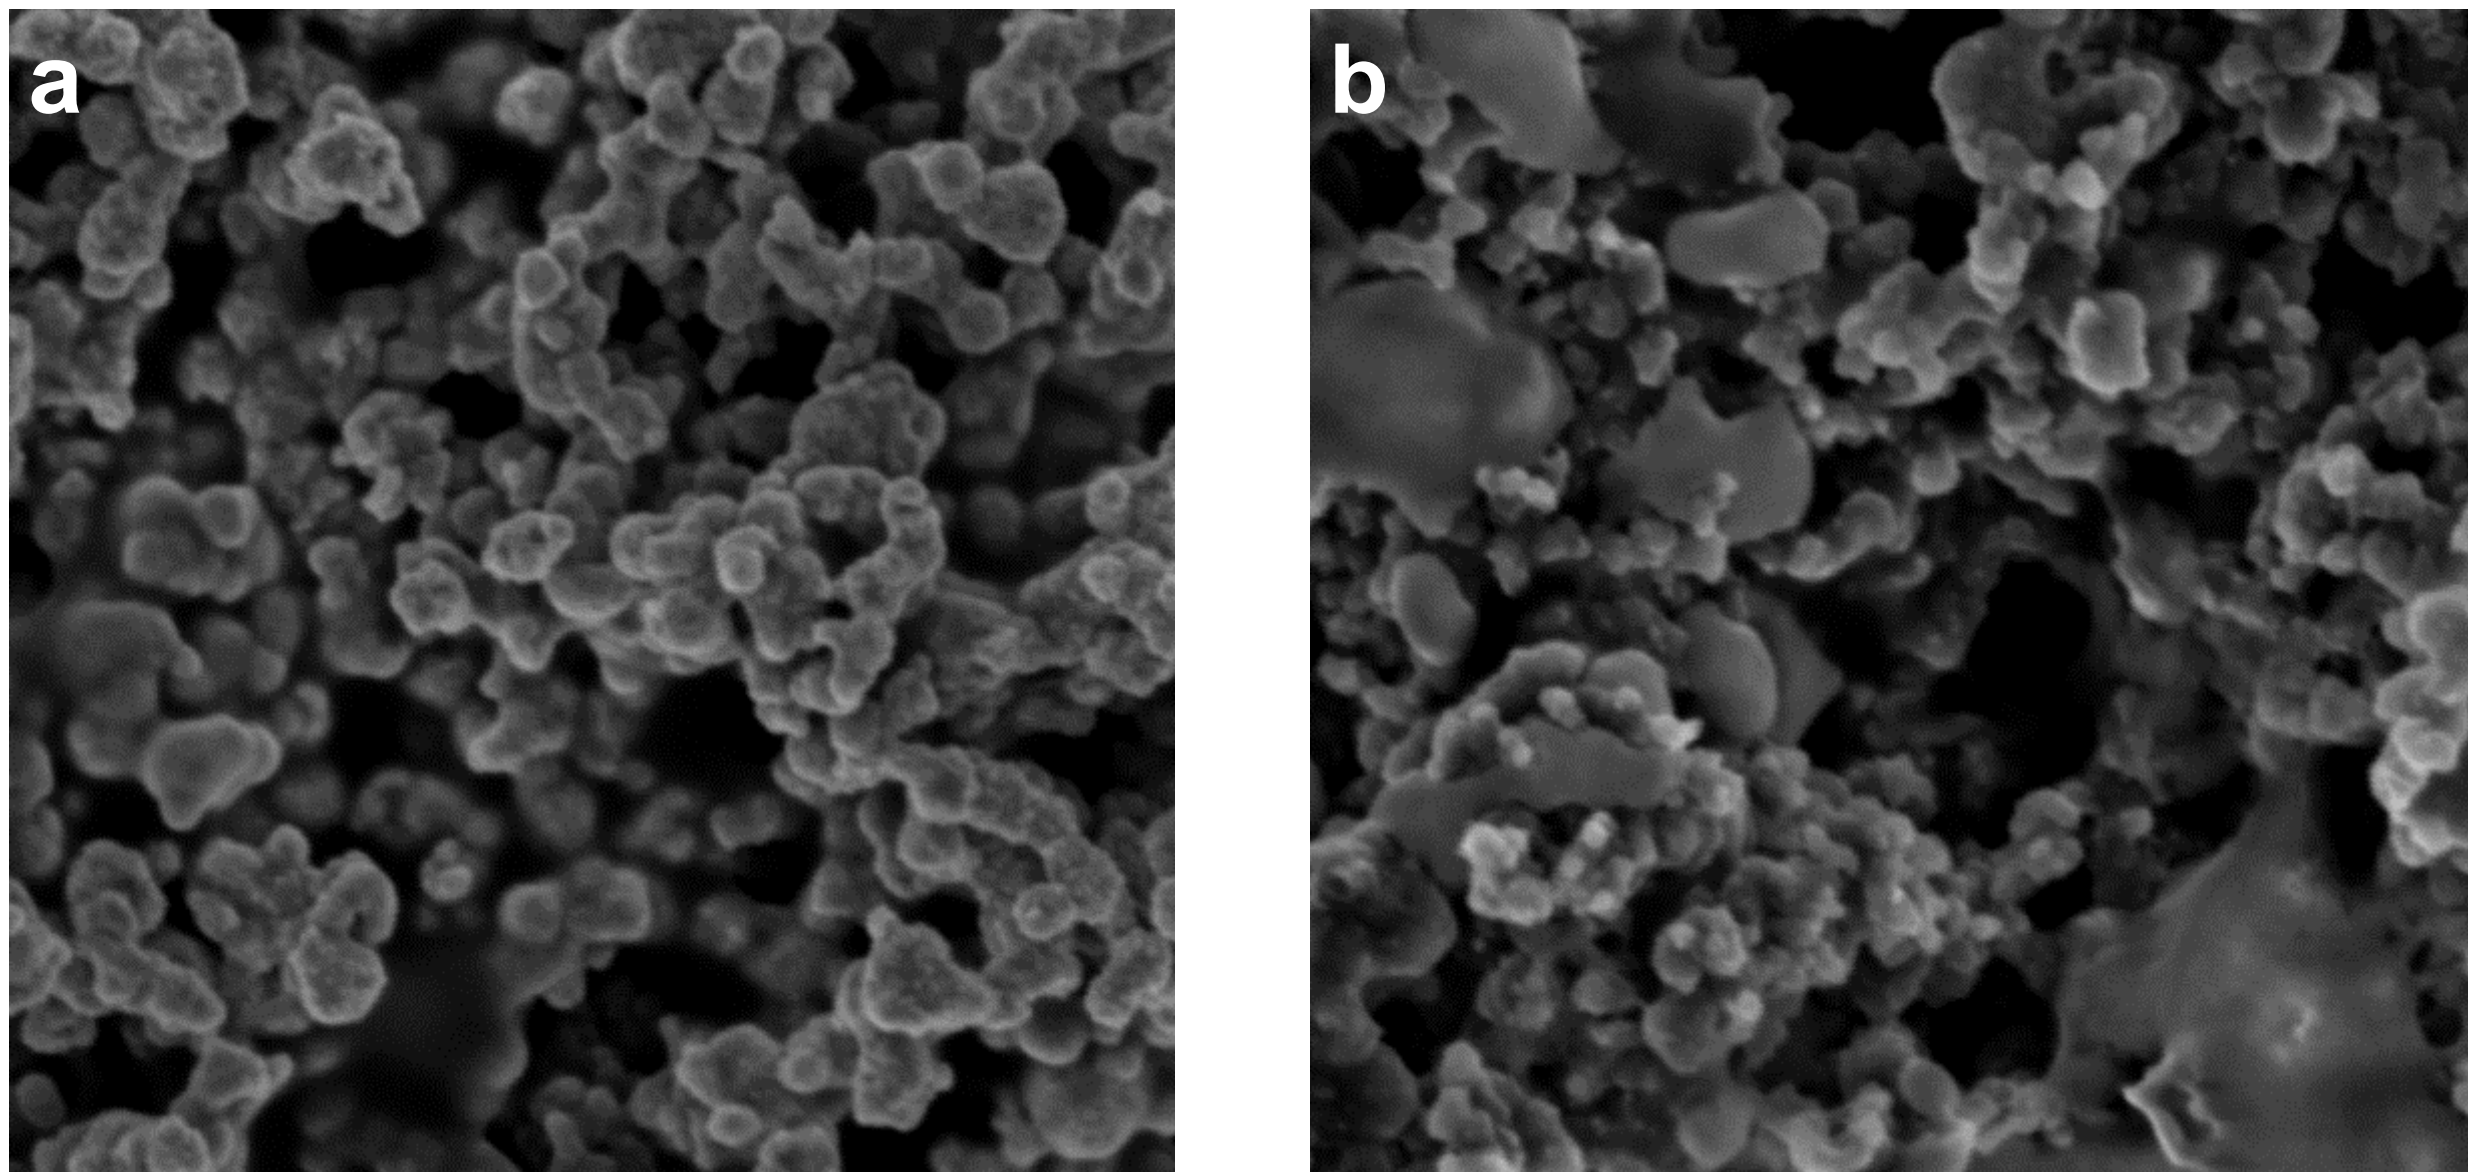

**Fig. S22** SEM image of commercial Cu powder (a) before reaction, and (b) after 2 hour of CO<sub>2</sub> RR



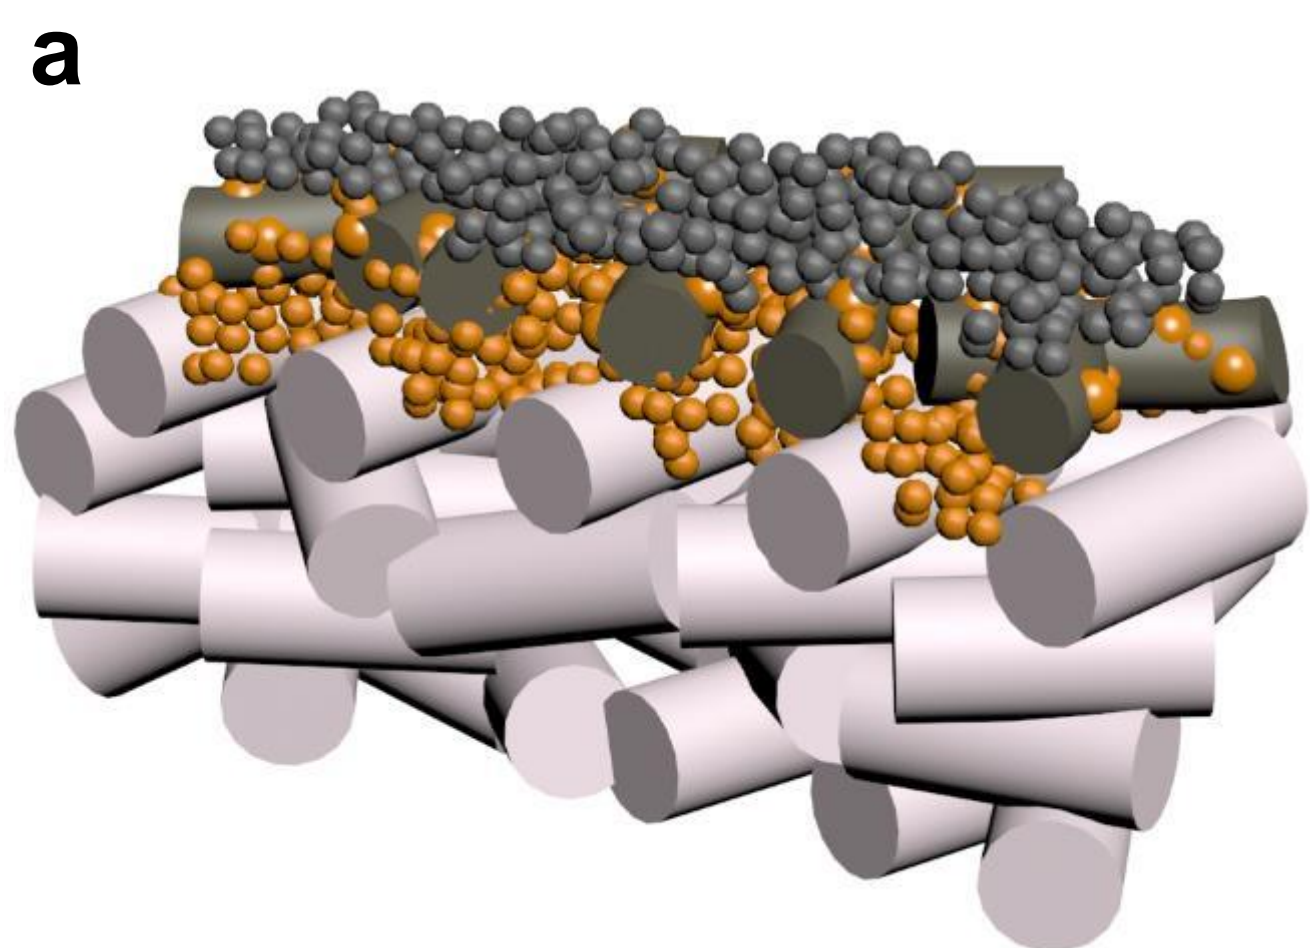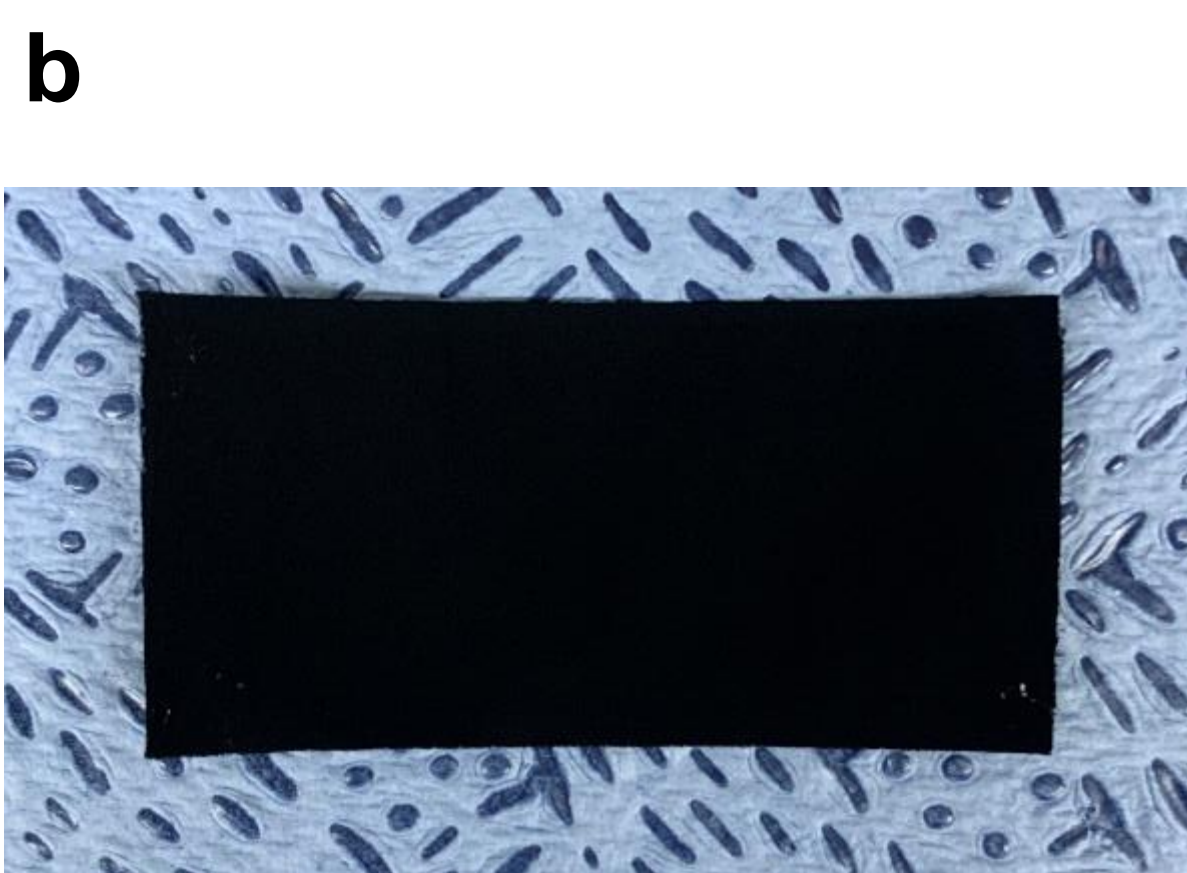

**Fig S23** (a) Schematics and (b) image of carbon black/Cu/CuNCNF/PTFE



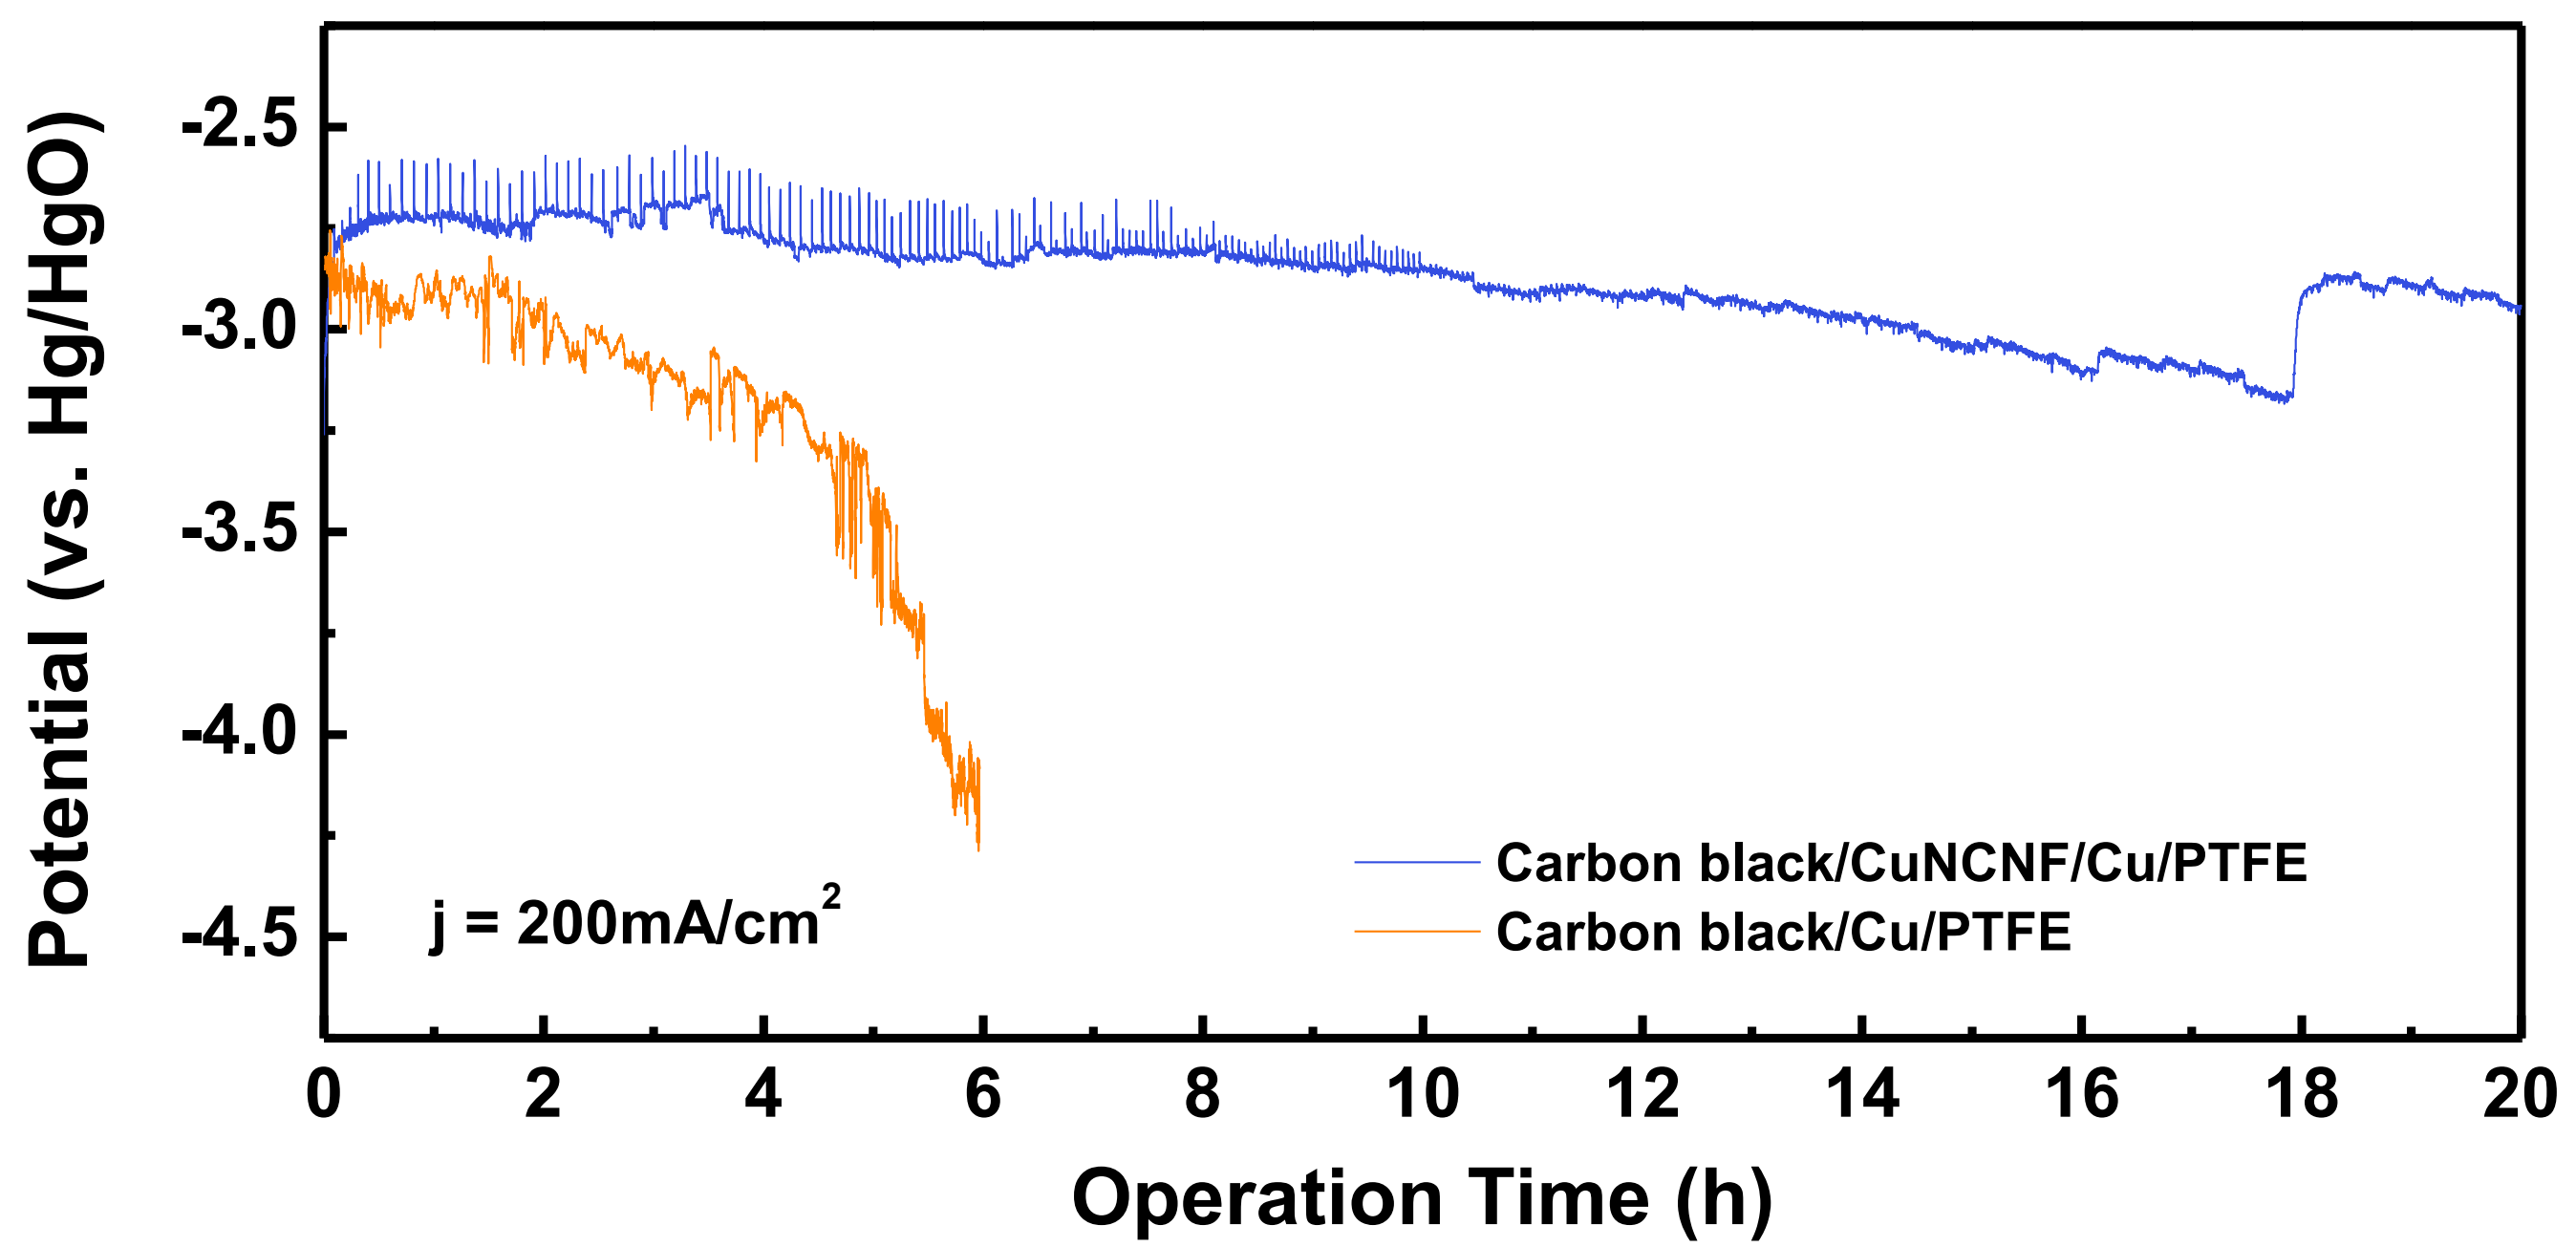

**Fig. S24** Potential profile of carbon black/CuNCNF/Cu/PTFE and carbon black/Cu/PTFE for 20 hours of reactions.
